# Supplementary material
Source: PubMed Central journal article supplement (PMC5890429)
Supplement: NIHMS945825-supplement-11.pdf [file NIHMS945825-supplement-11.pdf]

# Supporting Information

## Insights into Thiol-Aromatic Interactions: A Stereoelectronic Basis for S–H/ $\pi$ Interactions

Christina R. Forbes, Sudipta K. Sinha<sup>‡</sup>, Himlal K. Ganguly<sup>‡</sup>, Shi Bai\*, Glenn P. A. Yap\*, Sandeep Patel\*, and Neal J. Zondlo\*

Department of Chemistry and Biochemistry  
University of Delaware  
Newark, DE 19716  
United States

<sup>‡</sup> These authors contributed equally.

### Contents

#### S2. Materials

##### S2-S75. IR Spectroscopy of **1** and *p*-thiocresol

S6-S19. IR Spectroscopy of Boc-L-4-thiolphenylalanine *tert*-butyl ester (**1**)

S20-S34. IR Spectroscopy of *p*-thiocresol (200 mM) in different solvents

S35-S36. Comparison of the S–H stretching frequency of *p*-thiocresol in the presence of aromatic donors

S37-S39. Self-association of *p*-thiocresol in solution

S40-S67. Titration of *p*-thiocresol with different aromatic donors

S41-S45. Hexamethylbenzene

S46-S50. Mesitylene

S50-S56. 1-Methylindole

S57-S61. Toluene

S62-S65. *m*-Dichlorobenzene

S68-S71. Determination of the dissociation constant for *p*-thiocresol in solution

S72-S75. Estimation of  $\Delta H$  and  $\Delta S$  for the S–H/ $\pi$  interaction of *p*-thiocresol with aromatic donors

##### S76-S87. Solid-State Magic-Angle-Spinning (MAS) <sup>13</sup>C NMR Spectroscopy of **1** and *p*-thiocresol

##### S88-S93. *ab initio* calculations on *p*-thiocresol

S94. Analysis of  $\nu_{\text{S-H}}$  as a function of S–H bond length and interaction with the aromatic ring

##### S95-S113. Cambridge Structural Database (CSD) search parameters and results

S99-S113. Results from CSD searches

##### S114-S128. Crystal packing, crystallographic details, and refinement parameters

S115-S124. Crystallographic details for **1**

S125-S128. Crystallographic details for *p*-thiocresol

##### S129. References

## Materials

Boc-L-4-thiophenylalanine *tert*-butyl ester (**1**) was synthesized as previously described.<sup>1</sup> *p*-Thiocresol was purchased from Sigma and was used without further purification. Solution NMR spectra were recorded on a Brüker 400 MHz NMR spectrometer equipped with a cryogenic QNP probe or a Brüker 600 MHz NMR spectrometer equipped with a 5-mm Brüker SMART probe.

## FT-IR Spectroscopy

All spectra (64 scans) were recorded on a Nicolet Magna-IR 750 FT-IR spectrometer equipped with a liquid nitrogen-cooled MCT/A detector at a spectral resolution of 1 cm<sup>-1</sup>. Solution samples were filled in a gas-tight IR cell (100 µL volume) equipped with quartz windows, and contained 200 mM of **1** or *p*-thiocresol. *p*-Thiocresol was used as purchased without further purification (Sigma-Aldrich). Solvent spectra were subtracted from the sample spectra. The baseline was manually corrected using the OMNIC FT-IR Software (Nicolet). Crystalline samples were measured using the pressed pellet method with anhydrous KBr (Sigma-Aldrich).

**Table S8.** IR data for the S–H stretching frequency of **1** and *p*-thiocresol:  $\nu_{\max}$  of the S–H stretching frequency ( $\text{cm}^{-1}$ ), signal intensity (absorbance), and the full-width at half-maximum (FWHM). Standard errors for absorbance intensity at the indicated  $\nu_{\max}$  were less than 10%, unless otherwise indicated (in parentheses as  $\pm$  standard error).

|                                       | <b>1</b>                           |                                 |                           | <i>p</i> -thiocresol               |                                 |                           |
|---------------------------------------|------------------------------------|---------------------------------|---------------------------|------------------------------------|---------------------------------|---------------------------|
|                                       | $\nu_{\max}$ ,<br>$\text{cm}^{-1}$ | Intensity,<br>Absorbance        | FWHM,<br>$\text{cm}^{-1}$ | $\nu_{\max}$ ,<br>$\text{cm}^{-1}$ | Intensity,<br>Absorbance        | FWHM,<br>$\text{cm}^{-1}$ |
| Crystalline                           | 2538                               | 0.2315 <sup>a</sup><br>[0.0956] | 18                        | 2563                               | 0.0235 <sup>a</sup><br>[0.0264] | 18                        |
| CCl <sub>4</sub>                      | n.d. <sup>b</sup>                  | n.d. <sup>b</sup>               | n.d. <sup>b</sup>         | 2586                               | 0.0022                          | 25                        |
| CHCl <sub>3</sub>                     | 2585                               | 0.0037                          | 21                        | 2585                               | 0.0051                          | 21                        |
| Ethyl Acetate                         | 2566                               | 0.0195                          | 33                        | 2567                               | 0.0211                          | 33                        |
| 25% Ethyl Acetate in CCl <sub>4</sub> | 2567                               | 0.0084                          | 37                        | 2569                               | 0.0093                          | 35                        |
| 10% Ethyl Acetate in CCl <sub>4</sub> | 2569                               | 0.0033<br>( $\pm 0.0009$ )      | 52                        | 2571                               | 0.0046                          | 39                        |
| Acetone                               | 2558                               | 0.0200                          | 55                        | 2558                               | 0.0267                          | 55                        |
| 25% Acetone in CCl <sub>4</sub>       | 2559                               | 0.0088<br>( $\pm 0.0010$ )      | 49                        | 2561                               | 0.0105                          | 52                        |
| 10% Acetone in CCl <sub>4</sub>       | 2559                               | 0.0052<br>( $\pm 0.0009$ )      | 57                        | 2565                               | 0.0055                          | 55                        |
| 25% MeOH in CCl <sub>4</sub>          | 2541                               | 0.0045                          | br <sup>c</sup>           | 2521                               | 0.0062                          | br <sup>c</sup>           |
|                                       | 2497                               | 0.0050                          |                           |                                    |                                 |                           |
| 10% MeOH in CCl <sub>4</sub>          | 2554                               | 0.0025                          | br <sup>c</sup>           | 2584                               | 0.0027                          | br <sup>c</sup>           |
|                                       | 2499                               | 0.0026                          |                           | 2548                               | 0.0023                          |                           |
|                                       |                                    |                                 |                           | 2518                               | 0.0021                          |                           |
| 25% THF in CCl <sub>4</sub>           | 2534                               | 0.0057                          | 75                        | 2530                               | 0.0082                          | 69                        |
| 10% THF in CCl <sub>4</sub>           | 2541                               | 0.0034                          | br <sup>c</sup>           | 2531                               | 0.0036                          | br <sup>c</sup>           |

<sup>a</sup> Absolute intensity was normalized with respect to the  $\nu_{\max}$  at 2925-2935  $\text{cm}^{-1}$  in 25% acetone/CCl<sub>4</sub>. This approach was employed because the signal in crystalline material is based on an arbitrary amount of solid. In contrast, all solution data were collected with 200 mM of compound in the indicated solvents. The normalization of the S–H stretching frequency for crystalline samples was based on the C–H stretching frequency due to its relatively constant relative intensity in all solution samples. This normalization allows for direct comparison of the relative intensities of the S–H stretching frequencies in solution versus in solid state. The absolute absorbance for the crystalline sample is shown in brackets.

<sup>b</sup> n.d. not determined due to low solubility.

<sup>c</sup> broad signal (FWHM > 80  $\text{cm}^{-1}$  or apparently overlapping signals)

**Table S9.** Relative absorbance intensities for **1**. The intensity of the S–H stretching frequency (2534-2586 cm<sup>-1</sup>) was compared to the intensity of the aromatic C–C frequency (1494-1497 cm<sup>-1</sup>). Standard errors for intensity at the indicated  $\nu_{\max}$  were less than 10%.

|                                       | $\nu_{\max}$ , cm <sup>-1</sup> |                   | Absorbance Intensity |                   | $\frac{\text{S-H Intensity}}{\text{C-C Intensity}}$ |
|---------------------------------------|---------------------------------|-------------------|----------------------|-------------------|-----------------------------------------------------|
|                                       | S–H                             | C–C               | S–H                  | C–C               |                                                     |
| Crystalline                           | 2538                            | 1496              | 0.0956               | 0.0886            | 1.08                                                |
| CCl <sub>4</sub>                      | n.d. <sup>a</sup>               | n.d. <sup>a</sup> | n.d. <sup>a</sup>    | n.d. <sup>a</sup> | n.d. <sup>a</sup>                                   |
| CHCl <sub>3</sub>                     | 2585                            | 1495              | 0.0038               | 0.4859            | 0.01                                                |
| Ethyl Acetate                         | 2566                            | 1497              | 0.0195               | 0.2908            | 0.07                                                |
| 25% Ethyl Acetate in CCl <sub>4</sub> | 2567                            | 1495              | 0.0084               | 0.4079            | 0.02                                                |
| 10% Ethyl Acetate in CCl <sub>4</sub> | 2569                            | 1494              | 0.0037               | 0.3775            | 0.01                                                |
| Acetone                               | 2558                            | 1497              | 0.0200               | 0.2588            | 0.08                                                |
| 25% Acetone in CCl <sub>4</sub>       | 2559                            | 1495              | 0.0088               | 0.3813            | 0.02                                                |
| 10% Acetone in CCl <sub>4</sub>       | 2559                            | 1495              | 0.0052               | 0.4397            | 0.01                                                |
| 25% MeOH in CCl <sub>4</sub>          | 2541                            | 1496              | 0.0045               | 0.2845            | 0.02                                                |
|                                       | 2497                            |                   | 0.0050               |                   | 0.02                                                |
| 10% MeOH in CCl <sub>4</sub>          | 2554                            | 1495              | 0.0025               | 0.3209            | 0.01                                                |
|                                       | 2499                            |                   | 0.0026               |                   | 0.01                                                |
| 25% THF in CCl <sub>4</sub>           | 2534                            | 1495              | 0.0057               | 0.3694            | 0.02                                                |
| 10% THF in CCl <sub>4</sub>           | 2541                            | 1494              | 0.0034               | 0.4044            | 0.01                                                |

<sup>a</sup>n.d. not determined due to low solubility.

**Table S10.** Relative absorbance intensities for *p*-thiocresol. The intensity of the S–H stretching frequency (2530-2586 cm<sup>-1</sup>) was compared to the intensity of the aromatic C–C frequency (1493-1496 cm<sup>-1</sup>). Standard errors for intensity at the indicated  $\nu_{\max}$  were less than 10%.

|                                       | $\nu_{\max}$ , cm <sup>-1</sup> |      | Absorbance Intensity |        | $\frac{\text{S-H Intensity}}{\text{C-C Intensity}}$ |
|---------------------------------------|---------------------------------|------|----------------------|--------|-----------------------------------------------------|
|                                       | S–H                             | C–C  | S–H                  | C–C    |                                                     |
| Crystalline                           | 2563                            | 1493 | 0.0264               | 0.1057 | 0.25                                                |
| CCl <sub>4</sub>                      | 2586                            | 1496 | 0.0022               | 0.1343 | 0.02                                                |
| CHCl <sub>3</sub>                     | 2585                            | 1495 | 0.0051               | 0.1767 | 0.03                                                |
| Ethyl Acetate                         | 2567                            | 1496 | 0.0211               | 0.1368 | 0.15                                                |
| 25% Ethyl Acetate in CCl <sub>4</sub> | 2569                            | 1496 | 0.0093               | 0.1488 | 0.06                                                |
| 10% Ethyl Acetate in CCl <sub>4</sub> | 2571                            | 1496 | 0.0046               | 0.1448 | 0.03                                                |
| Acetone                               | 2558                            | 1496 | 0.0267               | 0.1713 | 0.16                                                |
| 25% Acetone in CCl <sub>4</sub>       | 2561                            | 1496 | 0.0105               | 0.1465 | 0.07                                                |
| 10% Acetone in CCl <sub>4</sub>       | 2565                            | 1496 | 0.0055               | 0.1500 | 0.04                                                |
| 25% MeOH in CCl <sub>4</sub>          | 2521                            | 1496 | 0.0062               | 0.1402 | 0.04                                                |
|                                       |                                 |      | 2584                 |        | 0.02                                                |
| 10% MeOH in CCl <sub>4</sub>          | 2548                            | 1496 | 0.0023               | 0.1496 | 0.02                                                |
|                                       |                                 |      | 2518                 |        | 0.01                                                |
| 25% THF in CCl <sub>4</sub>           | 2530                            | 1495 | 0.0082               | 0.1407 | 0.06                                                |
| 10% THF in CCl <sub>4</sub>           | 2531                            | 1496 | 0.0036               | 0.1349 | 0.03                                                |

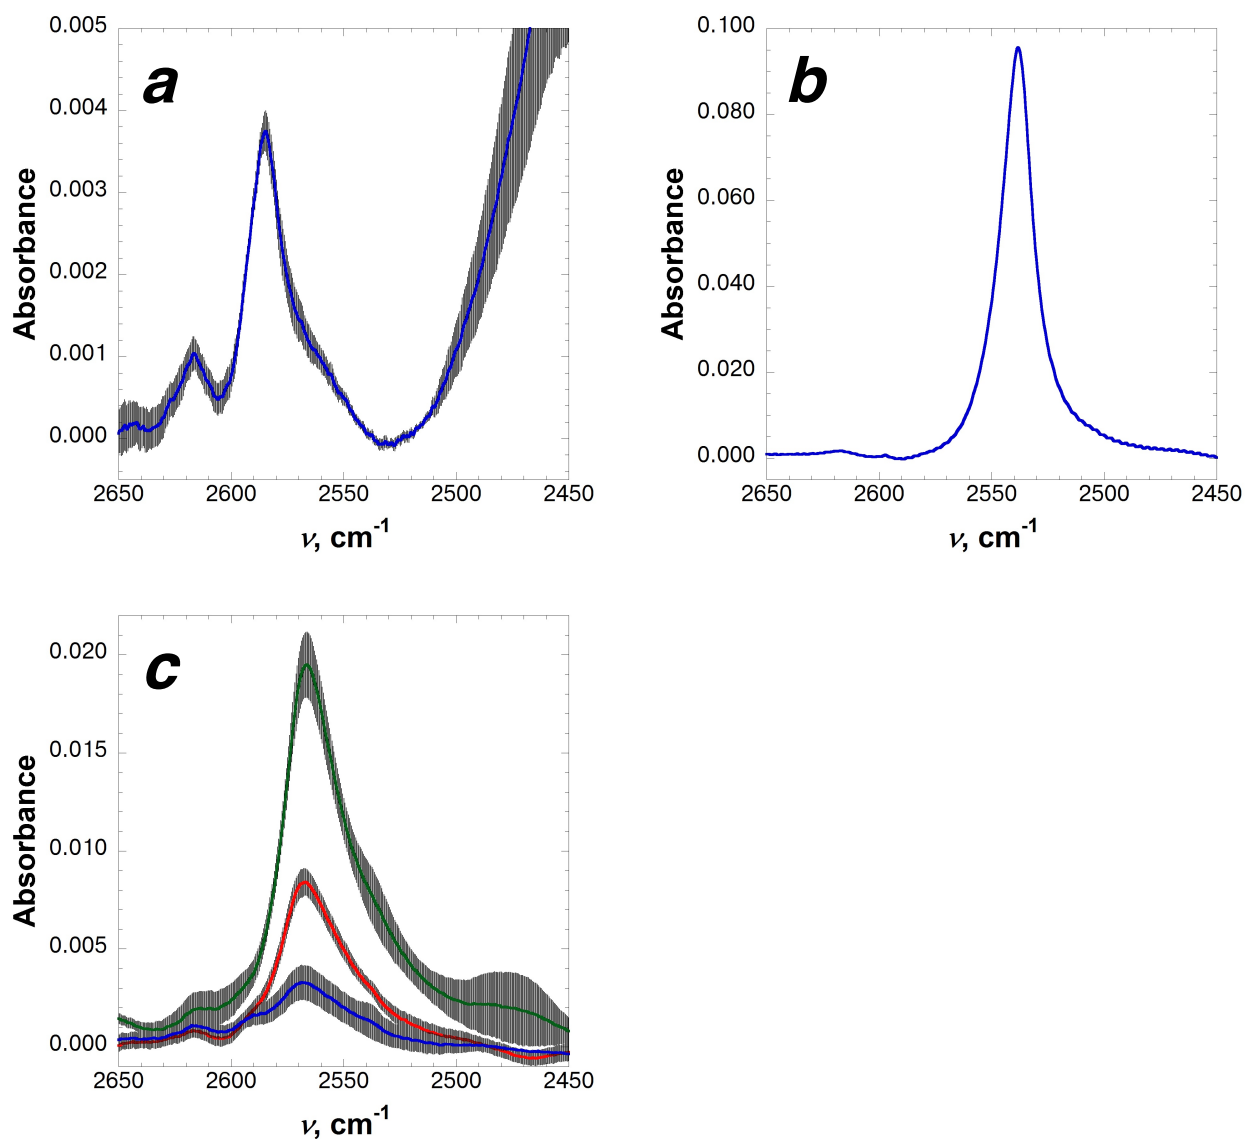

**Figure S1.** FT-IR spectrum of the S–H stretching region of **1**, Boc-L-4-thiophenylalanine *tert*-butyl ester (200 mM) in (a) CHCl<sub>3</sub>, (b) crystalline form, or (c) ethyl acetate in CCl<sub>4</sub> (green, 100% ethyl acetate; red, 25% ethyl acetate; blue, 10% ethyl acetate). Error bars indicate standard error.  $\nu_{\max}$  and signal intensity are reported in Table S8.

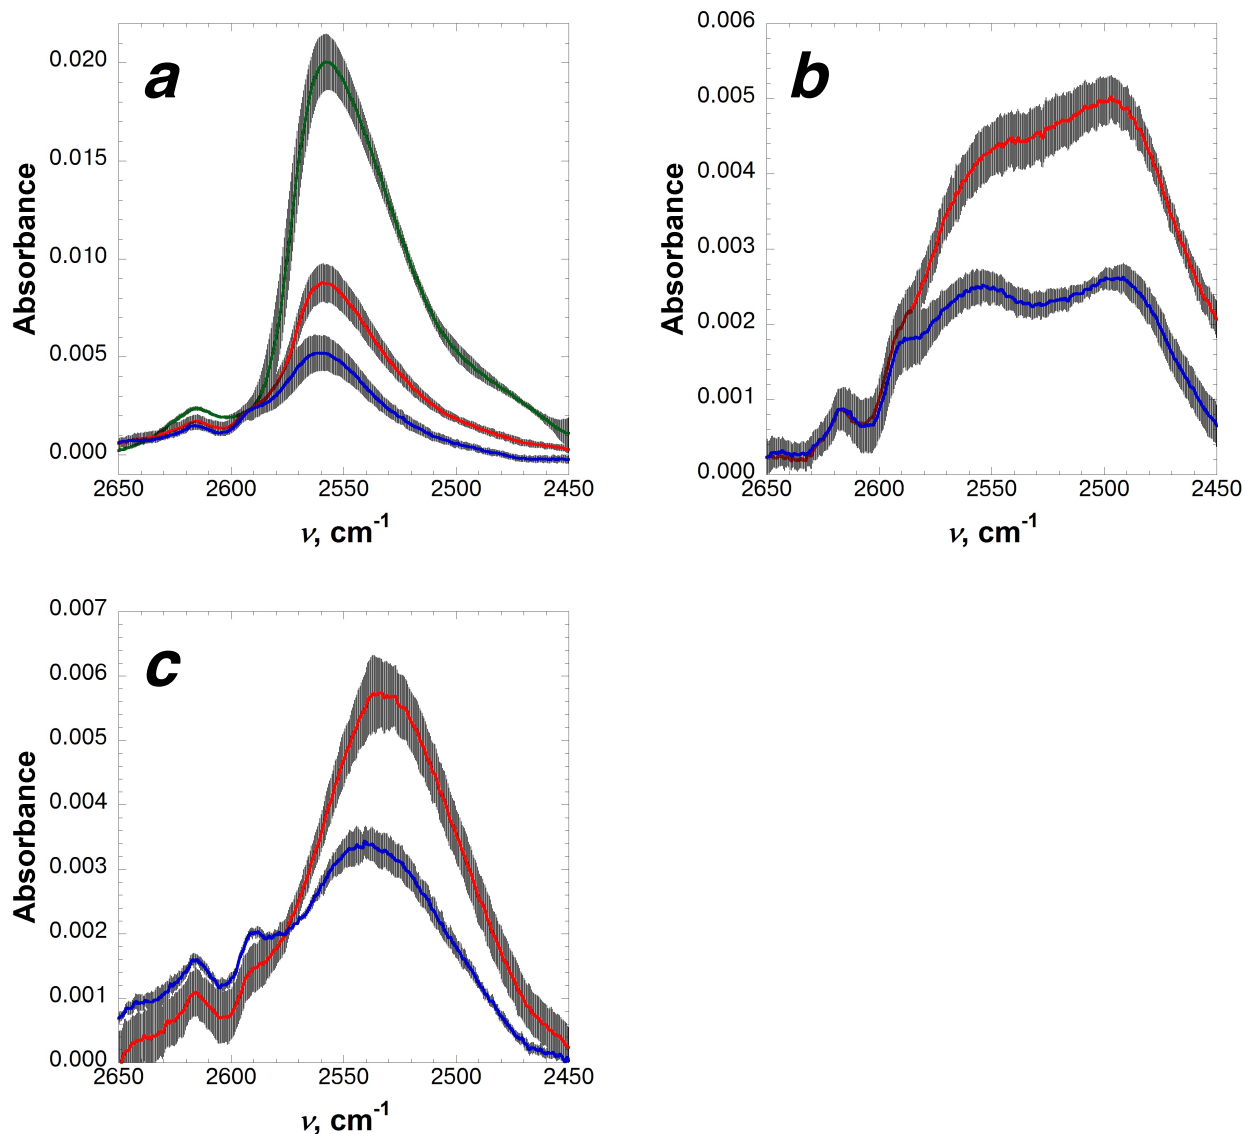

**Figure S2.** FT-IR spectrum of the S–H stretching region of **1**, Boc-L-4-thiophenylalanine *tert*-butyl ester (200 mM) in solutions of (a) acetone in  $\text{CCl}_4$  (green, 100% acetone; red, 25% acetone; blue, 10% acetone); (b) methanol in  $\text{CCl}_4$  (red, 25% methanol; blue, 10% methanol); or (c) THF in  $\text{CCl}_4$  (red, 25% THF; blue, 10% THF). Error bars indicate standard error.  $\nu_{\text{max}}$  and signal intensity are reported in Table S8.

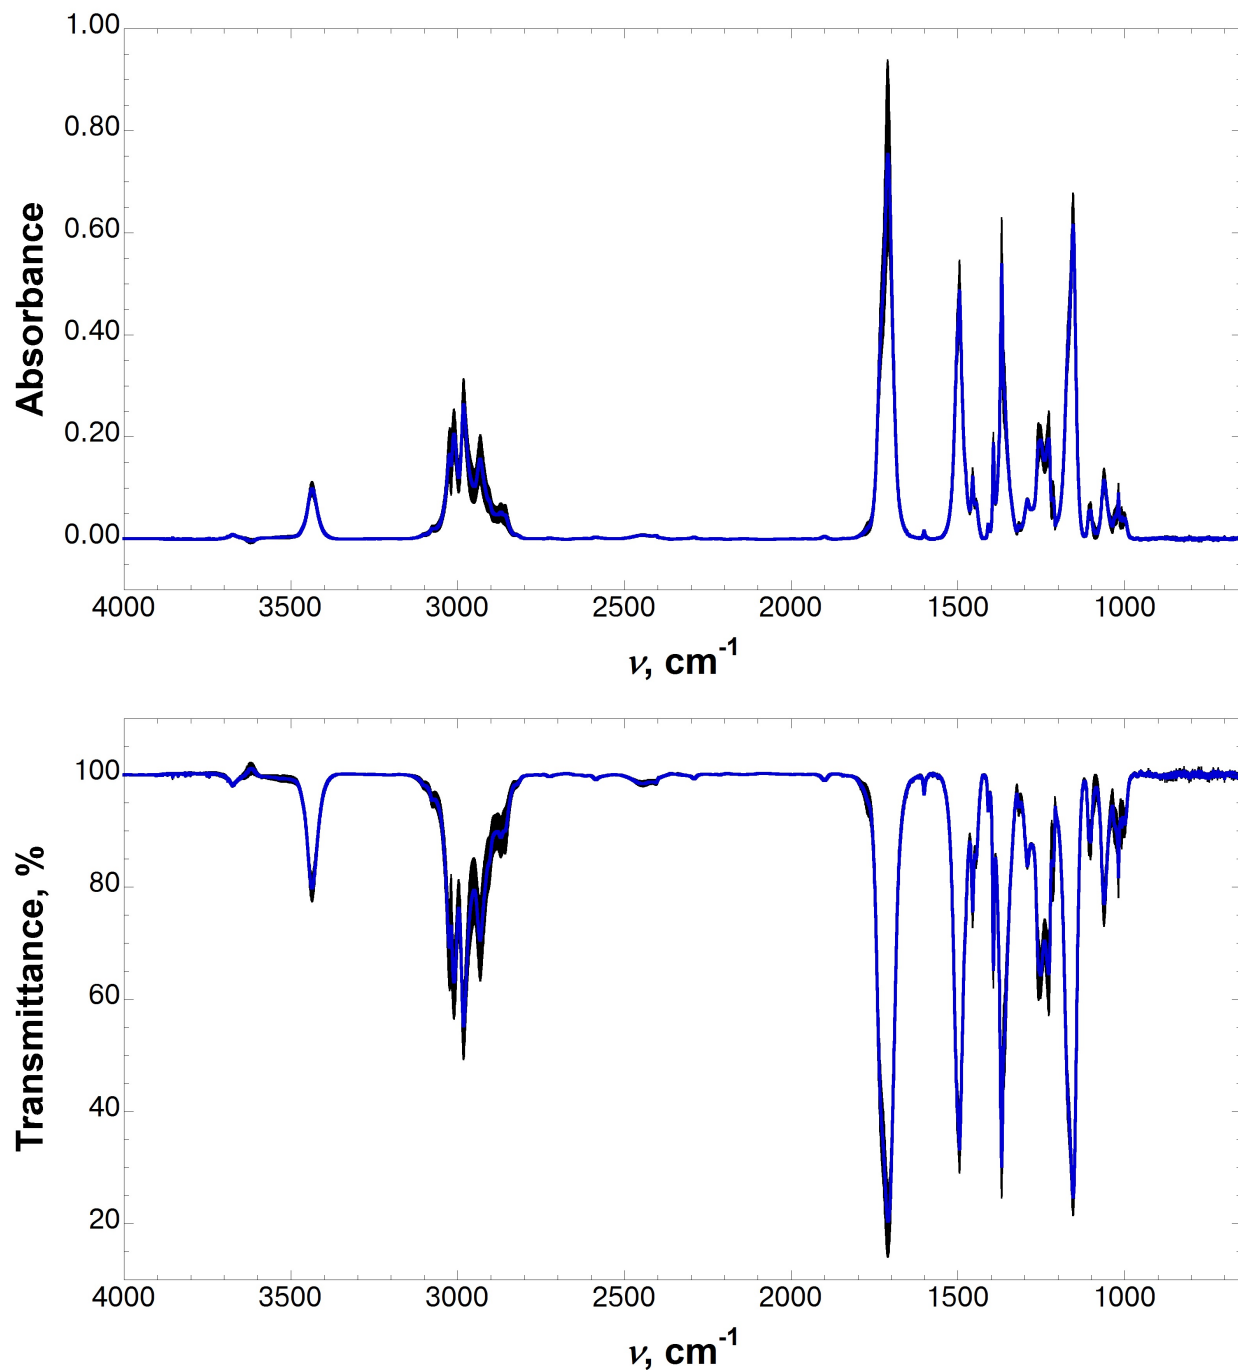

**Figure S3.** FT-IR spectrum of **1**, Boc-L-4-thiolphenylalanine *tert*-butyl ester (200 mM) in  $\text{CHCl}_3$ . Three independent spectra were solvent subtracted, baseline corrected, and averaged. Error bars indicate standard error. Top: full IR absorbance spectrum; bottom: full IR transmittance spectrum.  $\nu_{\text{max}}$  of the S-H stretching frequency is  $2585 \text{ cm}^{-1}$ .



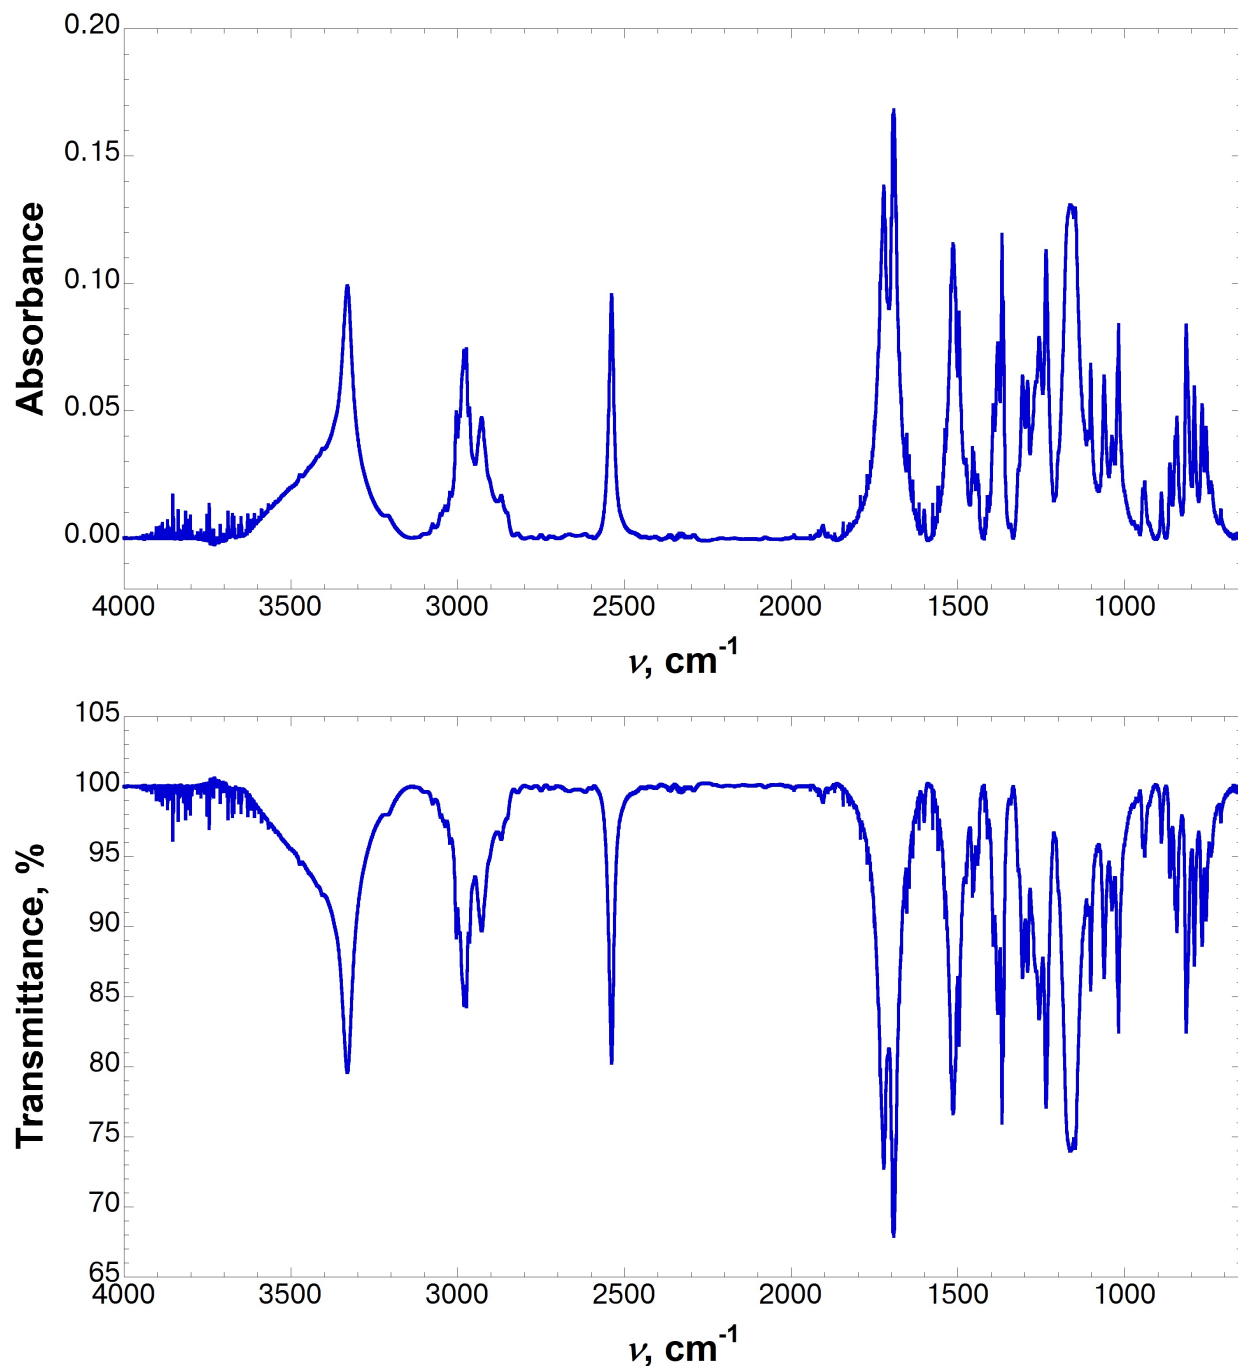

**Figure S4.** FT-IR spectrum of crystalline **1**, Boc-L-4-thiolphenylalanine *tert*-butyl ester in a pressed KBr pellet. **1** crystallized from 25% ethyl acetate in hexanes (v/v) via slow evaporation at room temperature. The spectrum was baseline corrected. Top: full IR absorbance spectrum; bottom: full IR transmittance spectrum.  $\nu_{\text{max}}$  of the S-H stretching frequency is 2538  $\text{cm}^{-1}$ .

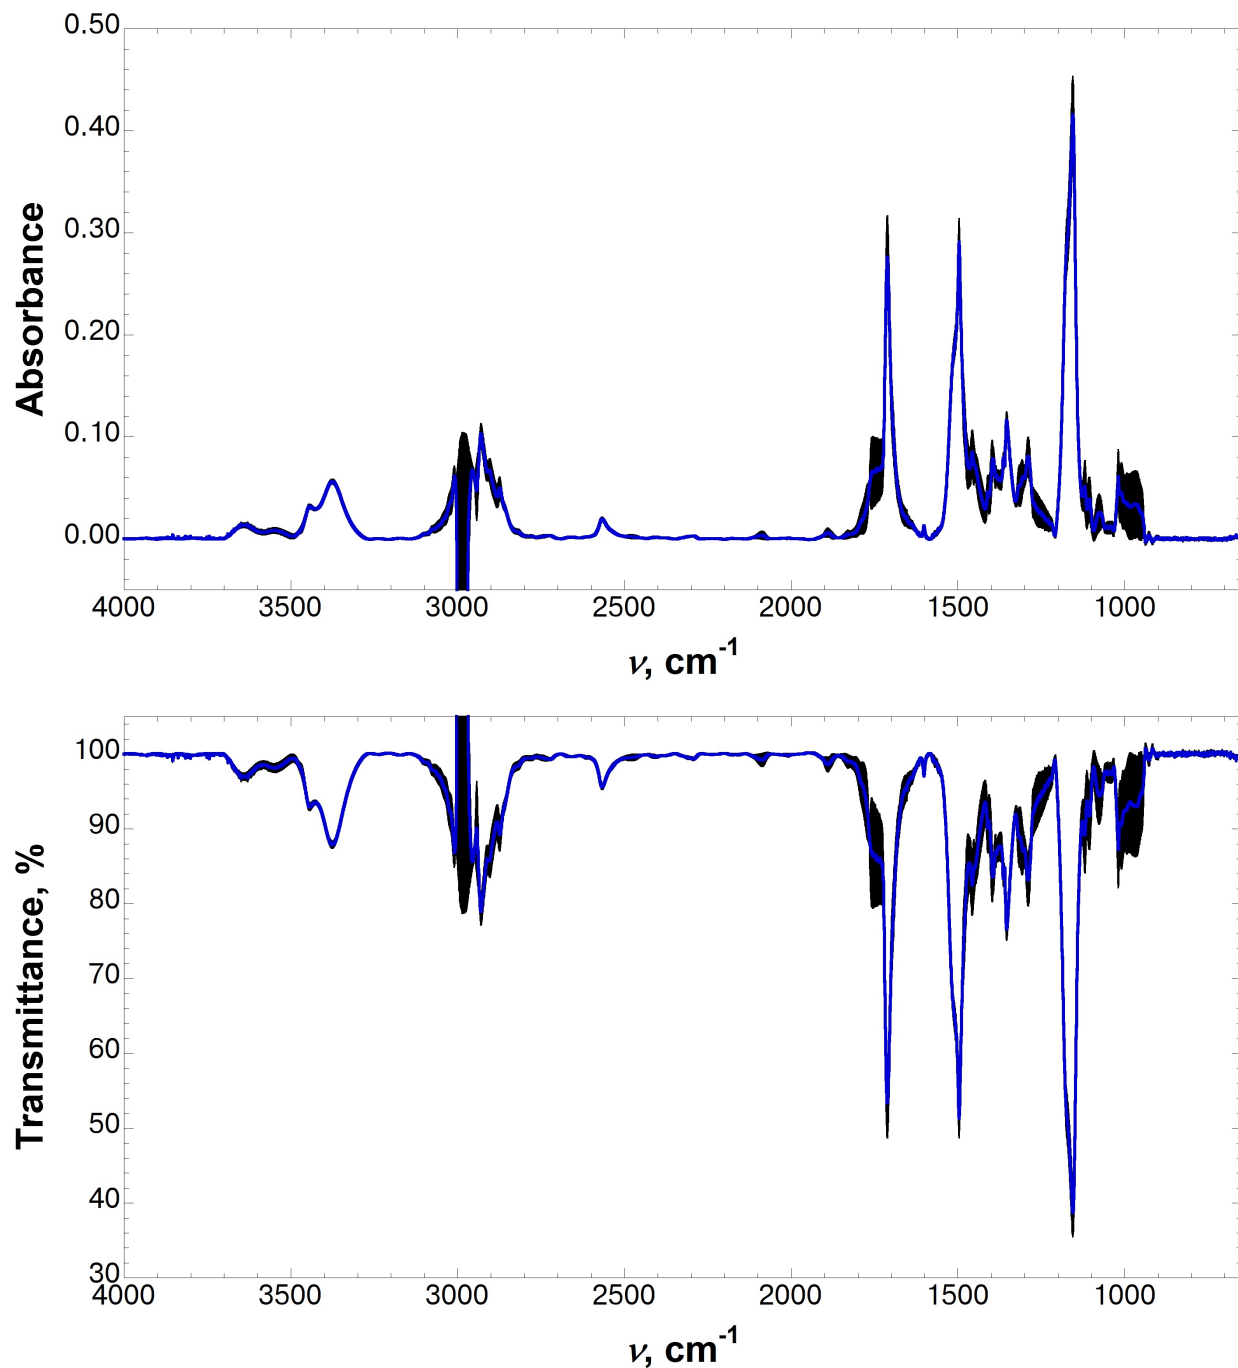

**Figure S5.** FT-IR spectrum of **1**, Boc-L-4-thiophenylalanine *tert*-butyl ester (200 mM) in ethyl acetate. Three independent spectra were solvent subtracted, baseline corrected, and averaged. Error bars indicate standard error. Top: full IR absorbance spectrum; bottom: full IR transmittance spectrum.  $\nu_{\text{max}}$  of the S-H stretching frequency is 2566  $\text{cm}^{-1}$ .

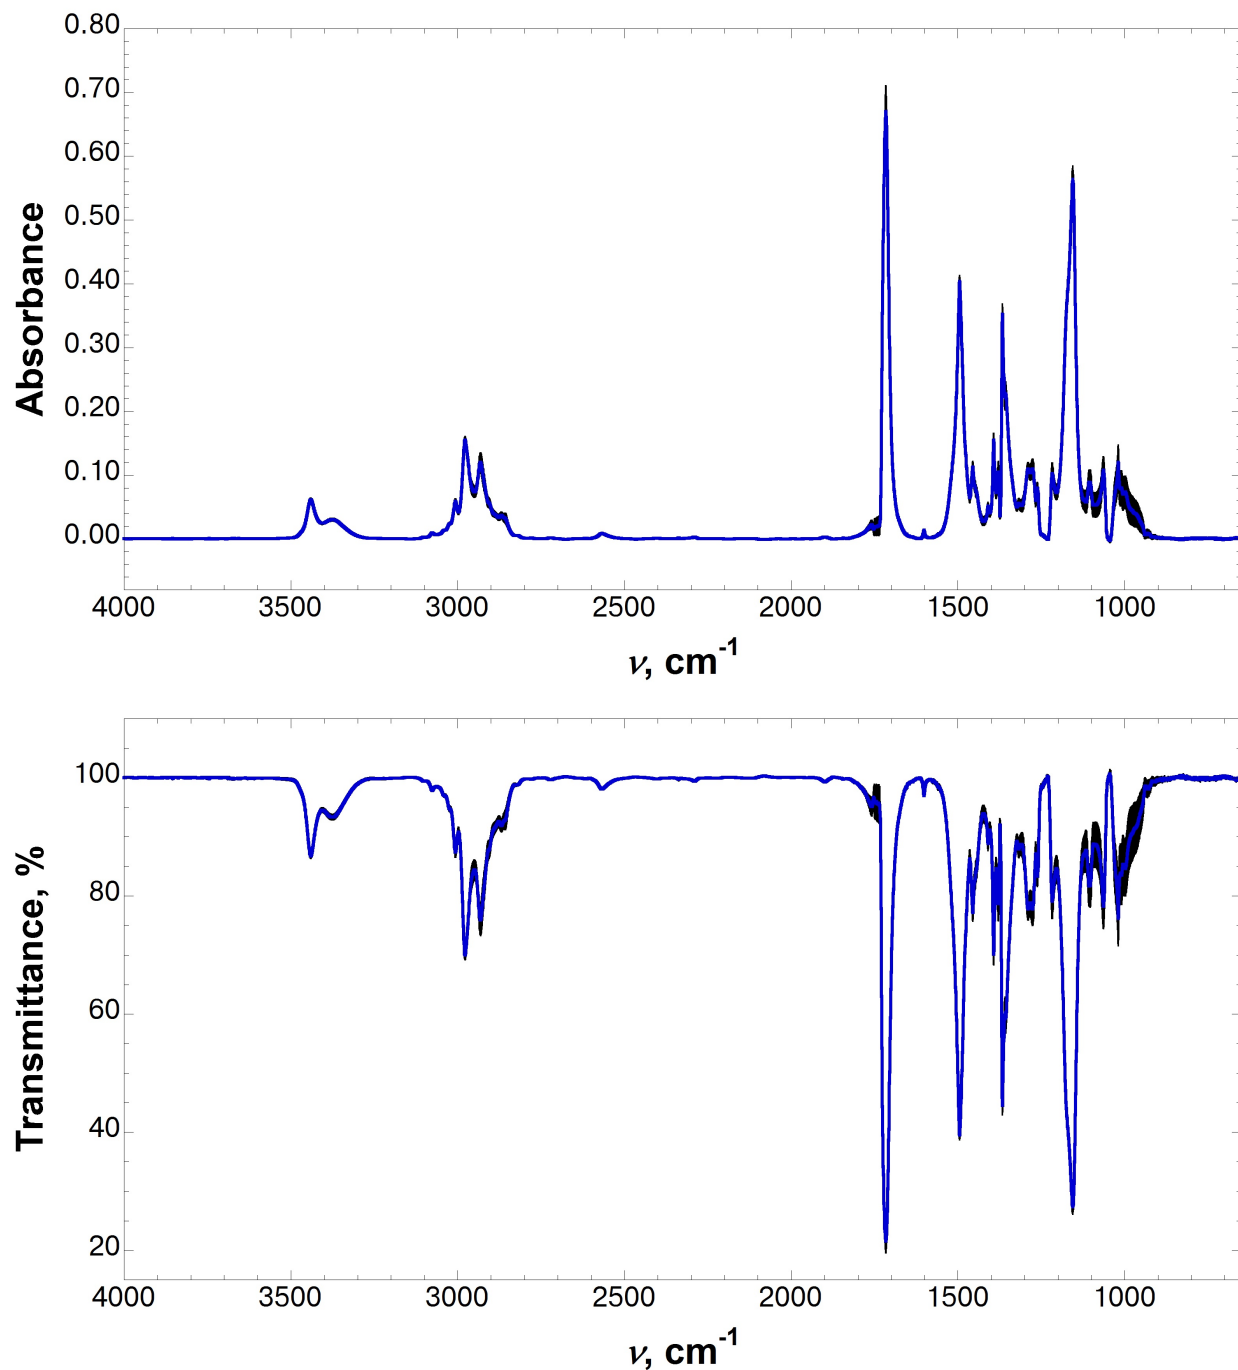

**Figure S6.** FT-IR spectrum of **1**, Boc-L-4-thiophenylalanine *tert*-butyl ester (200 mM) in 25% ethyl acetate in  $\text{CCl}_4$ . Three independent spectra were solvent subtracted, baseline corrected, and averaged. Error bars indicate standard error. Top: full IR absorbance spectrum; bottom: full IR transmittance spectrum.  $\nu_{\text{max}}$  of the S-H stretching frequency is  $2567 \text{ cm}^{-1}$ .

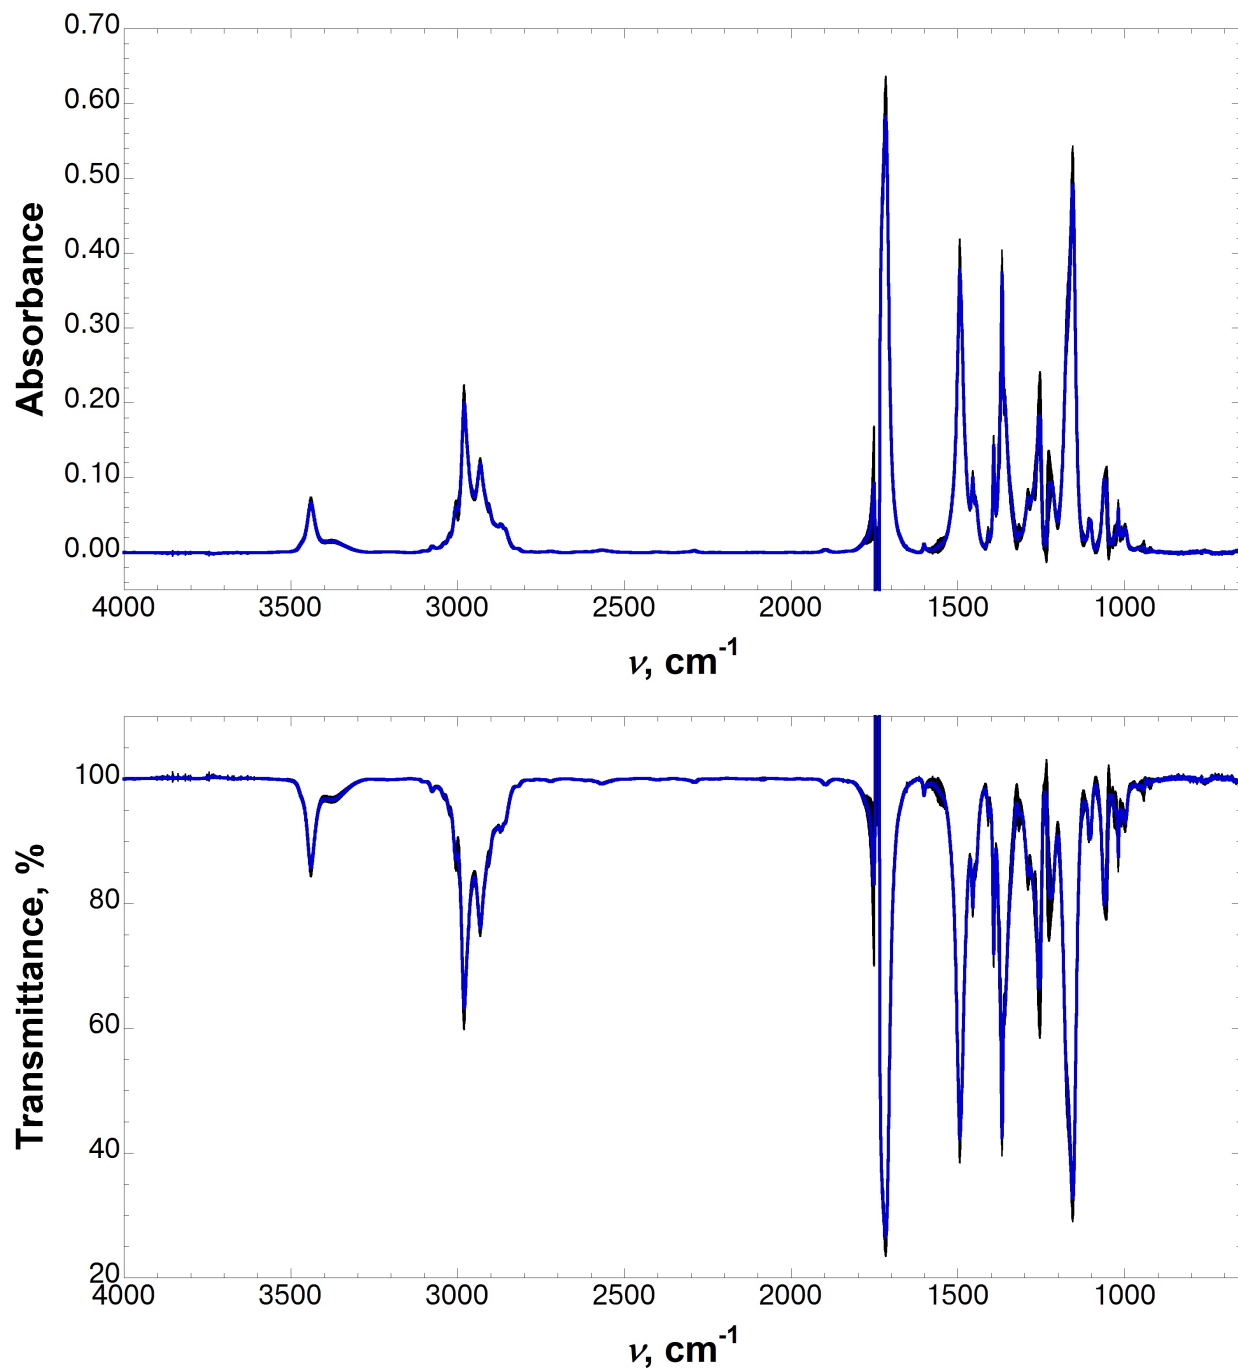

**Figure S7.** FT-IR spectrum of **1**, Boc-L-4-thiophenylalanine *tert*-butyl ester (200 mM) in 10% ethyl acetate in  $\text{CCl}_4$ . Three independent spectra were solvent subtracted, baseline corrected, and averaged. Error bars indicate standard error. Top: full IR absorbance spectrum; bottom: full IR transmittance spectrum.  $\nu_{\text{max}}$  of the S-H stretching frequency is  $2569 \text{ cm}^{-1}$ .

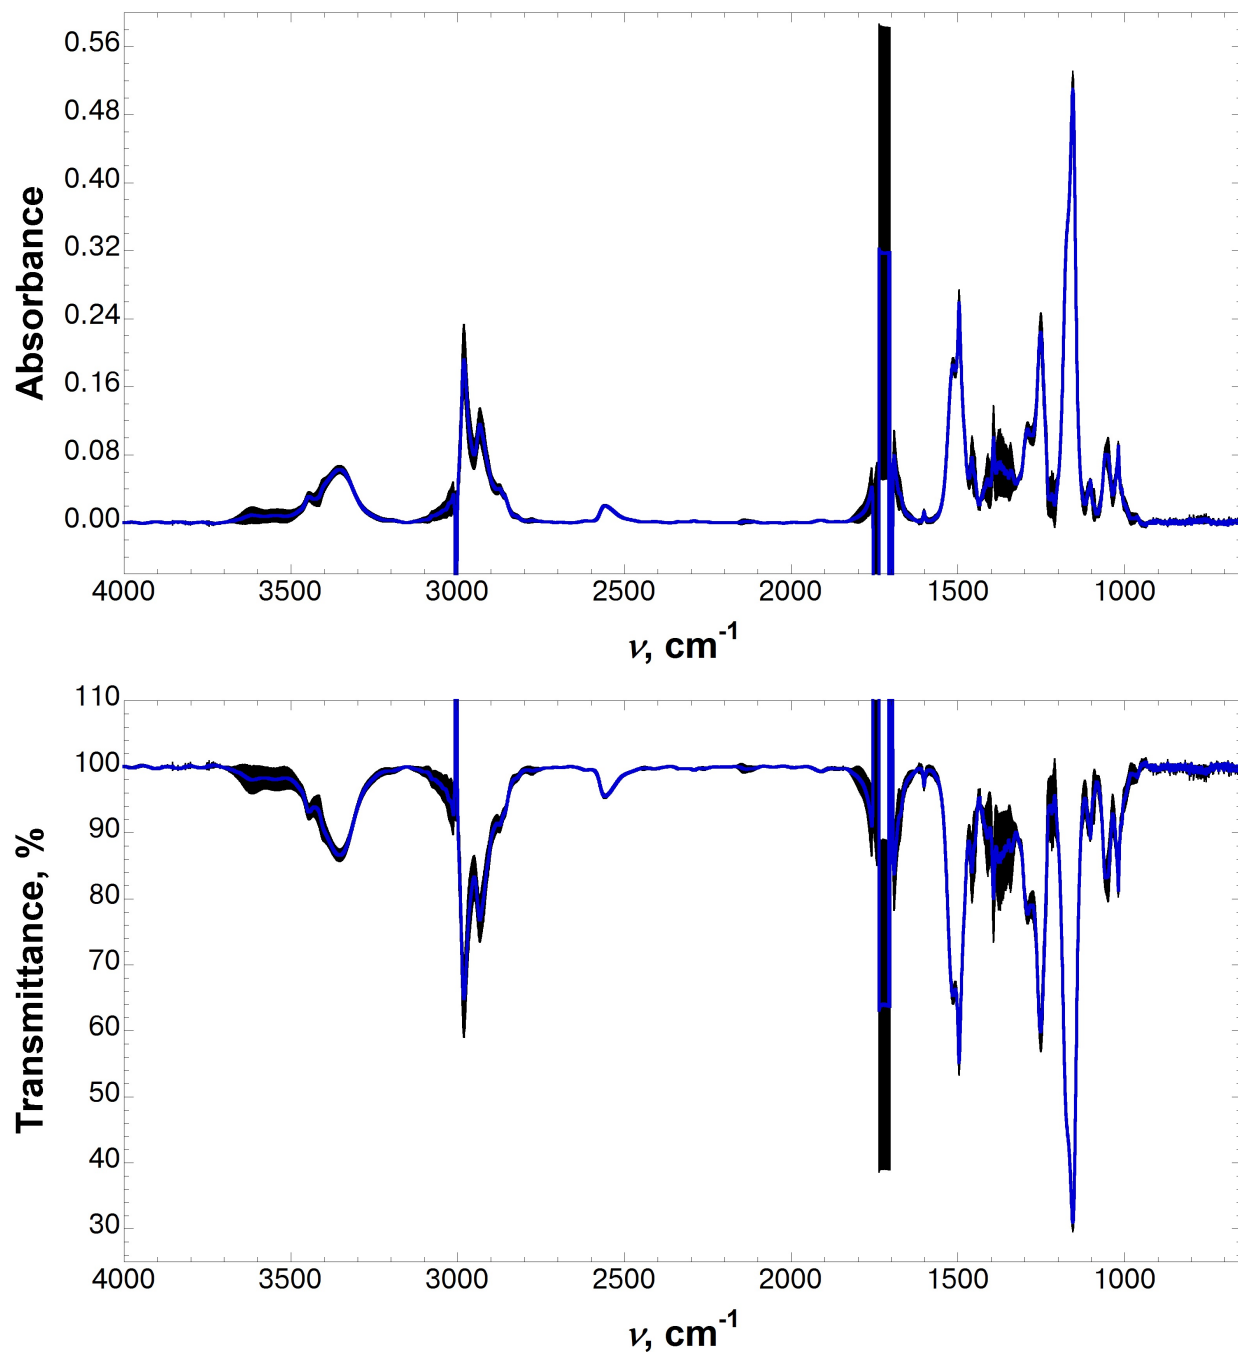

**Figure S8.** FT-IR spectrum of **1**, Boc-L-4-thiolphenylalanine *tert*-butyl ester (200 mM) in acetone. Three independent spectra were solvent subtracted, baseline corrected, and averaged. Error bars indicate standard error. Top: full IR absorbance spectrum; bottom: full IR transmittance spectrum.  $\nu_{\text{max}}$  of the S-H stretching frequency is  $2558 \text{ cm}^{-1}$ .

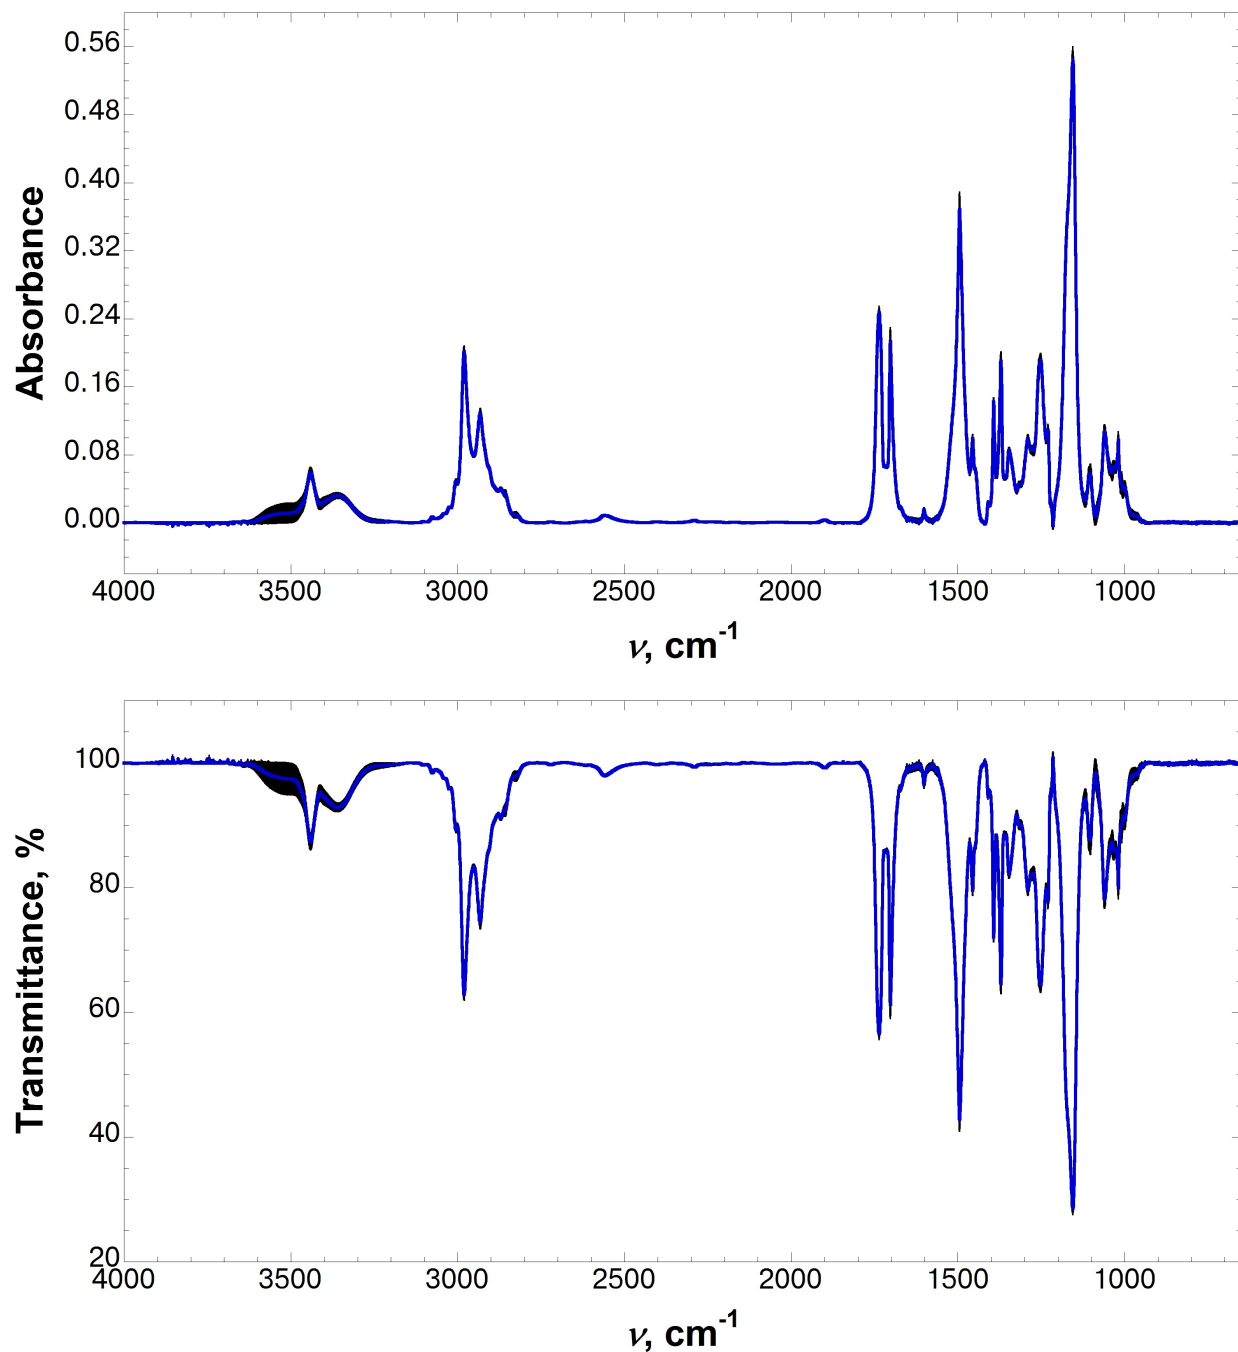

**Figure S9.** FT-IR spectrum of **1**, Boc-L-4-thiophenylalanine *tert*-butyl ester (200 mM) in 25% acetone in  $\text{CCl}_4$ . Three independent spectra were solvent subtracted, baseline corrected, and averaged. Error bars indicate standard error. Top: full IR absorbance spectrum; bottom: full IR transmittance spectrum.  $\nu_{\text{max}}$  of the S-H stretching frequency is  $2559 \text{ cm}^{-1}$ .

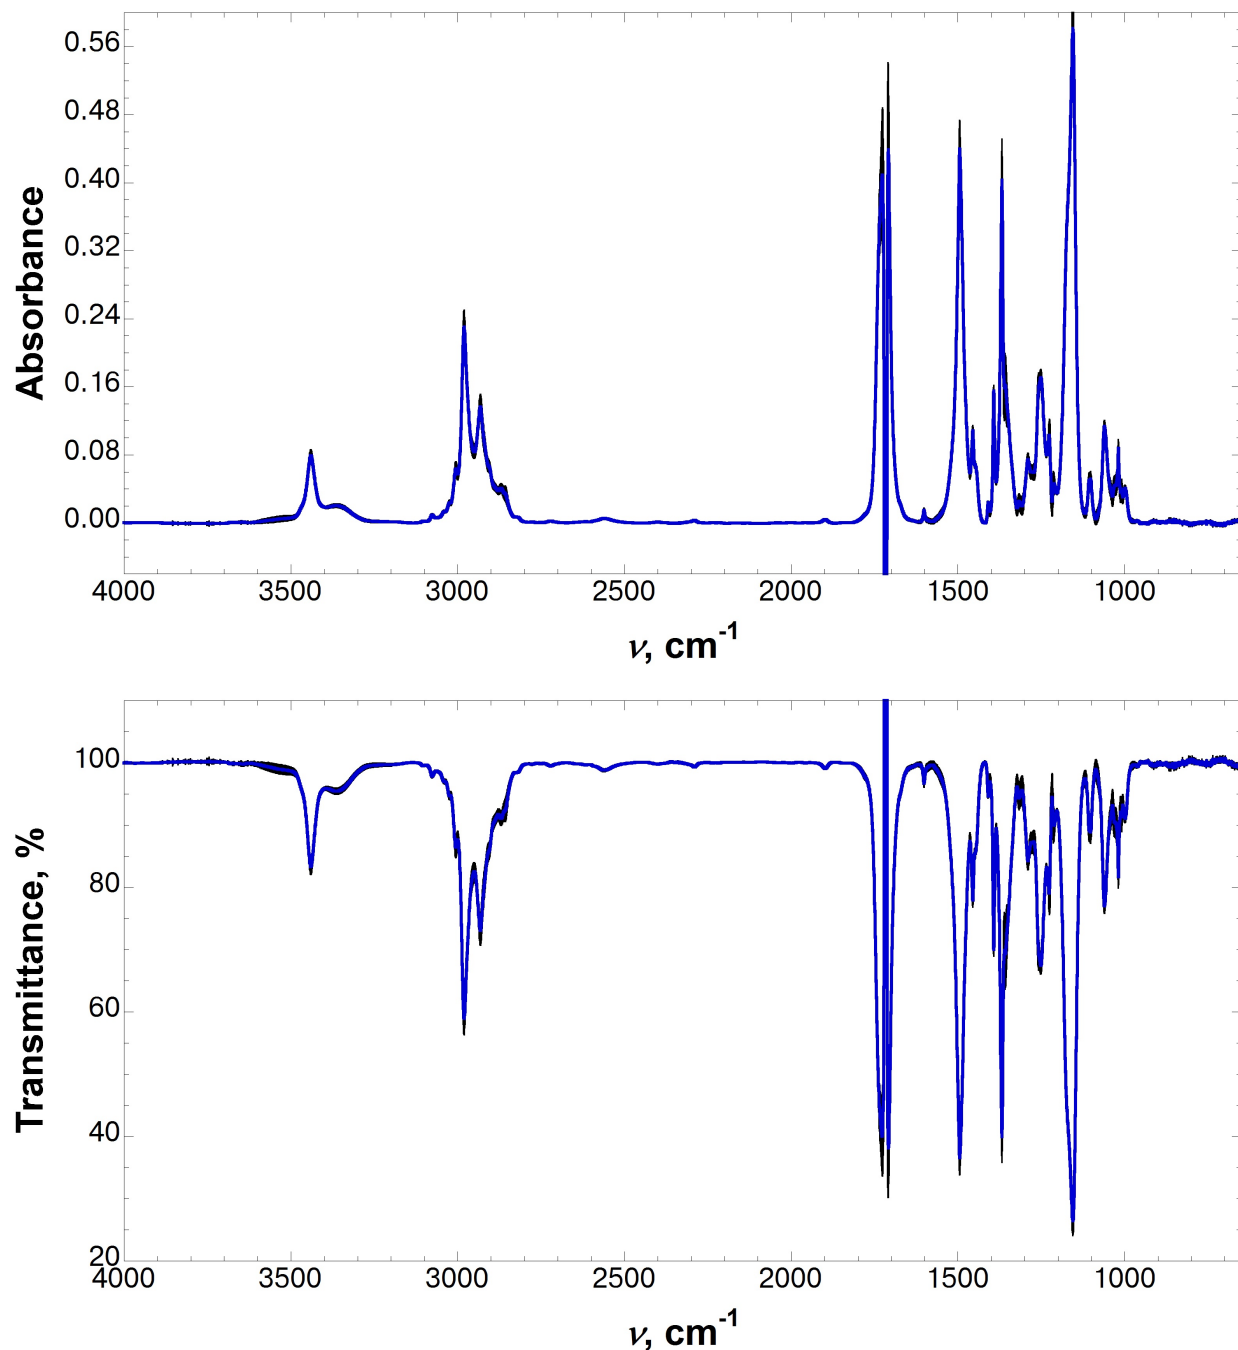

**Figure S10.** FT-IR spectrum of **1**, Boc-L-4-thiolphenylalanine *tert*-butyl ester (200 mM) in 10% acetone in  $\text{CCl}_4$ . Three independent spectra were solvent subtracted, baseline corrected, and averaged. Error bars indicate standard error. Top: full IR absorbance spectrum; bottom: full IR transmittance spectrum.  $\nu_{\text{max}}$  of the S-H stretching frequency is  $2559 \text{ cm}^{-1}$ .

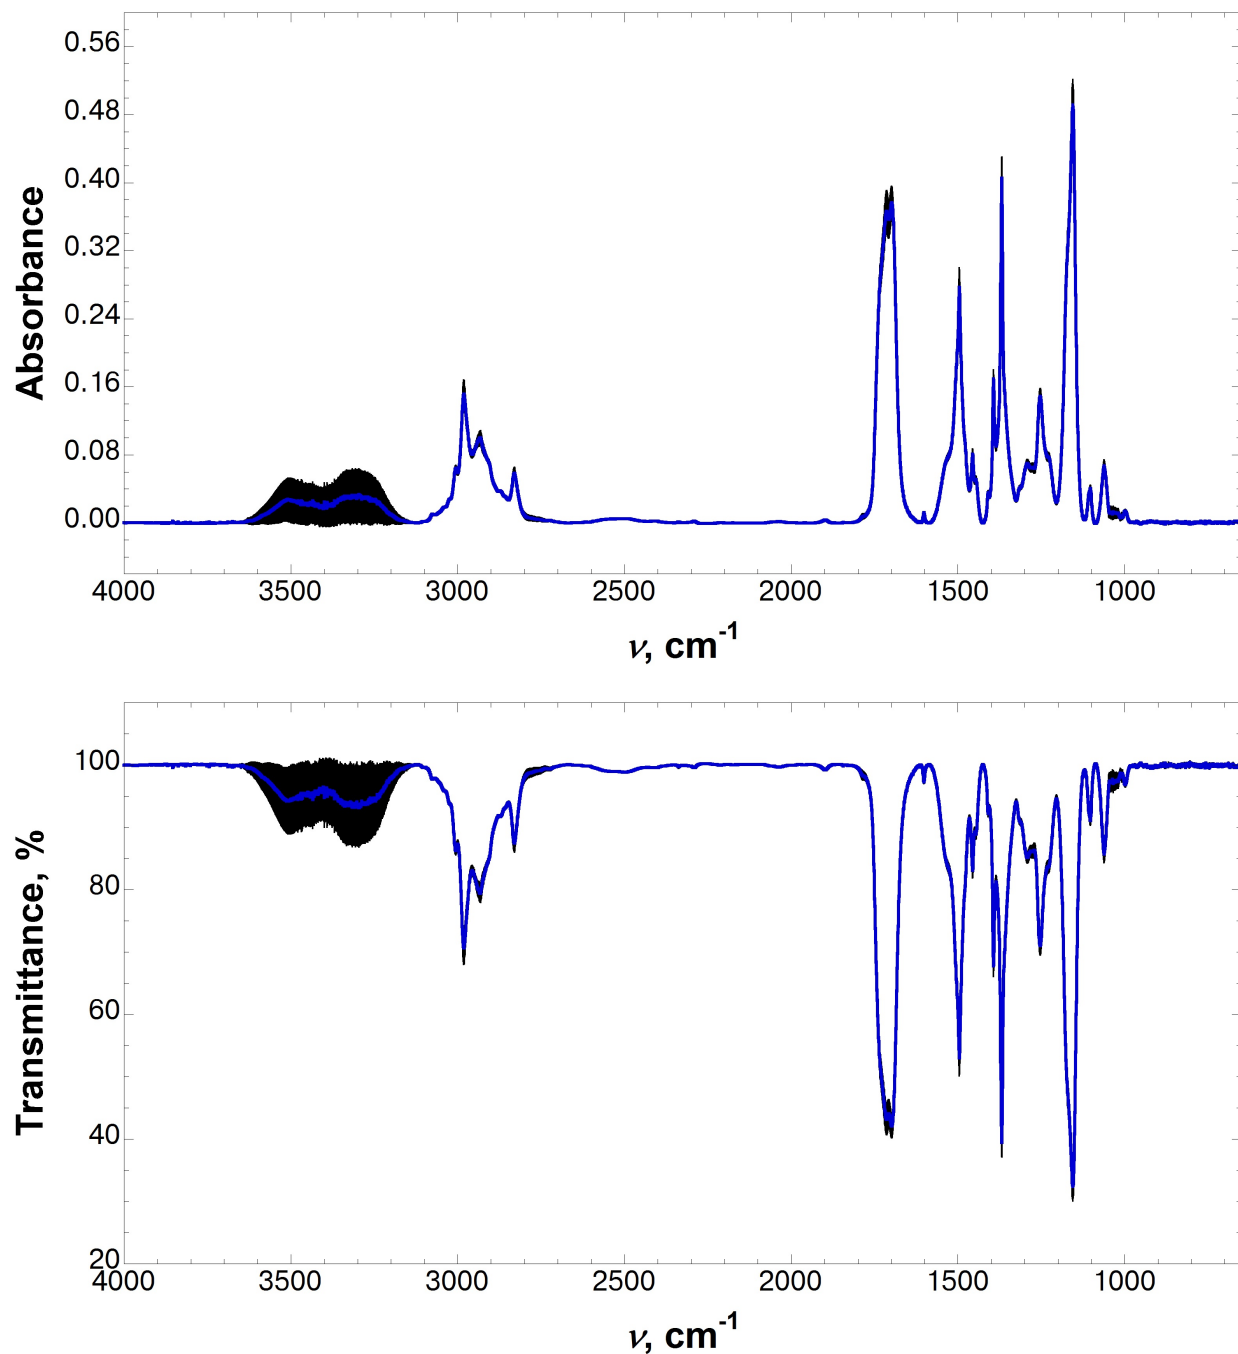

**Figure S11.** FT-IR spectrum of **1**, Boc-L-4-thiolphenylalanine *tert*-butyl ester (200 mM) in 25% methanol in  $\text{CCl}_4$ . Three independent spectra were solvent subtracted, baseline corrected, and averaged. Error bars indicate standard error. Top: full IR absorbance spectrum; bottom: full IR transmittance spectrum.  $\nu_{\text{max}}$  of the S–H stretching frequency is  $2497 \text{ cm}^{-1}$ .



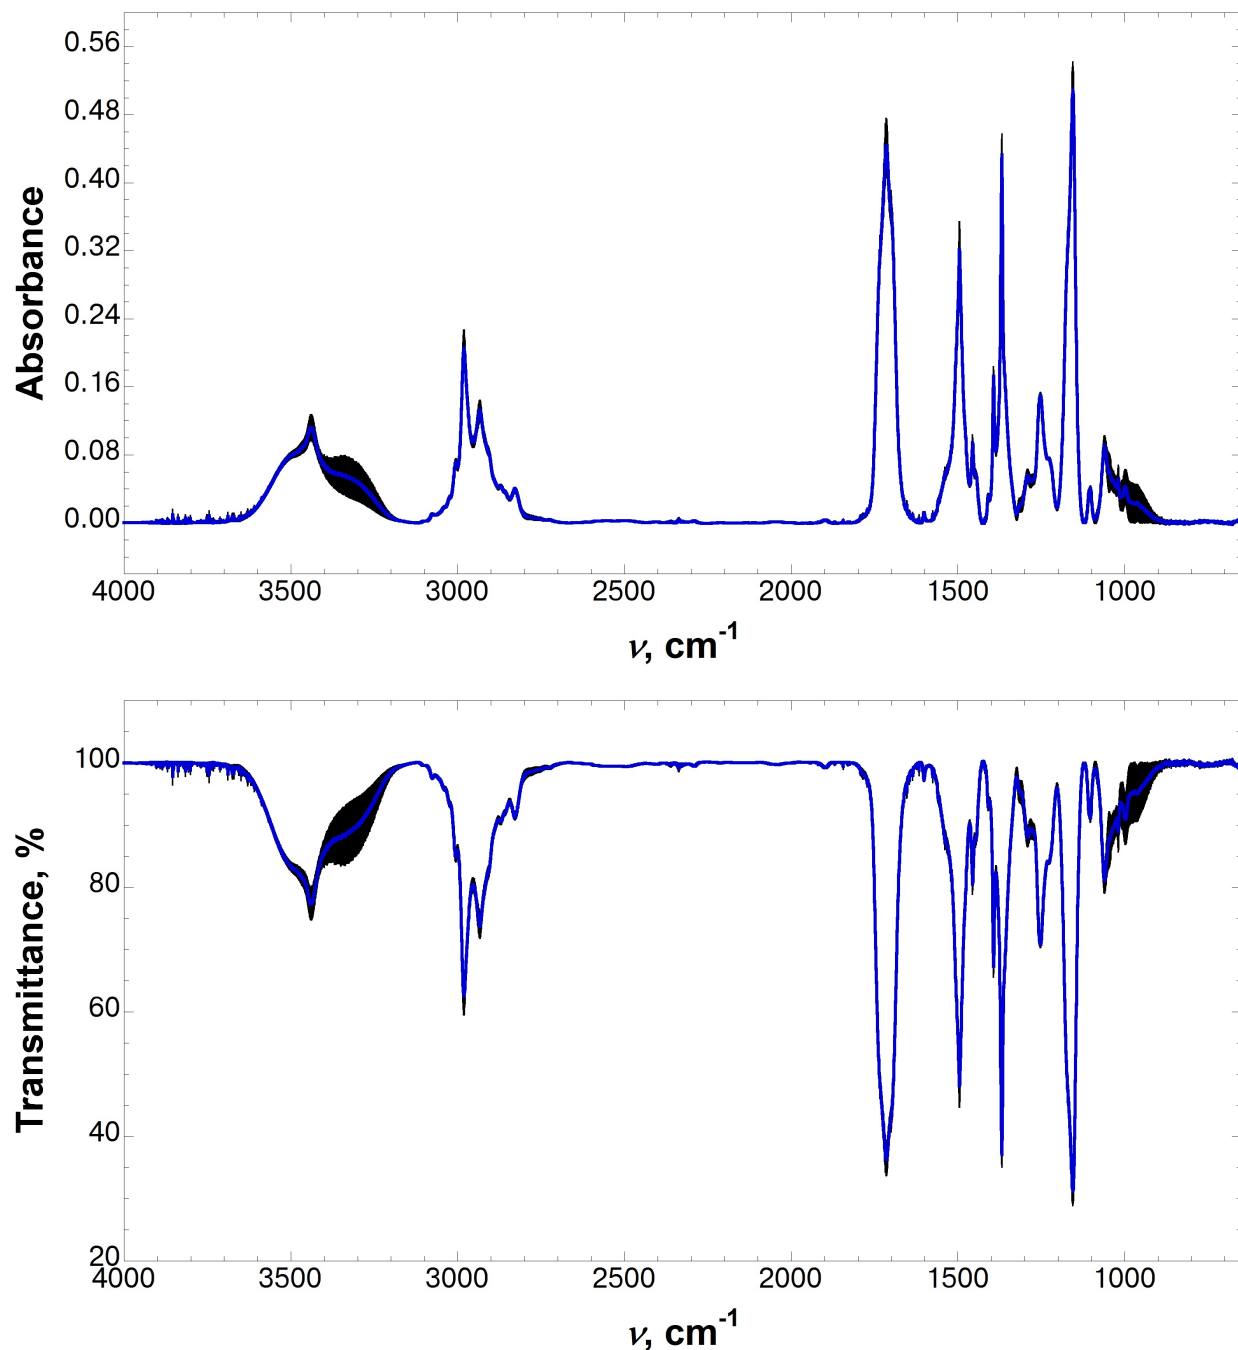

**Figure S12.** FT-IR spectrum of **1**, Boc-L-4-thiophenylalanine *tert*-butyl ester (200 mM) in 10% methanol in  $\text{CCl}_4$ . Three independent spectra were solvent subtracted, baseline corrected, and averaged. Error bars indicate standard error. Top: full IR absorbance spectrum; bottom: full IR transmittance spectrum. Values for  $\nu_{\text{max}}$  which are consistent with the S-H stretching frequency are 2554  $\text{cm}^{-1}$  and 2499  $\text{cm}^{-1}$ .

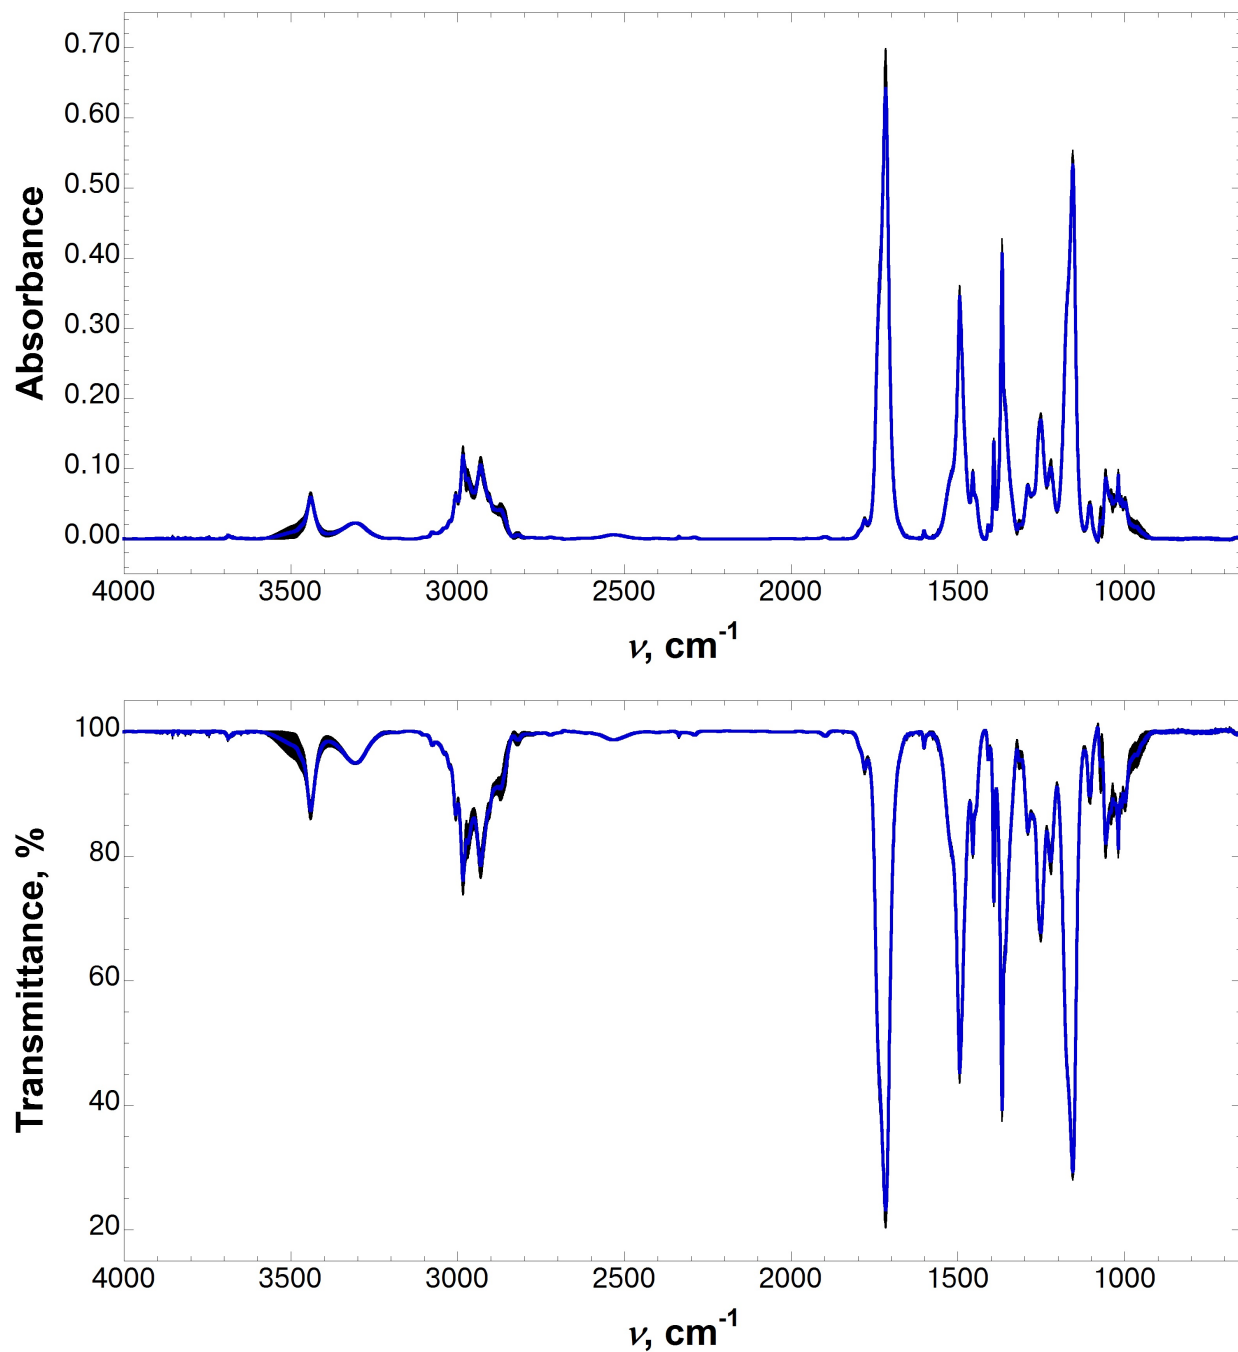

**Figure S13.** FT-IR spectrum of **1**, Boc-L-4-thiolphenylalanine *tert*-butyl ester (200 mM) in 25% THF in  $\text{CCl}_4$ . Three independent spectra were solvent subtracted, baseline corrected, and averaged. Error bars indicate standard error. Top: full IR absorbance spectrum; bottom: full IR transmittance spectrum.  $\nu_{\text{max}}$  of the S-H stretching frequency is  $2534 \text{ cm}^{-1}$ .

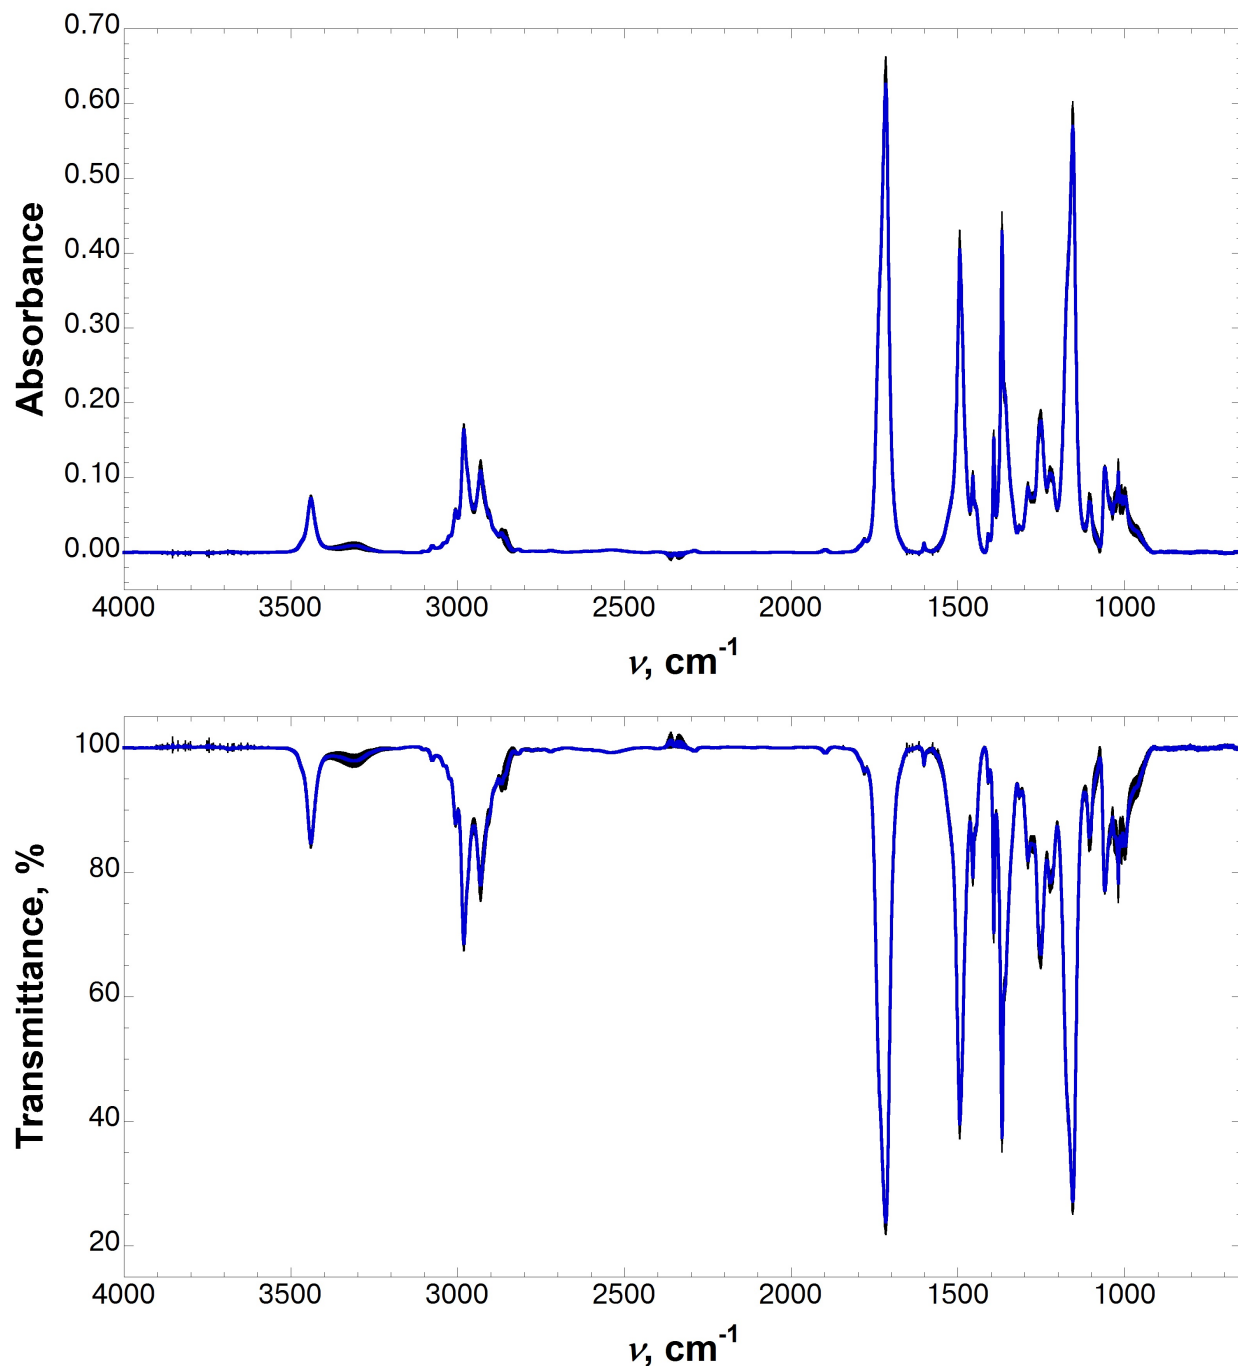

**Figure S14.** FT-IR spectrum of **1**, Boc-L-4-thiolphenylalanine *tert*-butyl ester (200 mM) in 10% THF in  $\text{CCl}_4$ . Three independent spectra were solvent subtracted, baseline corrected, and averaged. Error bars indicate standard error. Top: full IR absorbance spectrum; bottom: full IR transmittance spectrum.  $\nu_{\text{max}}$  of the S-H stretching frequency is  $2541 \text{ cm}^{-1}$ .

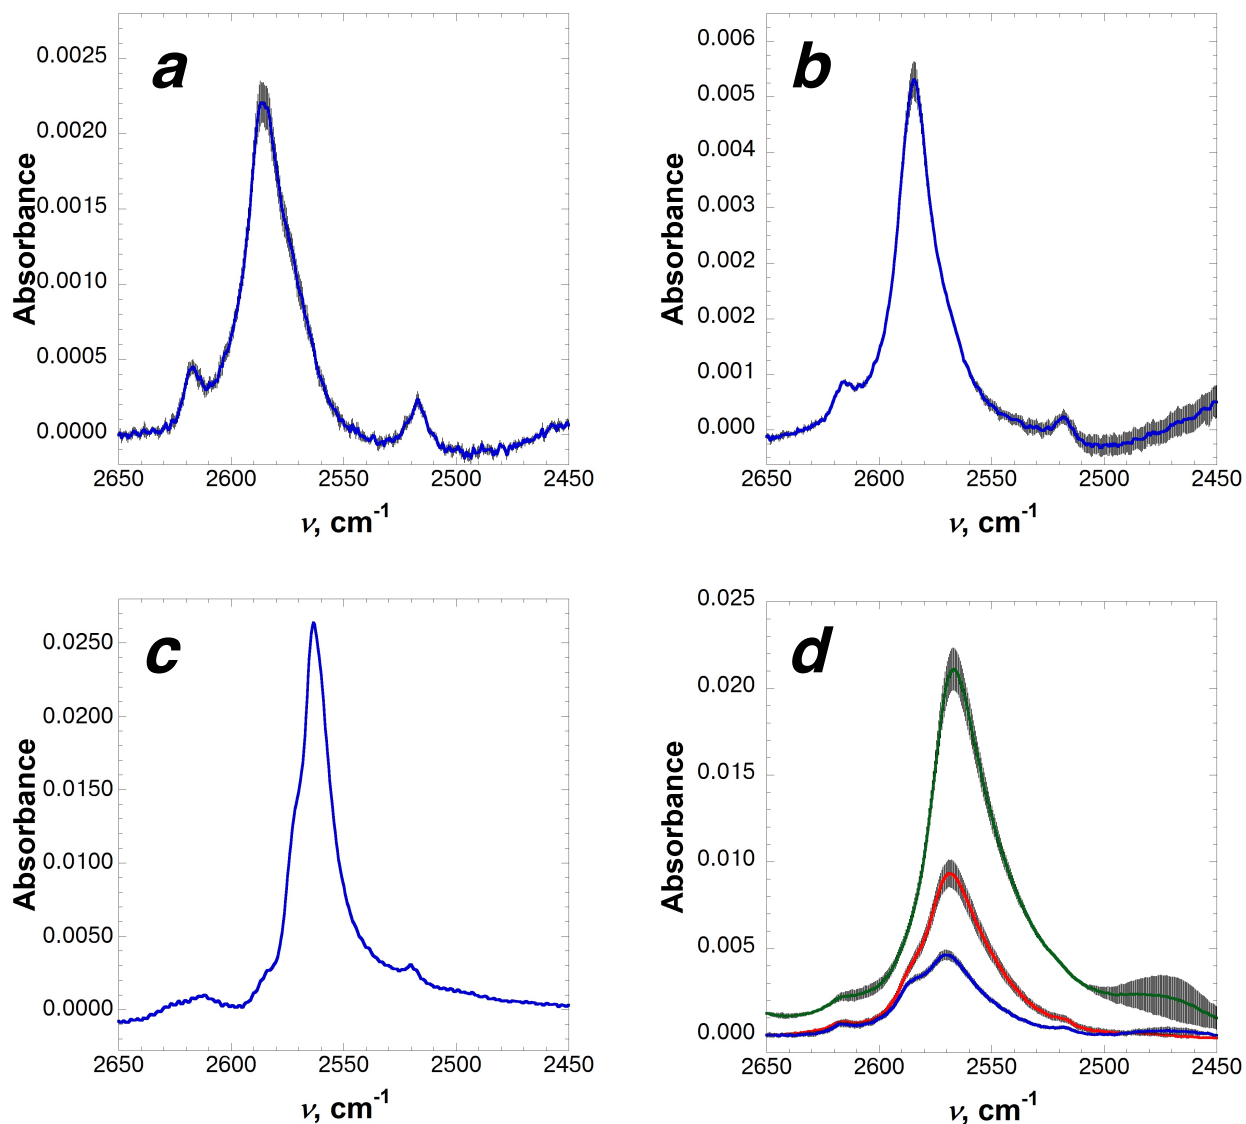

**Figure S15.** FT-IR spectrum of the S–H stretching region of *p*-thiocresol (200 mM) in (a)  $\text{CCl}_4$ , (b)  $\text{CHCl}_3$ , (c) crystalline form, or (d) ethyl acetate in  $\text{CCl}_4$  (green, 100% ethyl acetate; red, 25% ethyl acetate; blue, 10% ethyl acetate). Error bars indicate standard error.  $\nu_{\text{max}}$  and signal intensity are reported in Table S8.

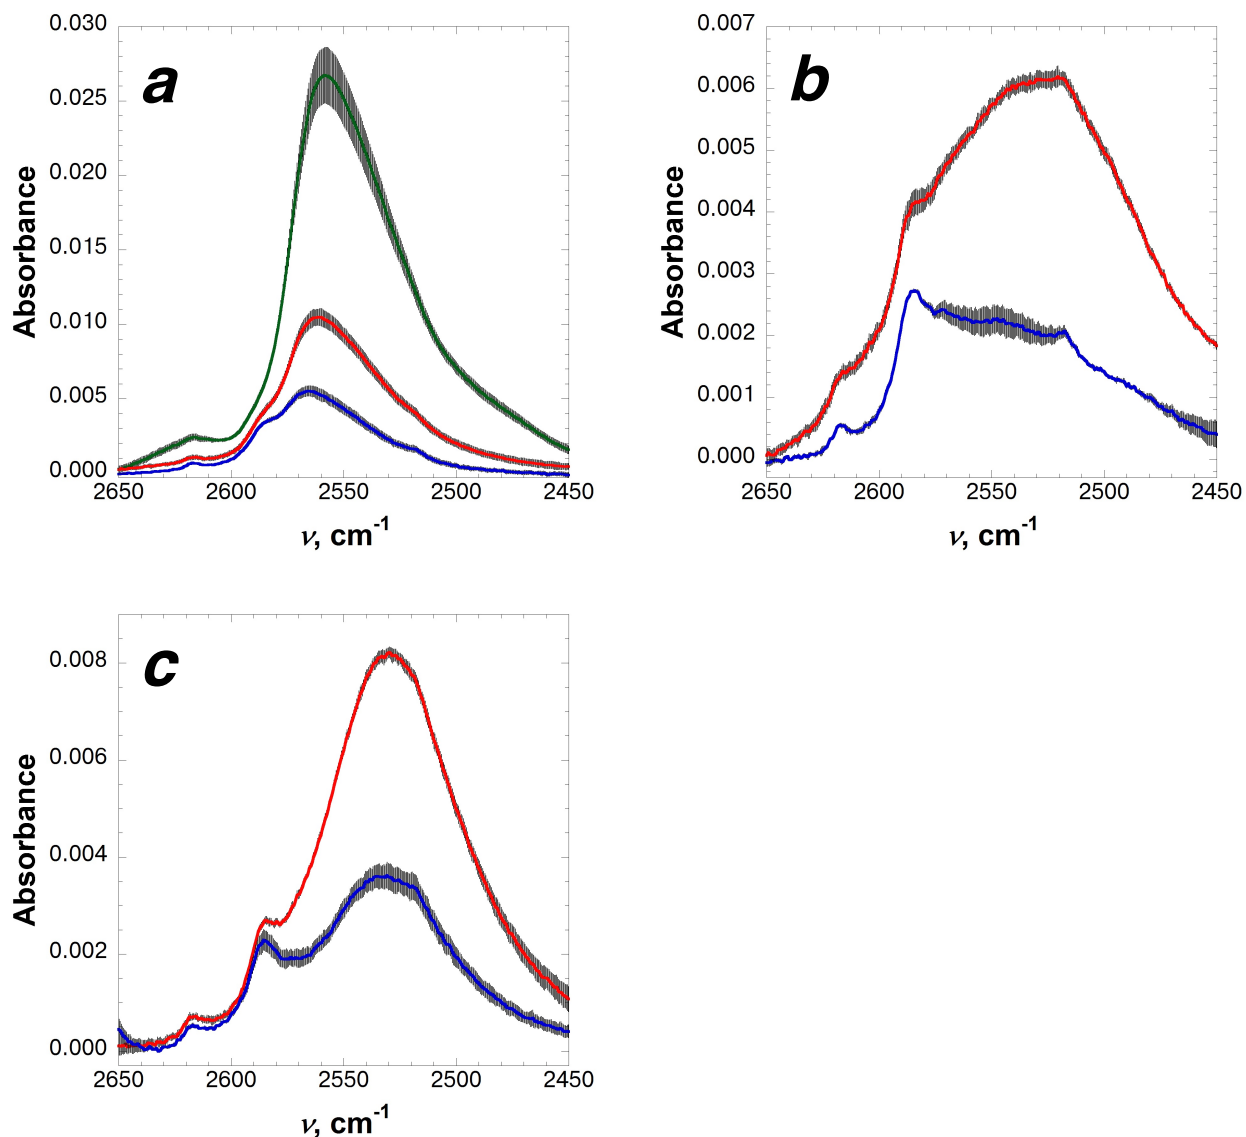

**Figure S16.** FT-IR spectrum of the S–H stretching region of *p*-thiocresol (200 mM). Right: *p*-thiocresol in solutions of acetone in CCl<sub>4</sub> (green, 100% acetone; red, 25% acetone; blue, 10% acetone); (b) methanol in CCl<sub>4</sub> (red, 25% methanol; blue, 10% methanol); or (c) THF in CCl<sub>4</sub> (red, 25% THF; blue, 10% THF). Error bars indicate standard error.  $\nu_{\max}$  and signal intensity are reported in Table S8.

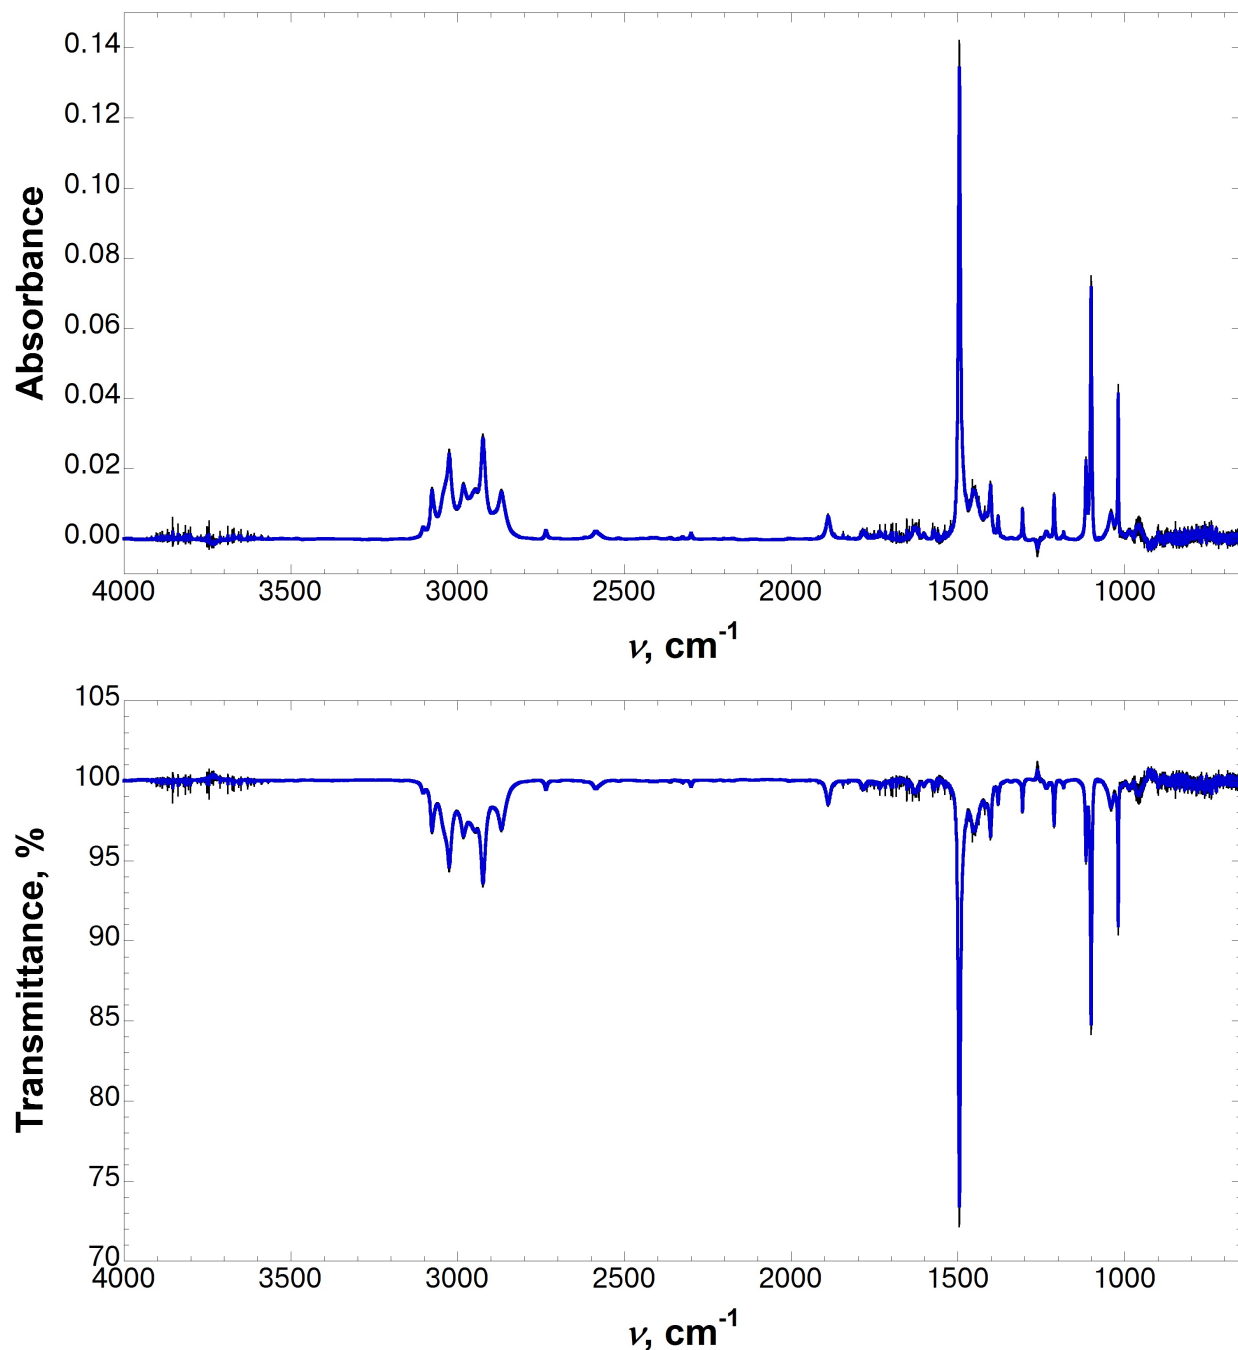

**Figure S17.** FT-IR spectra of *p*-thiocresol (200 mM) in CCl<sub>4</sub>. Four independent spectra were solvent subtracted, baseline corrected, and averaged. Error bars indicate standard error. Top: full IR absorbance spectrum; bottom: full IR transmittance spectrum.  $\nu_{\max}$  of the S-H stretching frequency is 2586 cm<sup>-1</sup>.

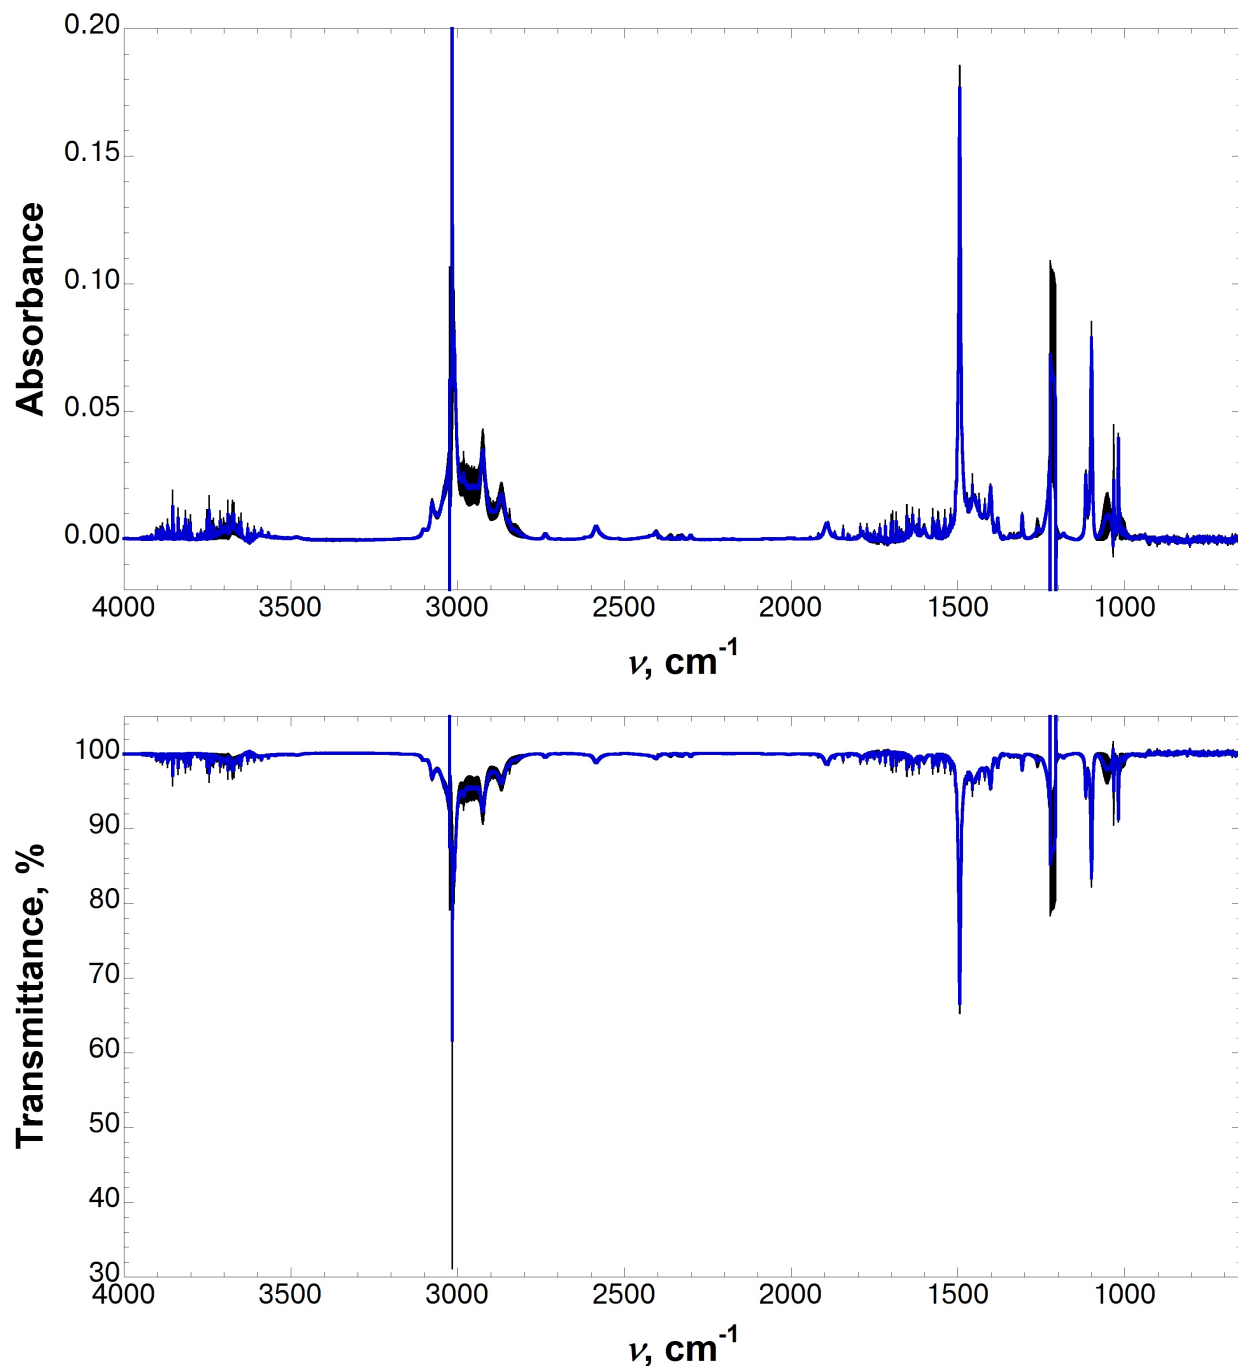

**Figure S18.** FT-IR spectrum of *p*-thiocresol (200 mM) in  $\text{CHCl}_3$ . Three independent spectra were solvent subtracted, baseline corrected, and averaged. Error bars indicate standard error. Top: full IR absorbance spectrum; bottom: full IR transmittance spectrum.  $\nu_{\text{max}}$  of the S–H stretching frequency is  $2585 \text{ cm}^{-1}$ .

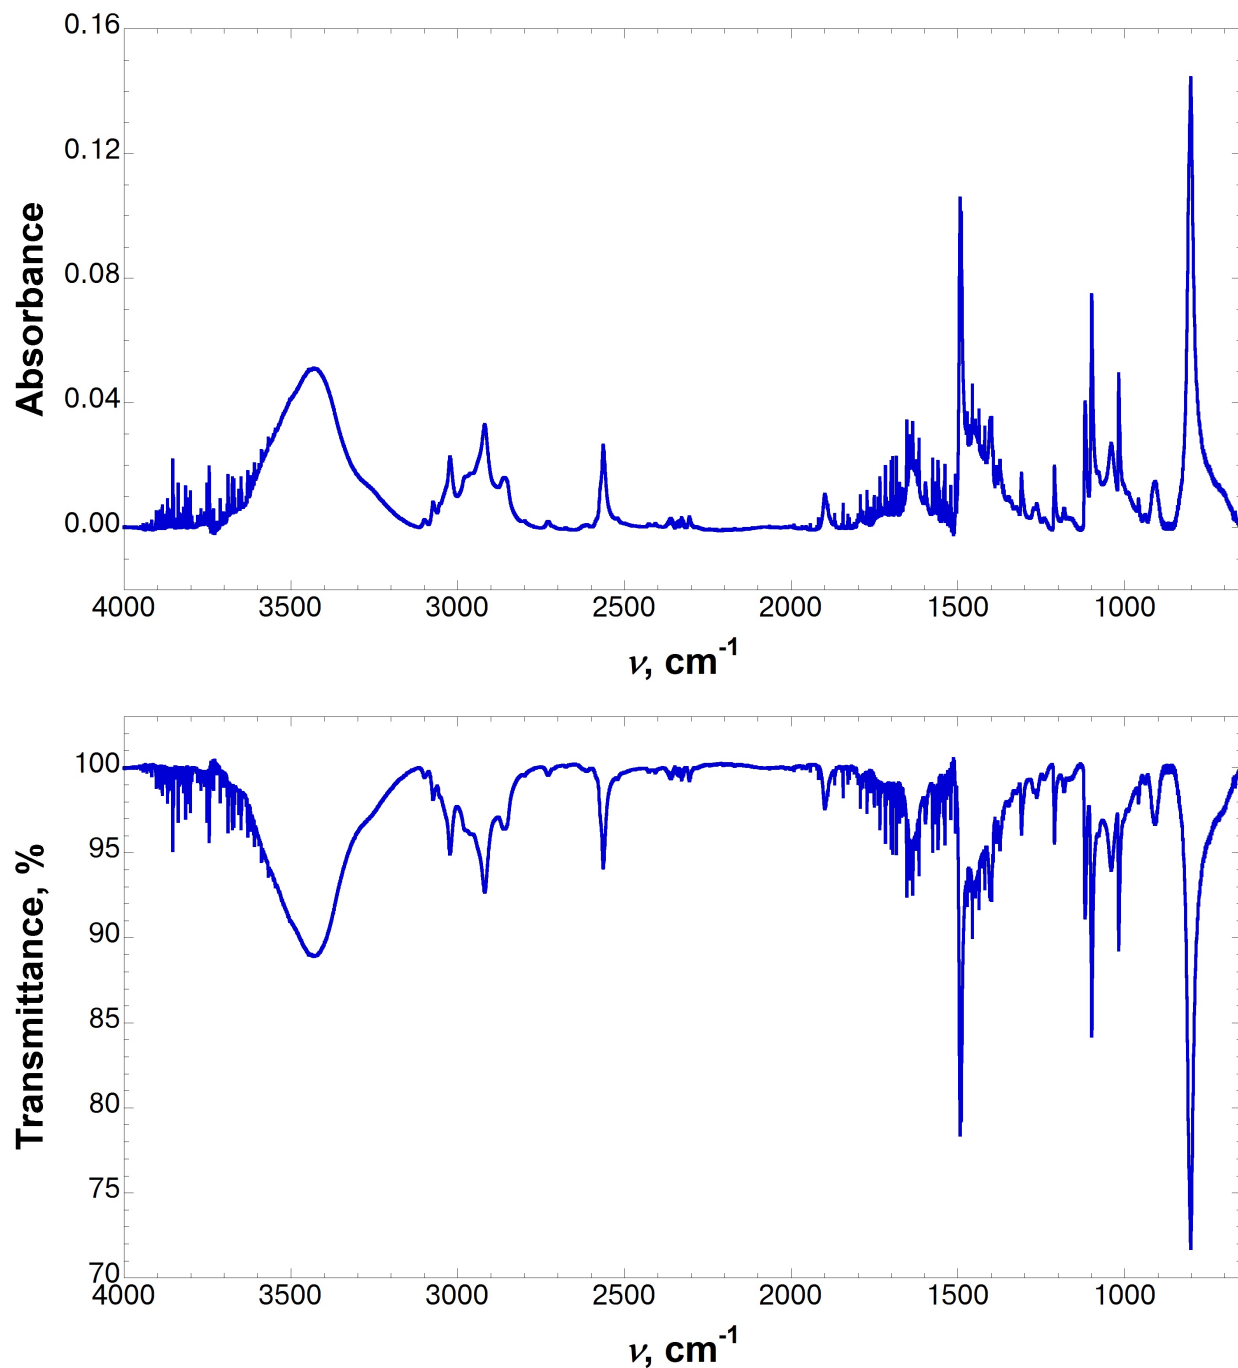

**Figure S19.** FT-IR spectrum of crystalline *p*-thiocresol in a pressed KBr pellet. Crystalline *p*-thiocresol was not recrystallized, and was used as purchased. The spectrum was baseline corrected. Top: full IR absorbance spectrum; bottom: full IR transmittance spectrum.  $\nu_{\text{max}}$  of the S-H stretching frequency is 2563  $\text{cm}^{-1}$ .



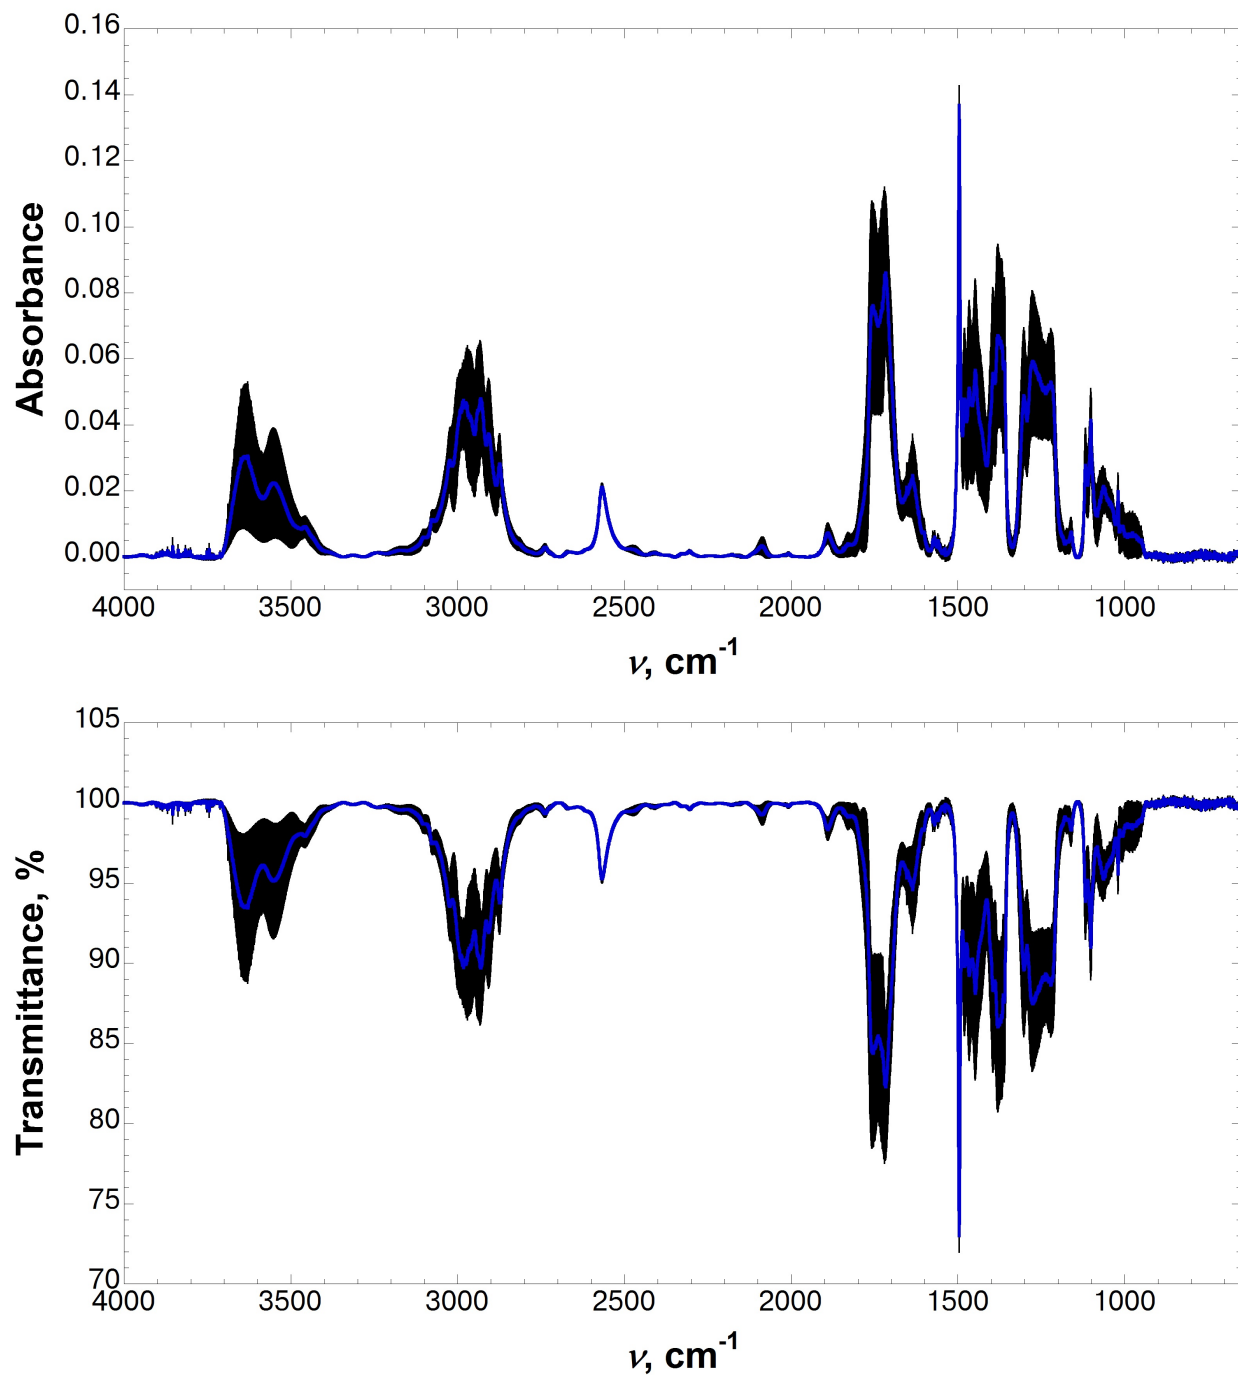

**Figure S20.** FT-IR spectrum of *p*-thiocresol (200 mM) in ethyl acetate. Three independent spectra were solvent subtracted, baseline corrected, and averaged. Error bars indicate standard error. Top: full IR absorbance spectrum; bottom: full IR transmittance spectrum.  $\nu_{\text{max}}$  of the S–H stretching frequency is 2567  $\text{cm}^{-1}$ .

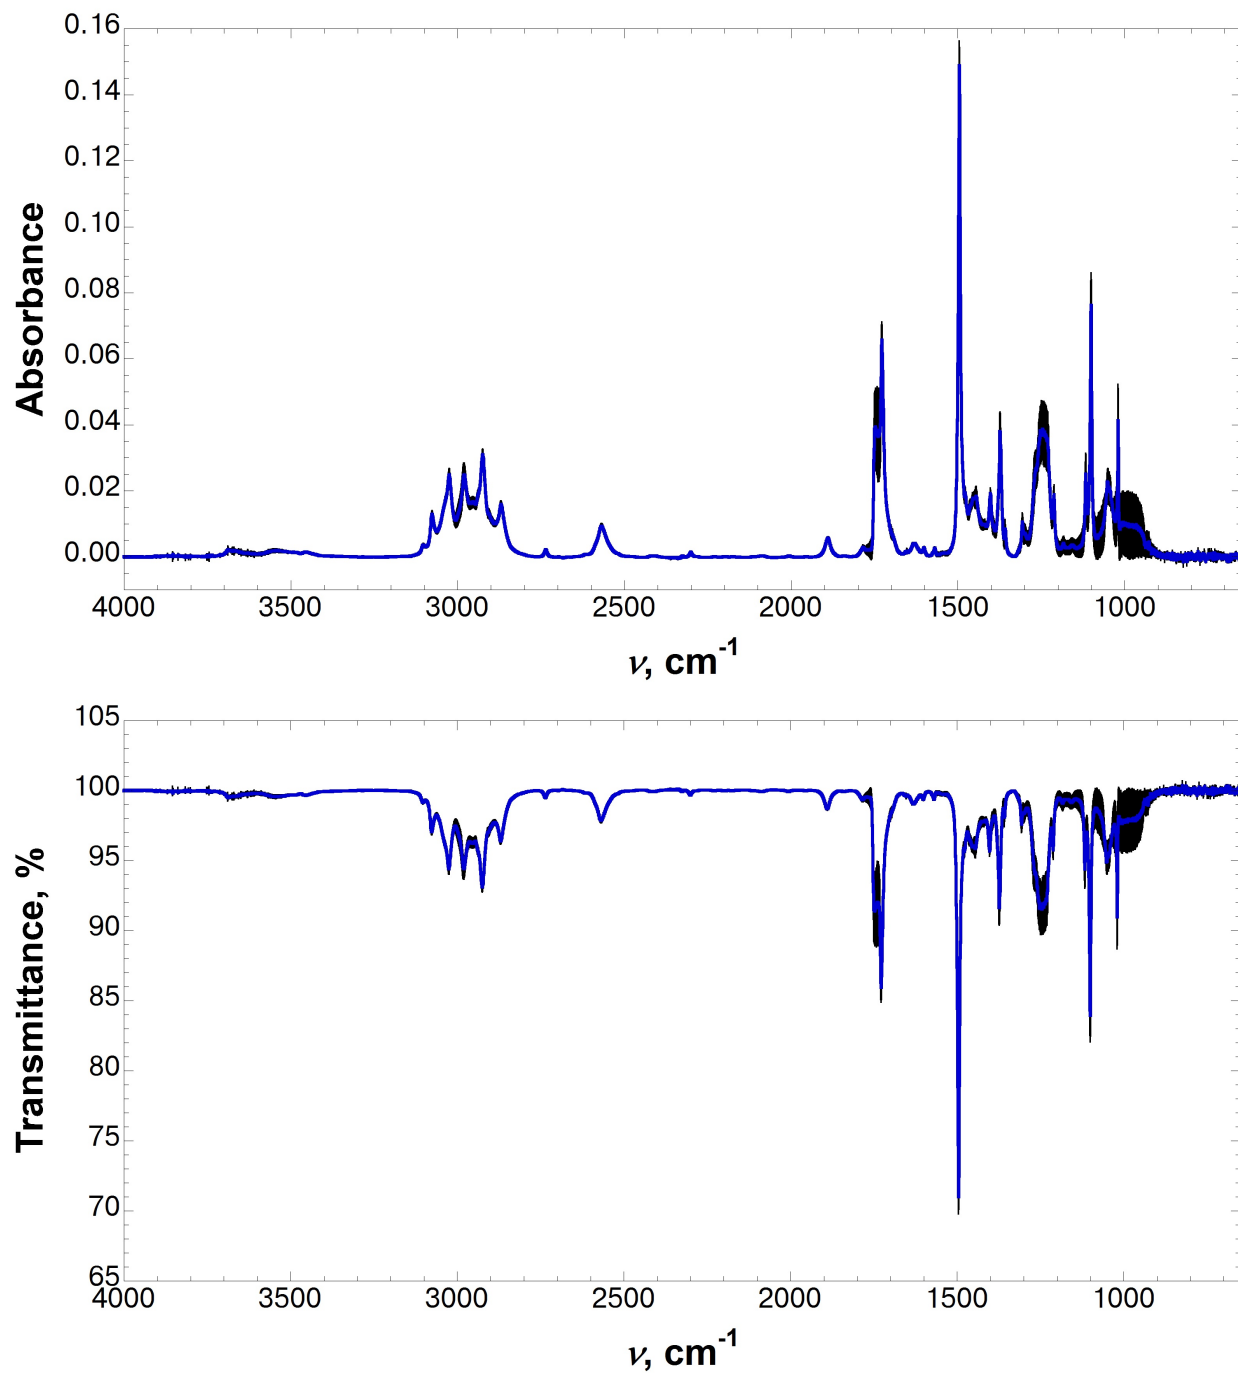

**Figure S21.** FT-IR spectrum of *p*-thiocresol (200 mM) in 25% ethyl acetate in  $\text{CCl}_4$ . Three independent spectra were solvent subtracted, baseline corrected, and averaged. Error bars indicate standard error. Top: full IR absorbance spectrum; bottom: full IR transmittance spectrum.  $\nu_{\text{max}}$  of the S–H stretching frequency is 2569  $\text{cm}^{-1}$ .

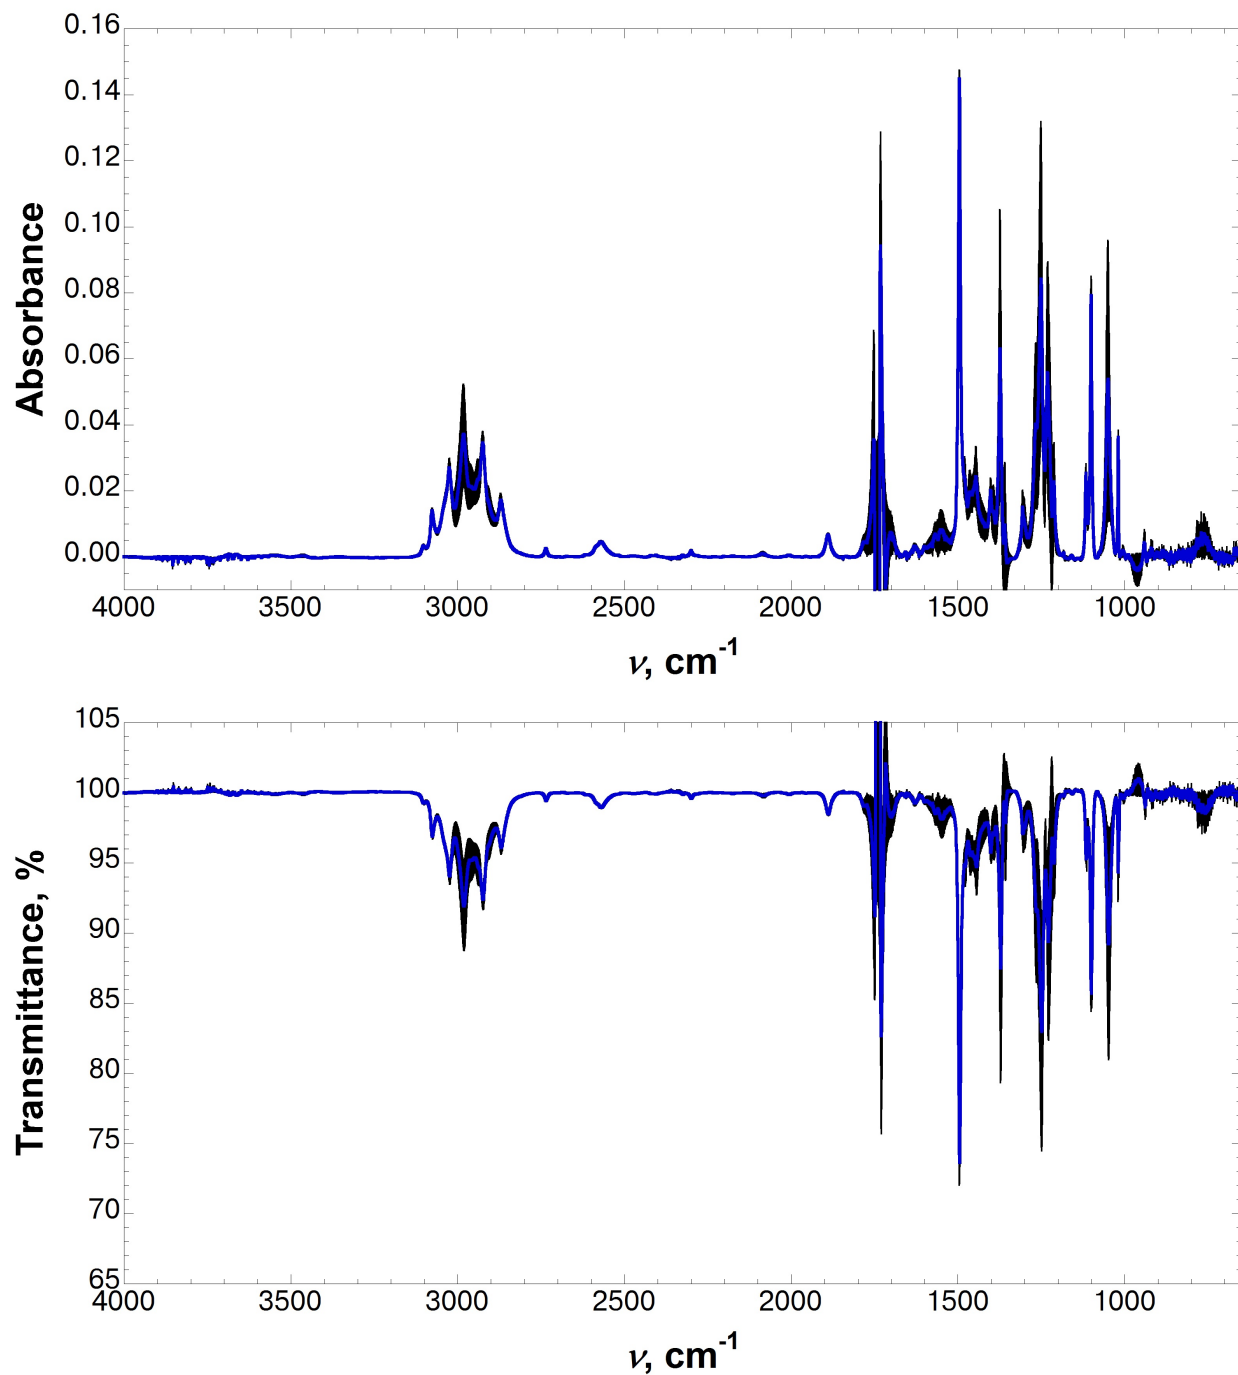

**Figure S22.** FT-IR spectrum of *p*-thiocresol (200 mM) in 10% ethyl acetate in  $\text{CCl}_4$ . Three independent spectra were solvent subtracted, baseline corrected, and averaged. Error bars indicate standard error. Top: full IR absorbance spectrum; bottom: full IR transmittance spectrum.  $\nu_{\text{max}}$  of the S–H stretching frequency is  $2571 \text{ cm}^{-1}$ .

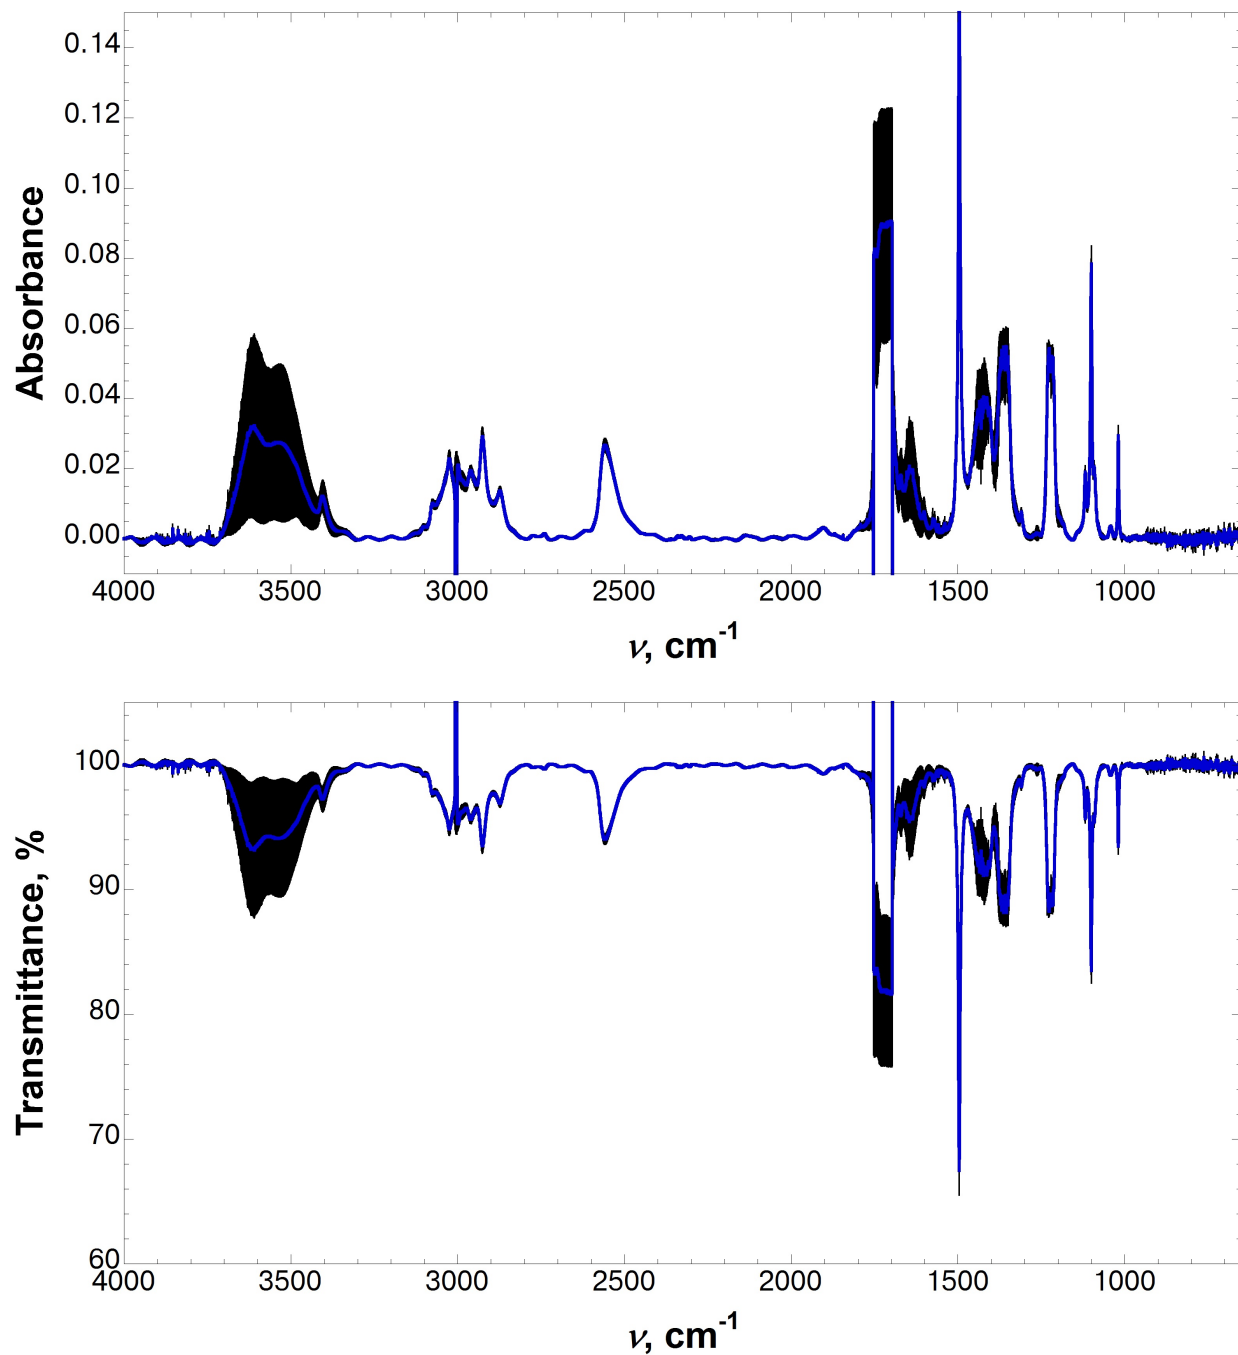

**Figure S23.** FT-IR spectrum of *p*-thiocresol (200 mM) in acetone. Three independent spectra were solvent subtracted, baseline corrected, and averaged. Error bars indicate standard error. Top: full IR absorbance spectrum; bottom: full IR transmittance spectrum.  $\nu_{\text{max}}$  of the S-H stretching frequency is  $2558 \text{ cm}^{-1}$ .

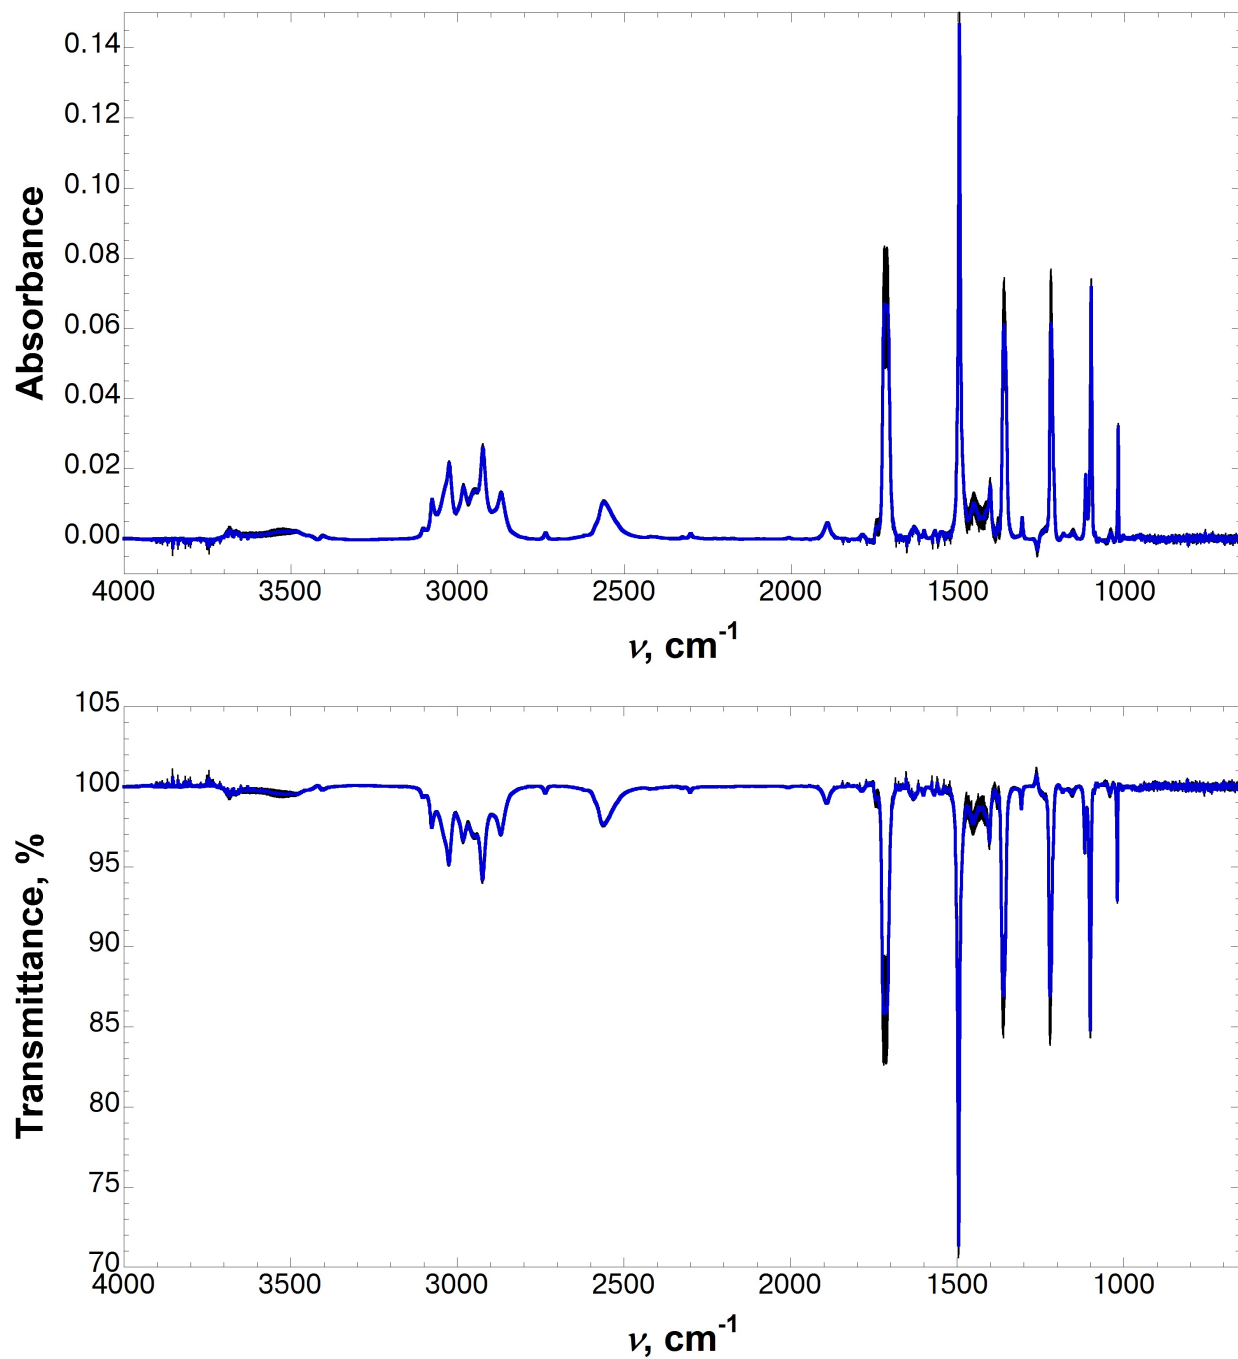

**Figure S24.** FT-IR spectrum of *p*-thiocresol (200 mM) in 25% acetone in  $\text{CCl}_4$ . Three independent spectra were solvent subtracted, baseline corrected, and averaged. Error bars indicate standard error. Top: full IR absorbance spectrum; bottom: full IR transmittance spectrum.  $\nu_{\text{max}}$  of the S–H stretching frequency is 2561  $\text{cm}^{-1}$ .

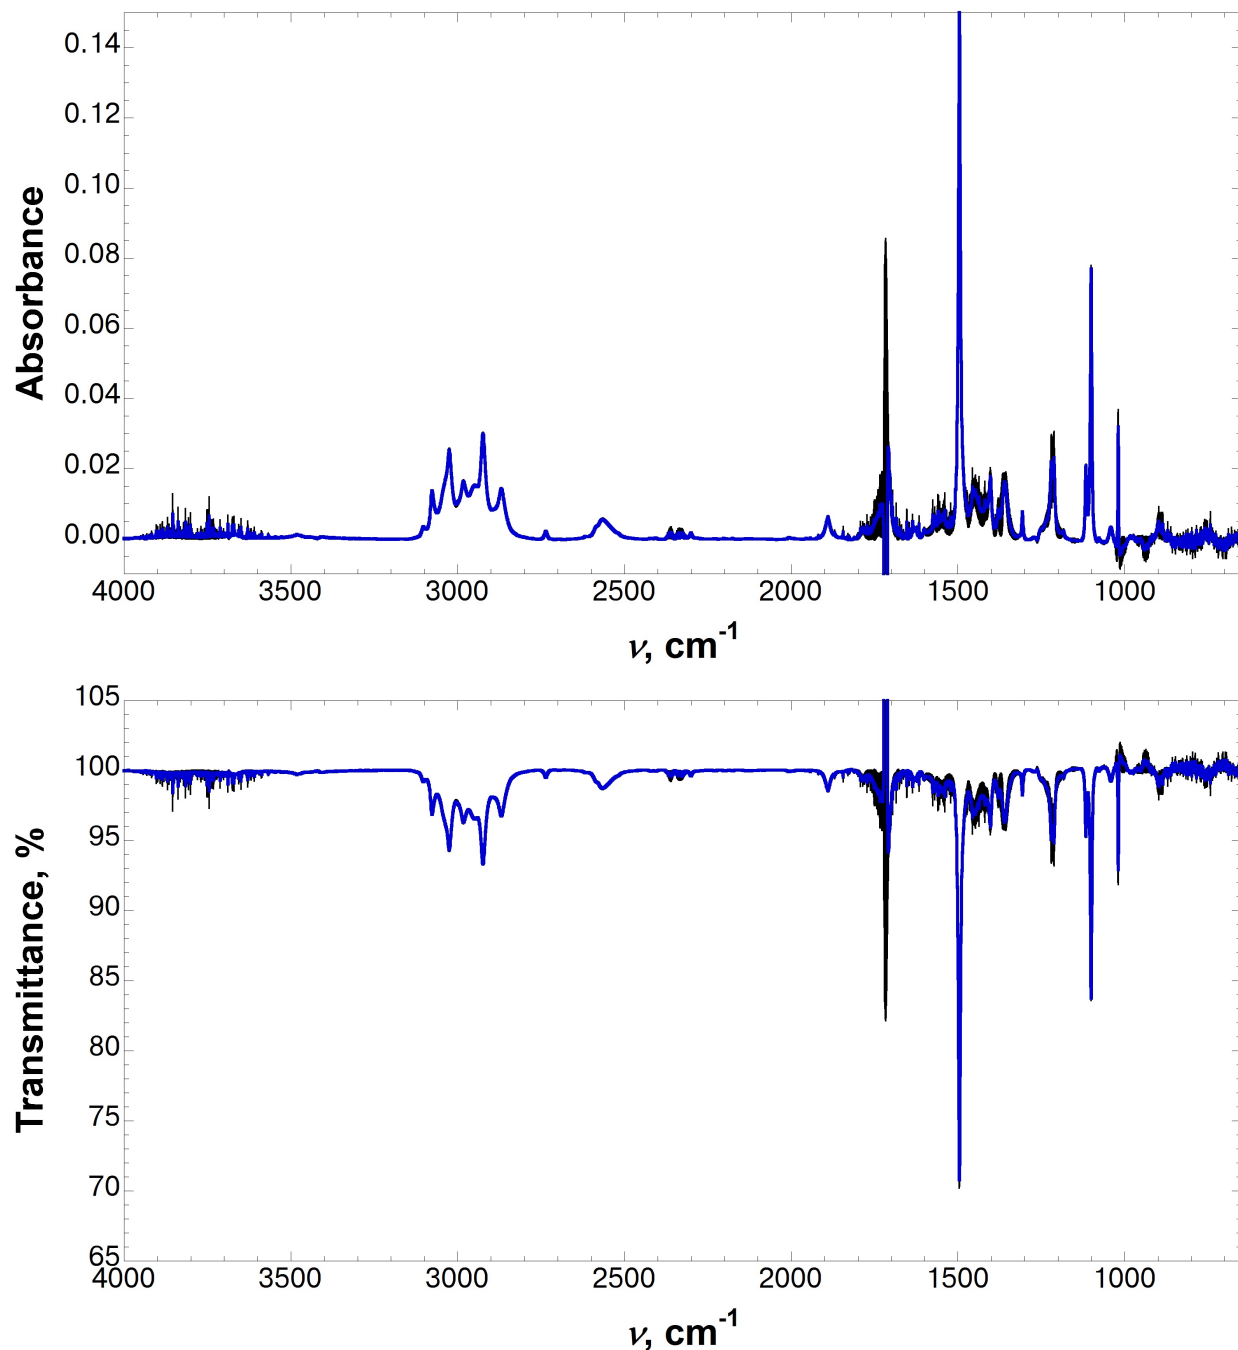

**Figure S25.** FT-IR spectrum of *p*-thiocresol (200 mM) in 10% acetone in  $\text{CCl}_4$ . Three independent spectra were solvent subtracted, baseline corrected, and averaged. Error bars indicate standard error. Top: full IR absorbance spectrum; bottom: full IR transmittance spectrum.  $\nu_{\text{max}}$  of the S-H stretching frequency is 2565  $\text{cm}^{-1}$ .

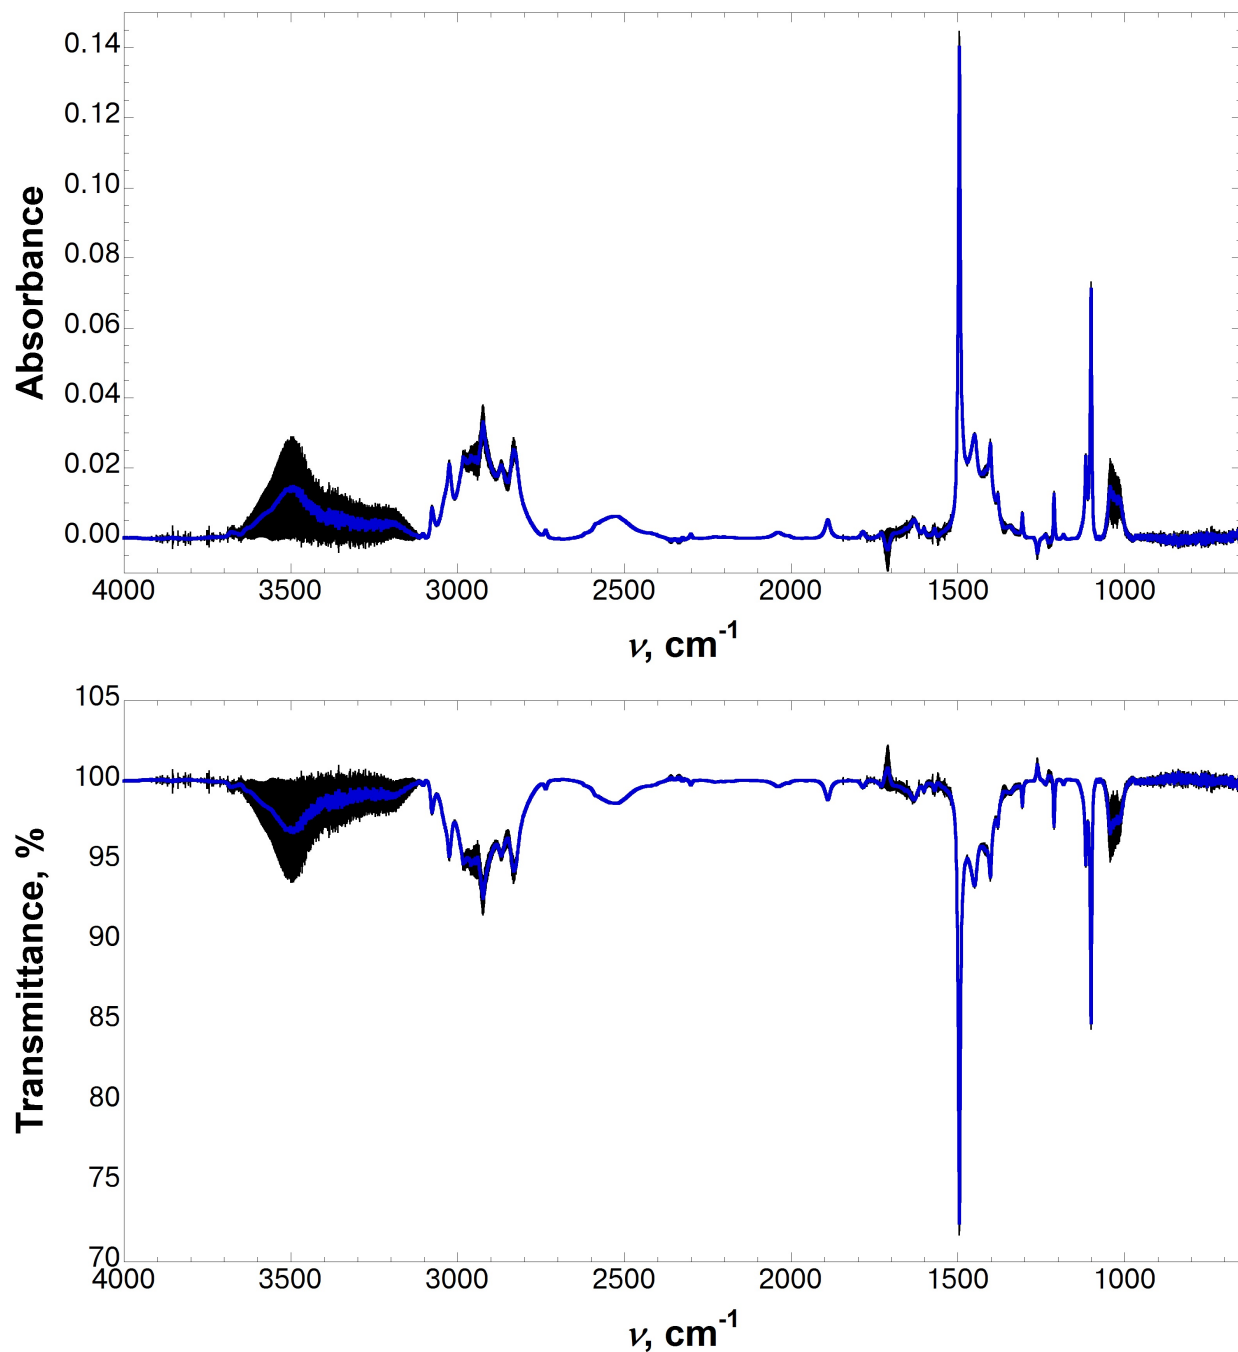

**Figure S26.** FT-IR spectrum of *p*-thiocresol (200 mM) in 25% methanol in  $\text{CCl}_4$ . Three independent spectra were solvent subtracted, baseline corrected, and averaged. Error bars indicate standard error. Top: full IR absorbance spectrum; bottom: full IR transmittance spectrum.  $\nu_{\text{max}}$  of the S–H stretching frequency is 2521  $\text{cm}^{-1}$ .

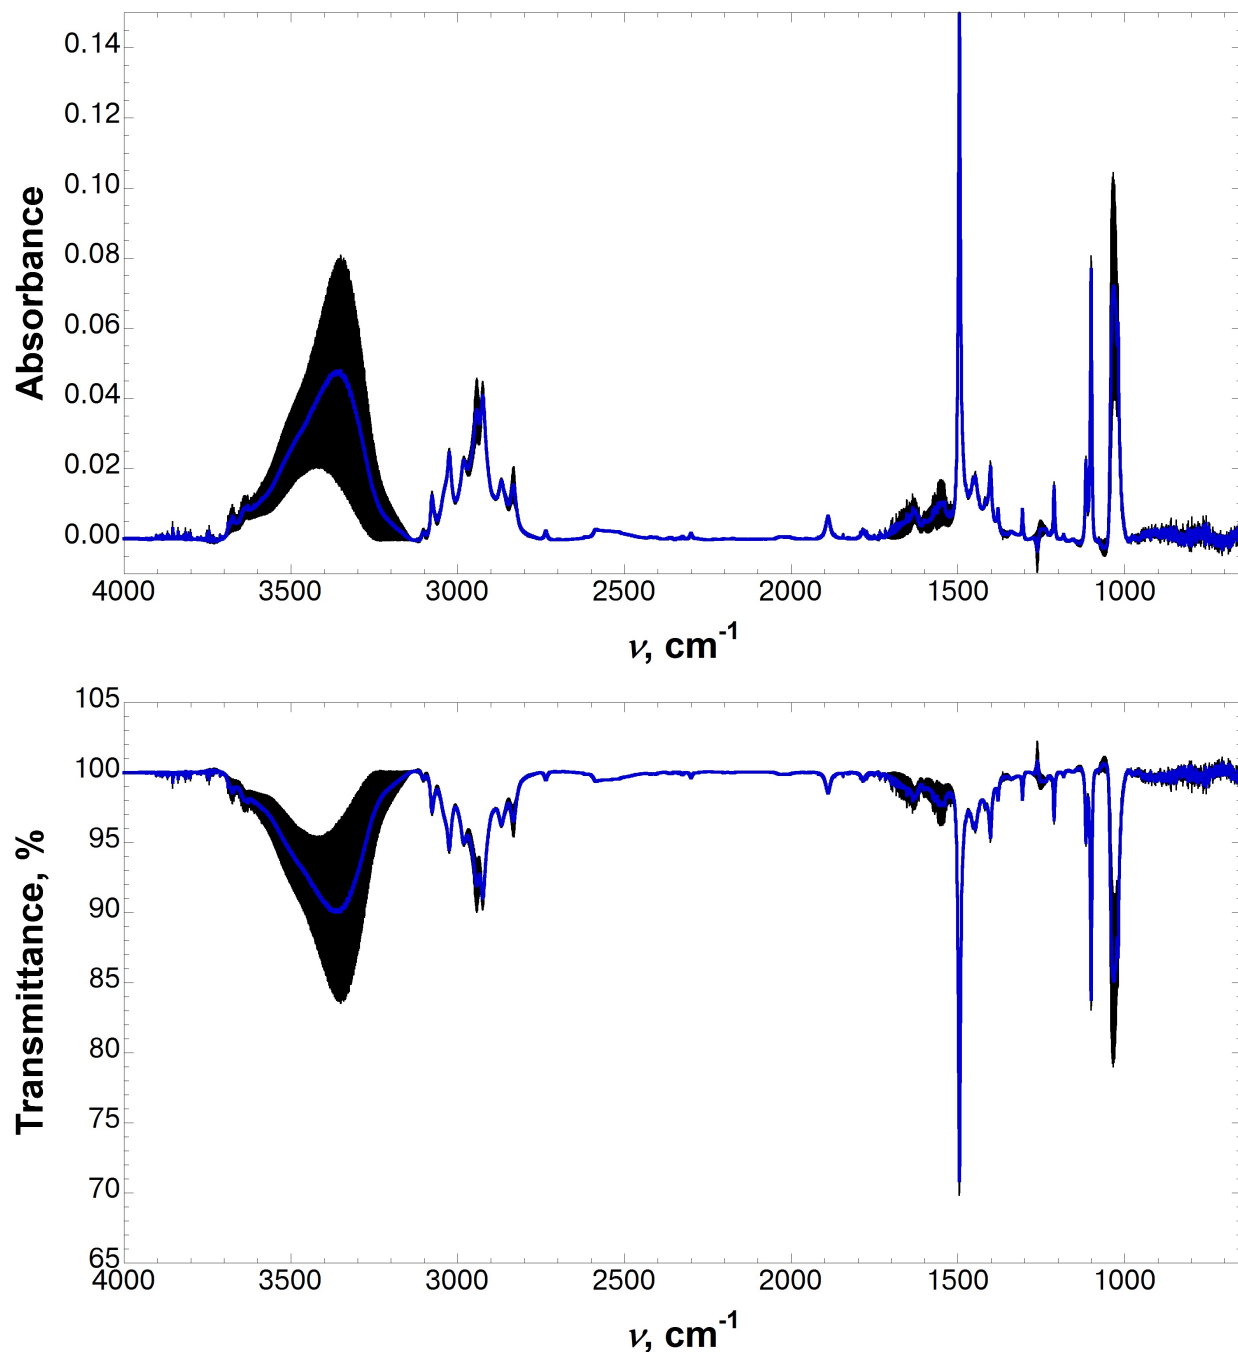

**Figure S27.** FT-IR spectrum of *p*-thiocresol (200 mM) in 10% methanol in  $\text{CCl}_4$ . Three independent spectra were solvent subtracted, baseline corrected, and averaged. Error bars indicate standard error. Top: full IR absorbance spectrum; bottom: full IR transmittance spectrum. Values for  $\nu_{\text{max}}$  which are consistent with the S–H stretching frequency are 2584  $\text{cm}^{-1}$ , 2548  $\text{cm}^{-1}$ , and 2518  $\text{cm}^{-1}$ .



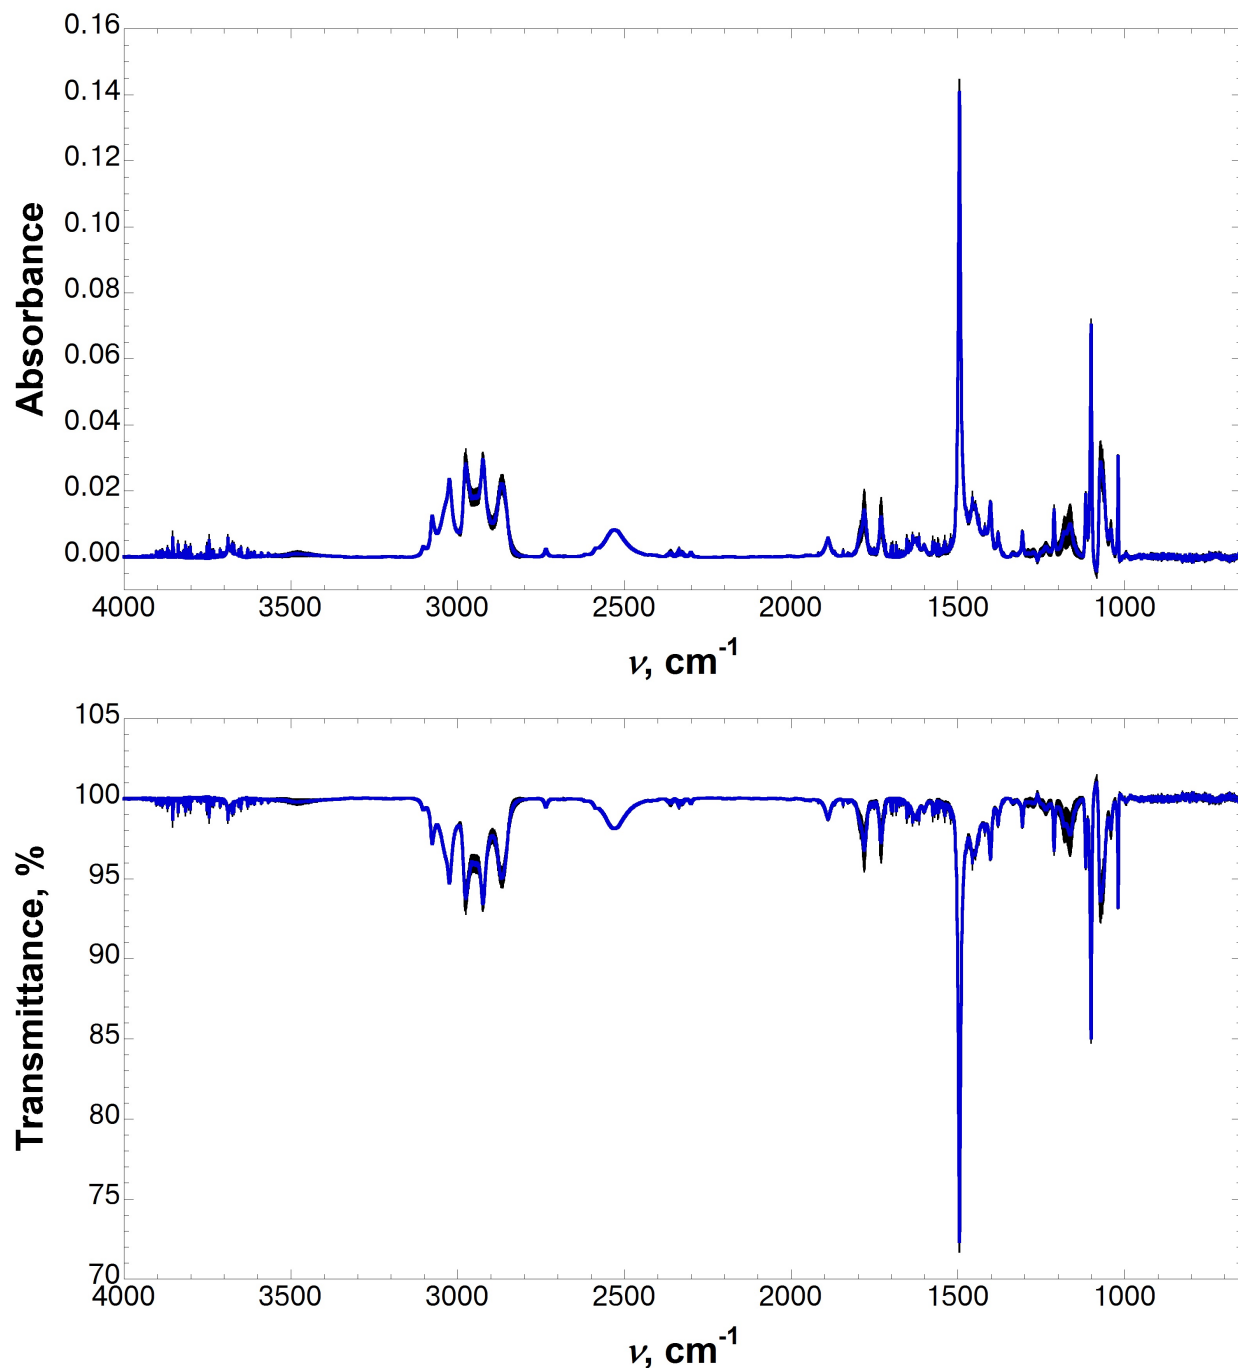

**Figure S28.** FT-IR spectrum of *p*-thiocresol (200 mM) in 25% THF in  $\text{CCl}_4$ . Three independent spectra were solvent subtracted, baseline corrected, and averaged. Error bars indicate standard error. Top: full IR absorbance spectrum; bottom: full IR transmittance spectrum.  $\nu_{\text{max}}$  of the S-H stretching frequency is 2530  $\text{cm}^{-1}$ .

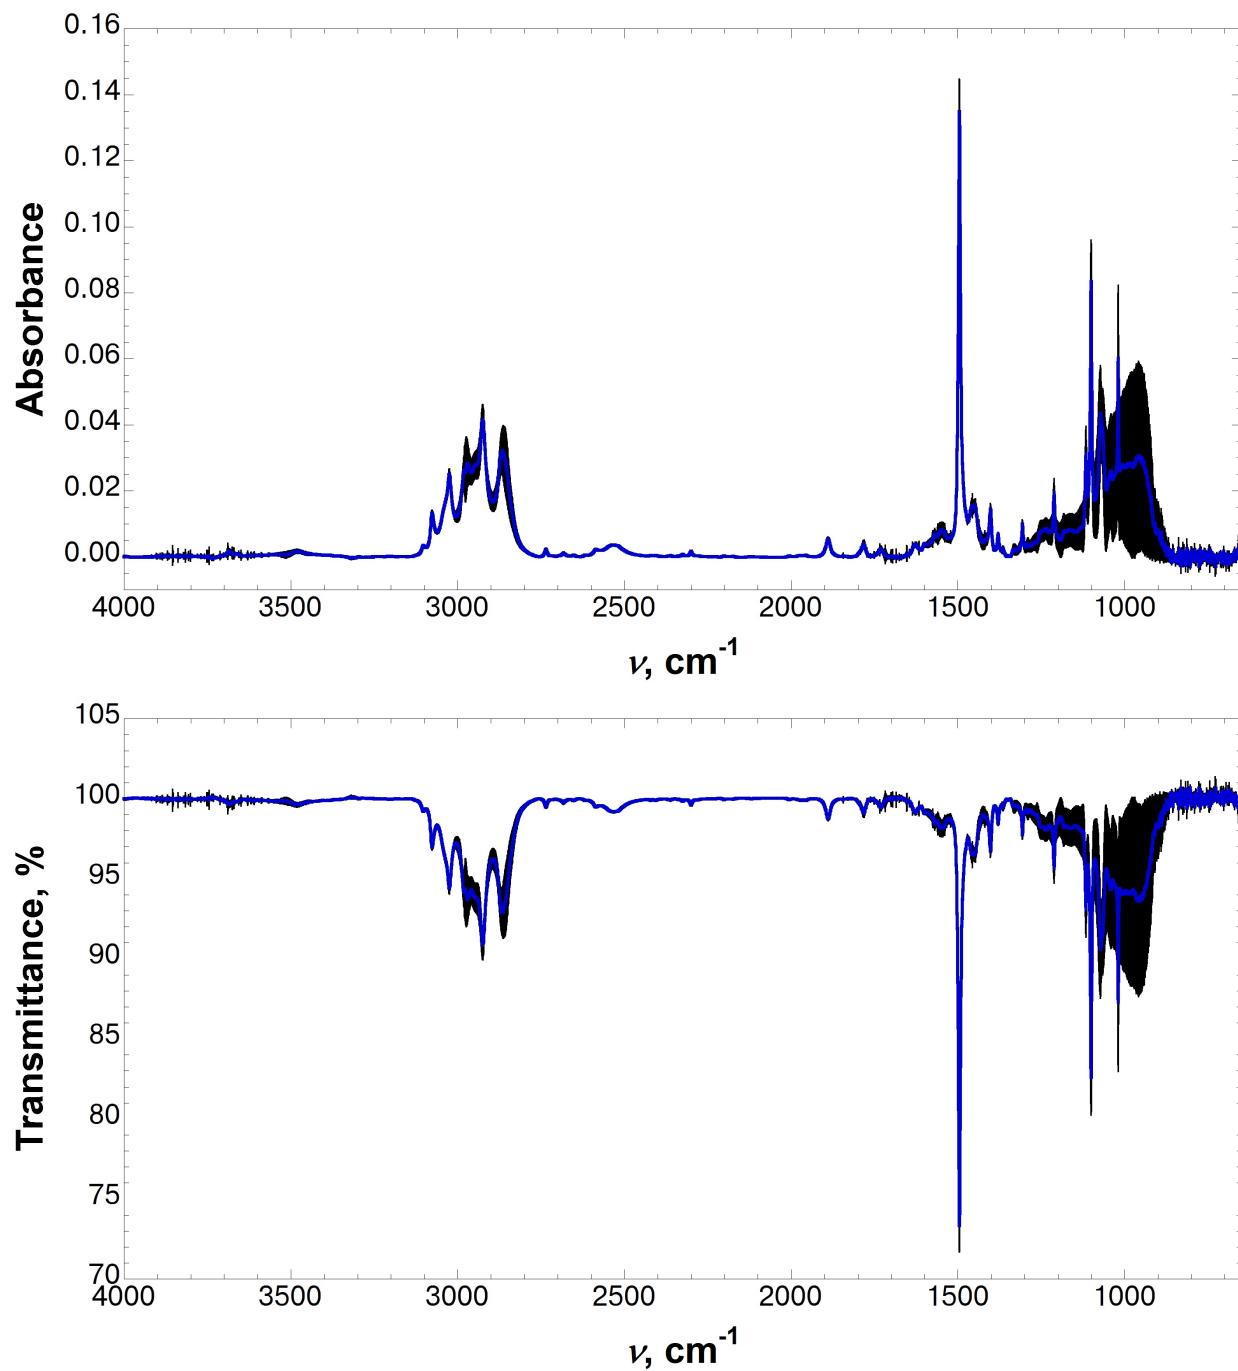

**Figure S29.** FT-IR spectrum of *p*-thiocresol (200 mM) in 10% THF in  $\text{CCl}_4$ . Three independent spectra were solvent subtracted, baseline corrected, and averaged. Error bars indicate standard error. Top: full IR absorbance spectrum; bottom: full IR transmittance spectrum.  $\nu_{\text{max}}$  of the S–H stretching frequency is 2531  $\text{cm}^{-1}$ .

**Comparison of the S–H stretching frequency of *p*-thiocresol in the presence of different aromatic donors**

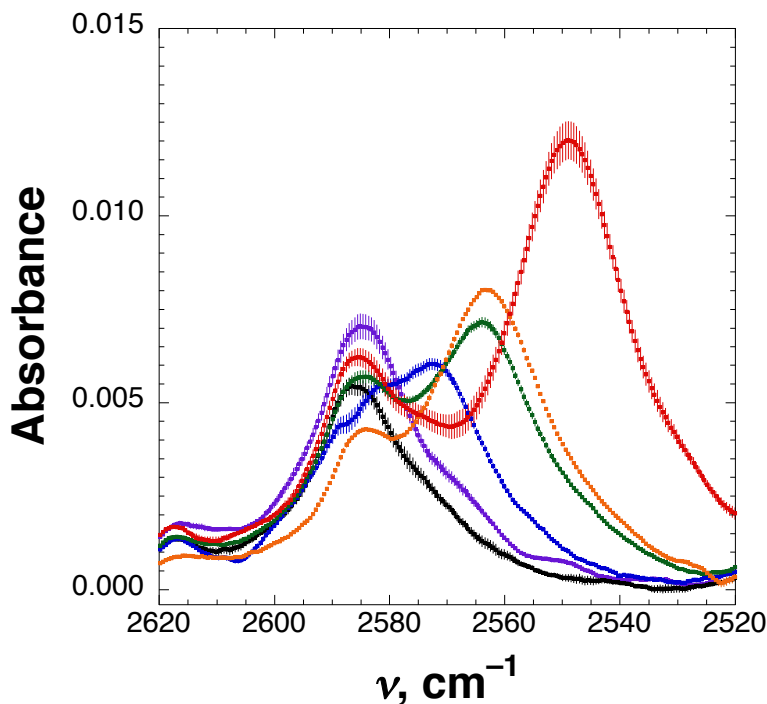

**Figure S30.** Infrared spectroscopy for the S–H stretching of *p*-thiocresol (55 mM) in  $\text{CCl}_4$  in the absence of additional aromatic compounds (black) and in the presence of 800 mM hexamethylbenzene (red), 1-methylindole (orange), mesitylene (green), toluene (blue), *m*-dichlorobenzene (purple). Error bars indicate standard error.

**Table S11.** S–H stretching frequencies of *p*-thiocresol in the presence of added aromatic compounds in  $\text{CCl}_4$ . The changes in S–H stretching frequencies indicate the magnitude of interaction of the aromatic compounds with the thiol hydrogen. More electron-rich aromatic compounds result in larger red shifts in the S–H stretching frequency.

| aromatic additive in $\text{CCl}_4$ | $\nu_{\text{S-H}}, \text{cm}^{-1}$ |                       |
|-------------------------------------|------------------------------------|-----------------------|
|                                     | interacting thiol                  | non-interacting thiol |
| <i>m</i> -Dichlorobenzene           | 2586                               | 2581                  |
| Toluene                             | 2586                               | 2571                  |
| Mesitylene                          | 2586                               | 2563                  |
| 1-Methylindole                      | 2586                               | 2561                  |
| Hexamethylbenzene                   | 2586                               | 2549                  |

**Comparison of the S–H stretching frequency of *p*-thiocresol in the presence of different aromatic donors at low concentrations**

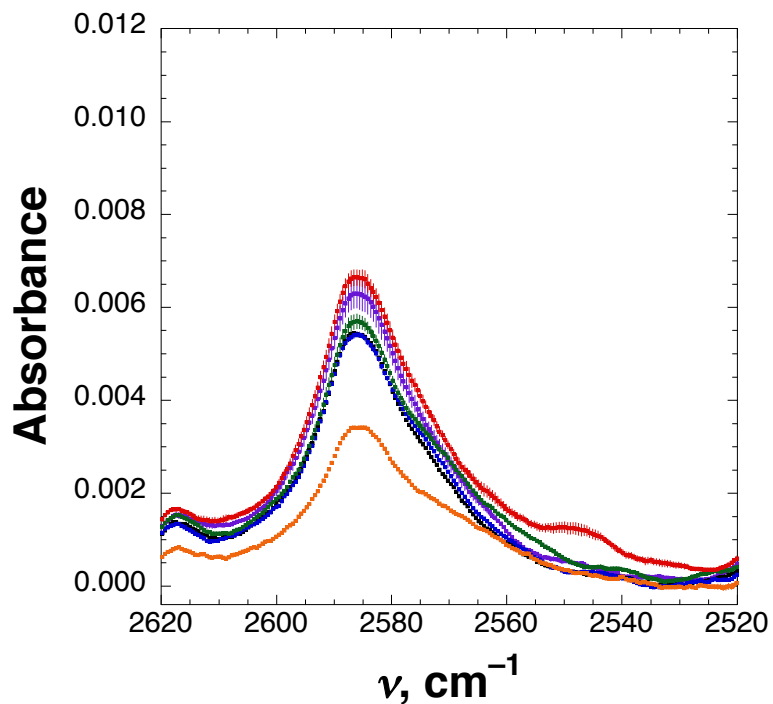

**Figure S31.** Infrared spectroscopy (S–H stretching frequency) of *p*-thiocresol (55 mM) in  $\text{CCl}_4$  in the absence of additional aromatic compound (black) and in the presence of 50 mM hexamethylbenzene (red), 1-methylindole (orange), mesitylene (green), toluene (blue), *m*-dichlorobenzene (purple). Error bars indicate the standard error.

### Self-association of *p*-thiocresol in solution

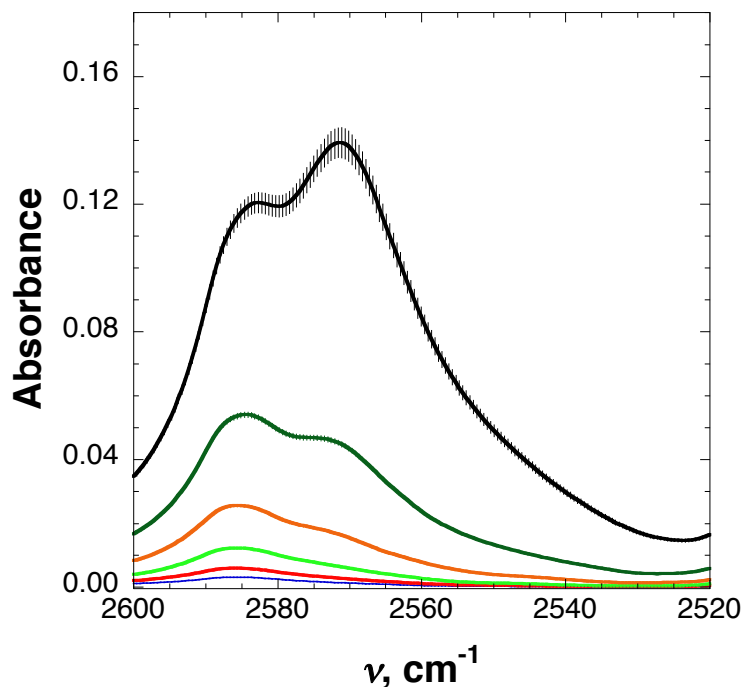

**Figure S32.** Infrared spectroscopy (S–H stretching frequency) of *p*-thiocresol as a function of concentration in  $\text{CCl}_4$ : 34.2 mM (blue), 68.5 mM (red), 137 mM (green), 274 mM (orange) 548 mM (dark green), and 1096 mM (black). With increasing concentration of *p*-thiocresol, the peak at  $2572\text{ cm}^{-1}$  increases in magnitude relative to that of the non-interacting peak ( $2586\text{ cm}^{-1}$ ). The peak or shoulder at  $2572\text{ cm}^{-1}$  is attributed to  $\nu_{\text{S-H}}$  of self-associated of *p*-thiocresol, either via an S–H/ $\pi$  interaction or hydrogen bonding.

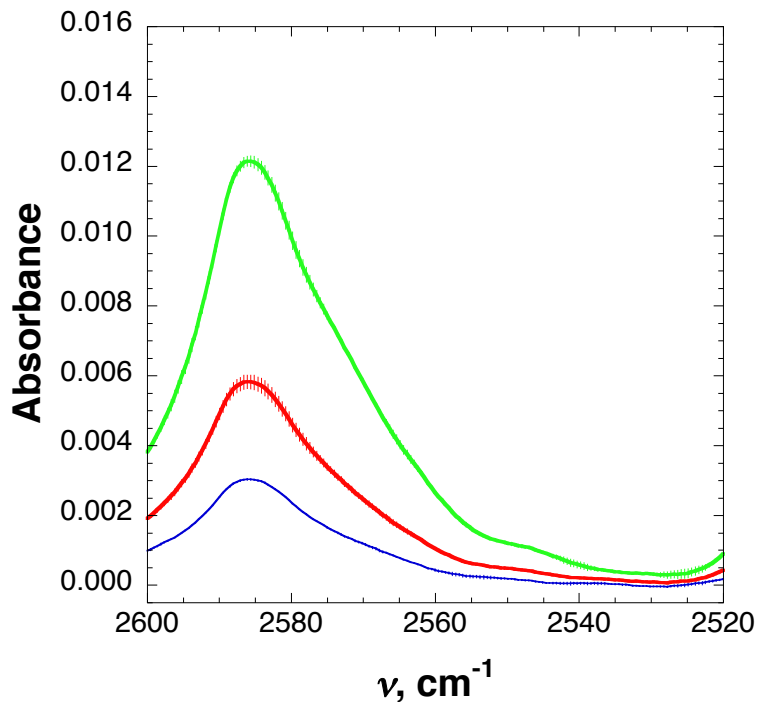

**Figure S33.** Infrared spectroscopy (S–H stretching frequency) of *p*-thiocresol at lower concentrations: 34.2 mM (blue), 68.5 mM (red), and 137 mM (green). Note that with increasing concentration of *p*-thiocresol, the shoulder at 2572 cm<sup>-1</sup> contributes significantly to the intensity of the non-interacting peak (2586 cm<sup>-1</sup>).

The normalized area of  $\nu_{\text{S-H}}$  at 2571 cm<sup>-1</sup> due to self-association of *p*-thiocresol follows a 1:1 binding equation:

$$Y = (Y_{\text{max}} - Y_0) \left[ 1 + \left\{ \frac{-1 + \sqrt{8L + 1}}{4L} \right\} \right]$$

[Equation S1]

where  $L = K_{\text{self}} \times [\text{SH}_{\text{total}}]$ ,  $[\text{SH}]_{\text{total}}$  = total concentration of *p*-thiocresol.

$Y_0$  and  $Y_{\text{max}}$  represent the maximum and minimum signal (area under the curve divided by the concentration of *p*-thiocresol) at 2572 cm<sup>-1</sup>.

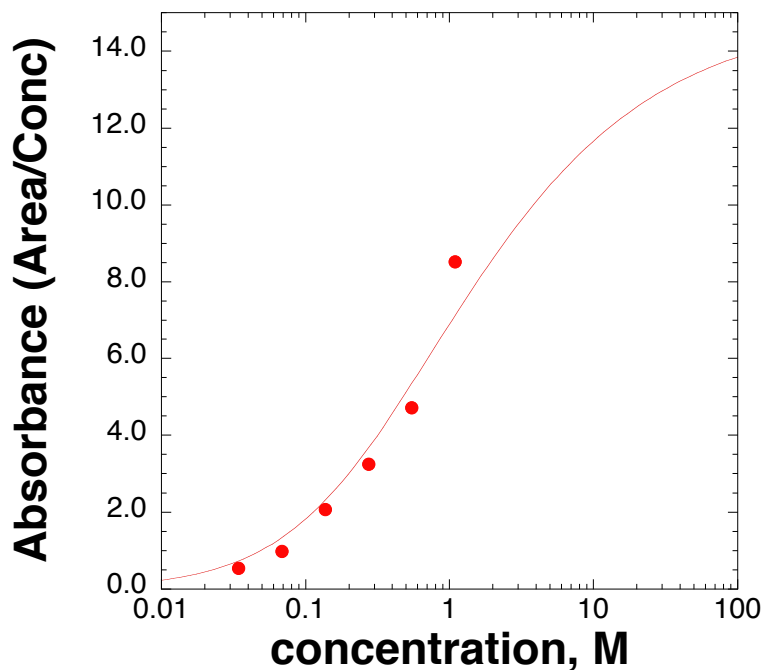

**Figure S34.** Binding curve for the self-association of *p*-thiocresol in solutions in  $\text{CCl}_4$ . The y-axis represents the area under the curve divided by the *p*-thiocresol concentration for the peak at  $2572\text{ cm}^{-1}$ .

The fit of the binding curve (from equation S1) indicates  $K_d = 786 (\pm 123)$  mM for self-association of *p*-thiocresol. These data do not indicate whether the “interacting” frequency is due to an S–H/ $\pi$  interaction or a conventional hydrogen bond. These data are consistent with a free thiol (non-interacting frequency,  $2586\text{ cm}^{-1}$ ) and thiol dimer (termed “interacting” frequency,  $2572\text{ cm}^{-1}$ ).

## Titration of *p*-thiocresol with different aromatic donors

Five aromatic compounds (hexamethylbenzene, 1-methylindole, mesitylene, toluene, and *m*-dichlorobenzene) were selected for titration with *p*-thiocresol, based on differing  $\pi$ -electron donation capabilities. All of the selected aromatic compounds (except for 1-methylindole) have a benzene ring as the donor  $\pi$  system. The extent of  $\pi$  electron donation could be controlled via variable substitution on the aromatic ring. Hexamethylbenzene, with six electron-donating methyl groups, was expected to have highest electron donation, followed by mesitylene and toluene. The *m*-dichlorobenzene was expected to be the weakest donor, with two electron-withdrawing chlorine atoms directly attached to the aromatic  $\pi$  system. 1-Methylindole and toluene were used as model compounds representing the electronic properties of tryptophan and phenylalanine respectively, which are relevant to S–H/ $\pi$  interactions involving aromatic donors in biological systems. 1-Methylindole was used in place of the direct tryptophan analogue, 3-methylindole, in order to avoid compounding effects of N–H/ $\pi$  interaction via the hydrogen-bond donor capabilities of the indole NH.

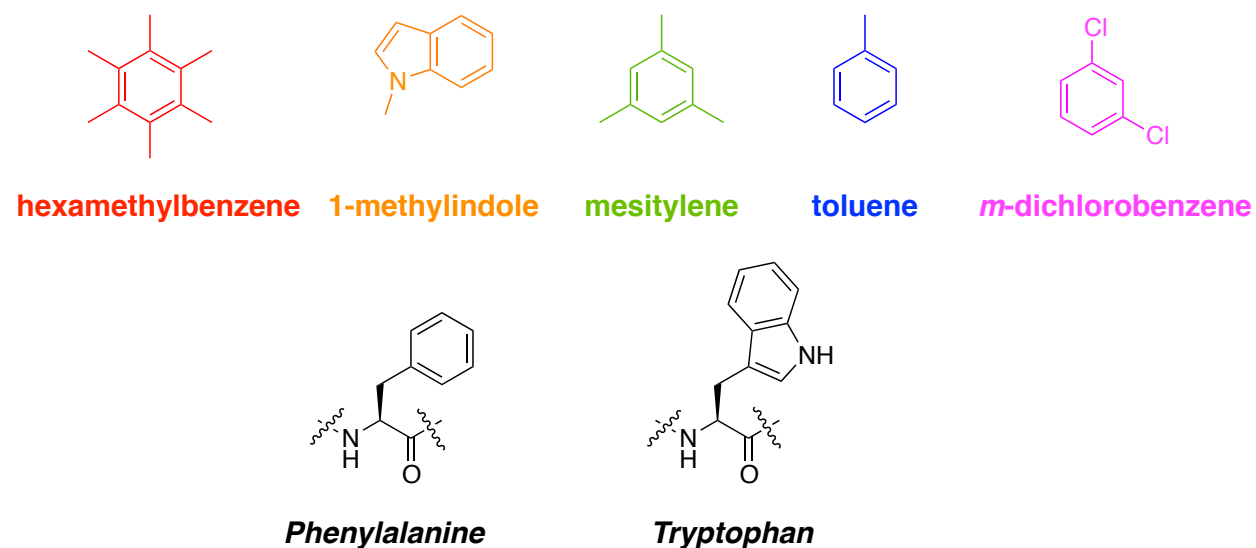

**Figure S35.** Comparison of aromatic compounds used to investigate the strength of the S–H/ $\pi$  interaction as a function of  $\pi$ -electron donating capabilities. Toluene and 1-methylindole were used as model compounds representing the electronic properties of phenylalanine and tryptophan, respectively.

### Concentration-dependent IR spectroscopy

The nature of S–H/ $\pi$  interaction was examined using 55 mM *p*-thiocresol in  $\text{CCl}_4$  via titration with five aromatic compounds: hexamethylbenzene, 1-methylindole, mesitylene, toluene, and *m*-dichlorobenzene. All IR spectra were collected in a Nicolet Magna-IR 750 FT-IR spectrometer equipped with a liquid nitrogen-cooled MCT/A detector at a spectral resolution of  $1\text{ cm}^{-1}$ . The samples were filled in a gas-tight liquid IR cell fitted with quartz windows. All IR spectra (512 or 1024 scans) were individually background corrected and were baseline corrected using the OMNIC FT-IR Software (Nicolet). Each titration was averaged over at least three independent trials.



## Titration of *p*-thiocresol with hexamethylbenzene

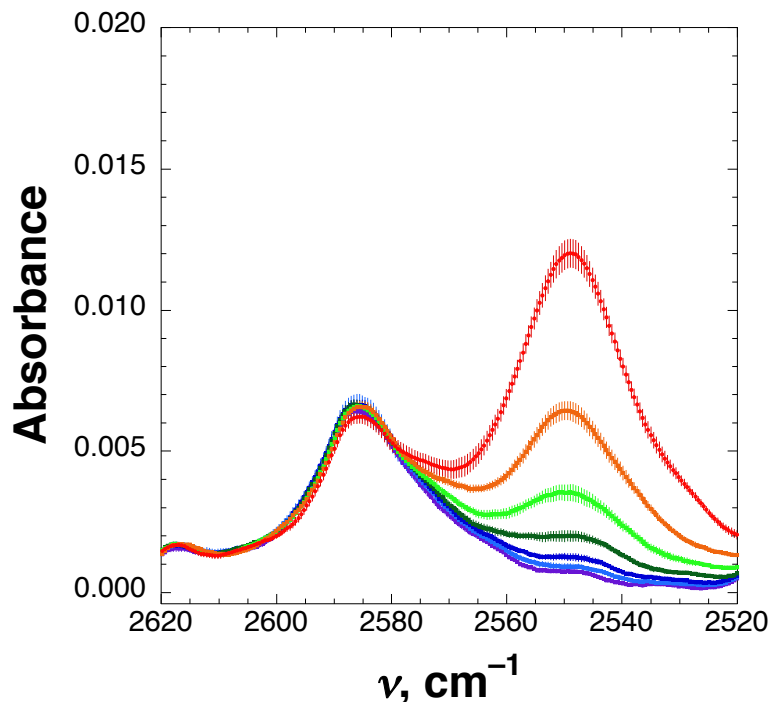

**Figure S36.** Infrared spectroscopy of the S–H stretching frequency of *p*-thiocresol (55 mM) in the presence of different concentrations of hexamethylbenzene in  $\text{CCl}_4$  (12.5 mM (orange), 25 mM (cyan), 50 mM (brick red), 100 mM (green), 200 mM (blue), 400 mM (purple), and 800 mM (red)). The peak at  $2586\text{ cm}^{-1}$  corresponds to the non-interacting S–H stretching frequency of *p*-thiocresol. The peak at  $2549\text{ cm}^{-1}$  corresponds to the S–H stretching frequency for the thiol hydrogen interacting with hexamethylbenzene via an S–H/ $\pi$  interaction. The intensity of the peak at  $2549\text{ cm}^{-1}$  increases with increasing hexamethylbenzene concentration, consistent with increased binding of the aromatic donor to the thiol hydrogen via an S–H/ $\pi$  interaction. The shoulder at  $2572\text{ cm}^{-1}$  is due to the self-association *p*-thiocresol. At concentrations above 800 mM, hexamethylbenzene was observed to precipitate during the experiment. Error bars indicate standard error.

Each of the IR spectra was fit with a three-component Lorentzian distribution function with the general formula

$$Y = Y_0 + \sum_{n=1}^3 \frac{A_n}{(x - x_n)^2 + B_n}$$

where  $Y_0$  is the offset in y-axis,  $A_n$  and  $B_n$  are maximum intensity and width of the distribution around the peak position at  $x_n$ . The  $x_n$  was fixed at  $2549$ ,  $2572$ , and  $2586\text{ cm}^{-1}$  for the interacting peak with the donor (hexamethylbenzene) via S–H/ $\pi$  interaction, self-association of *p*-thiocresol, and for the non-interacting thiol peak, respectively.

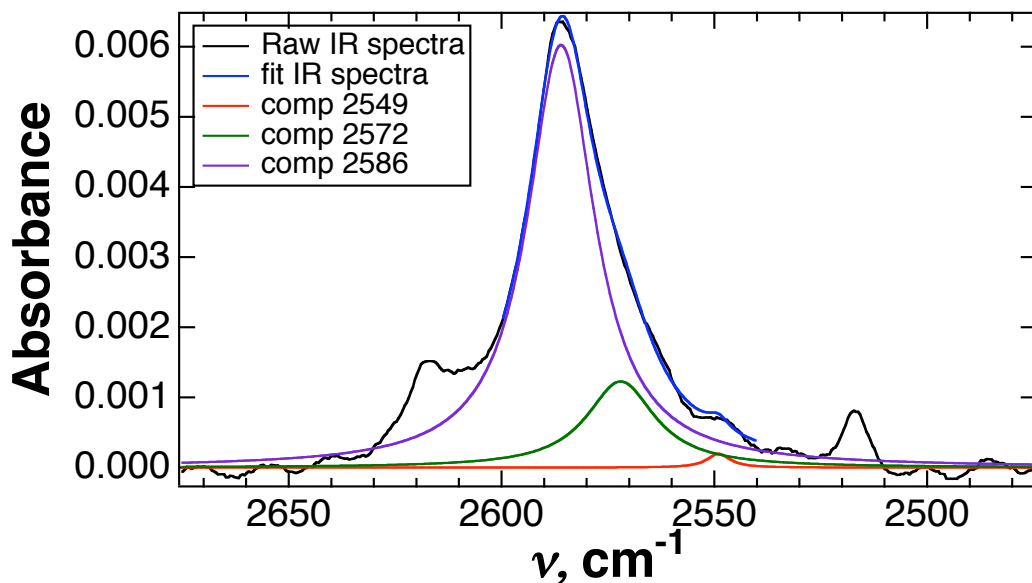

**Figure S37.** Fit and deconvolution of the infrared spectrum for the S–H stretching frequency of *p*-thiocresol in 12.5 mM hexamethylbenzene in CCl<sub>4</sub> (black). The S–H/ $\pi$  interactions are indicated: thiol association with hexamethylbenzene (2549 cm<sup>-1</sup>, red), *p*-thiocresol self-association (2572 cm<sup>-1</sup>, green), and the non-interacting *p*-thiocresol thiol (2586 cm<sup>-1</sup>, purple).

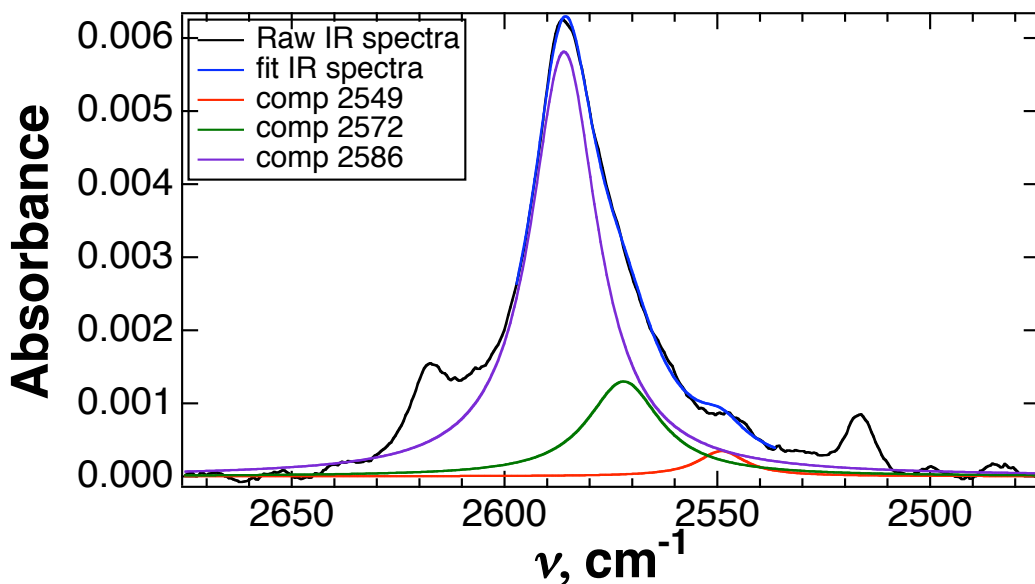

**Figure S38.** Fit and deconvolution of the infrared spectrum for the S–H stretching frequency of *p*-thiocresol in 25 mM hexamethylbenzene in CCl<sub>4</sub> (black). The S–H/ $\pi$  interactions are indicated: thiol association with hexamethylbenzene (2549 cm<sup>-1</sup>, red), *p*-thiocresol self-association (2572 cm<sup>-1</sup>, green), and the non-interacting *p*-thiocresol thiol (2586 cm<sup>-1</sup>, purple).

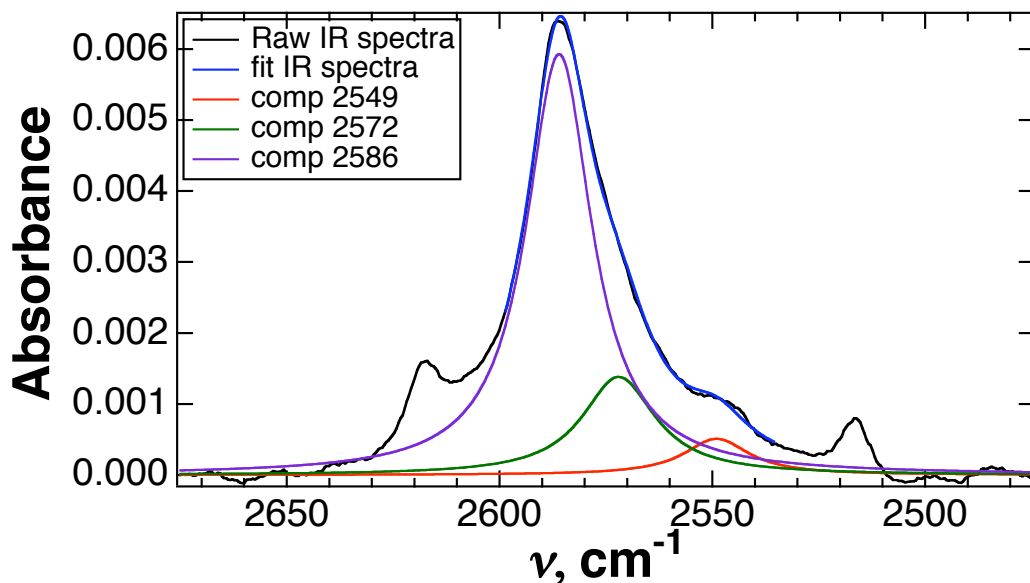

**Figure S39.** Fit and deconvolution of the infrared spectrum for the S–H stretching frequency of *p*-thiocresol in 50 mM hexamethylbenzene in  $\text{CCl}_4$  (black). The S–H/ $\pi$  interactions are indicated: thiol association with hexamethylbenzene (2549  $\text{cm}^{-1}$ , red), *p*-thiocresol self-association (2572  $\text{cm}^{-1}$ , green), and the non-interacting *p*-thiocresol thiol (2586  $\text{cm}^{-1}$ , purple).

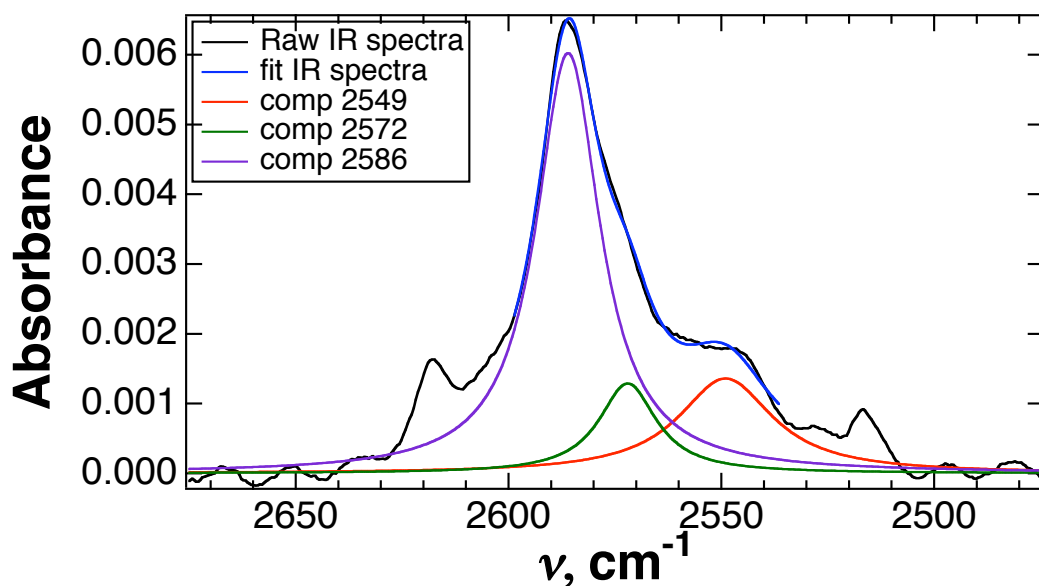

**Figure S40.** Fit and deconvolution of the infrared spectrum for the S–H stretching frequency of *p*-thiocresol in 100 mM hexamethylbenzene in  $\text{CCl}_4$  (black). The S–H/ $\pi$  interactions are indicated: thiol association with hexamethylbenzene (2549  $\text{cm}^{-1}$ , red), *p*-thiocresol self-association (2572  $\text{cm}^{-1}$ , green), and the non-interacting *p*-thiocresol thiol (2586  $\text{cm}^{-1}$ , purple).

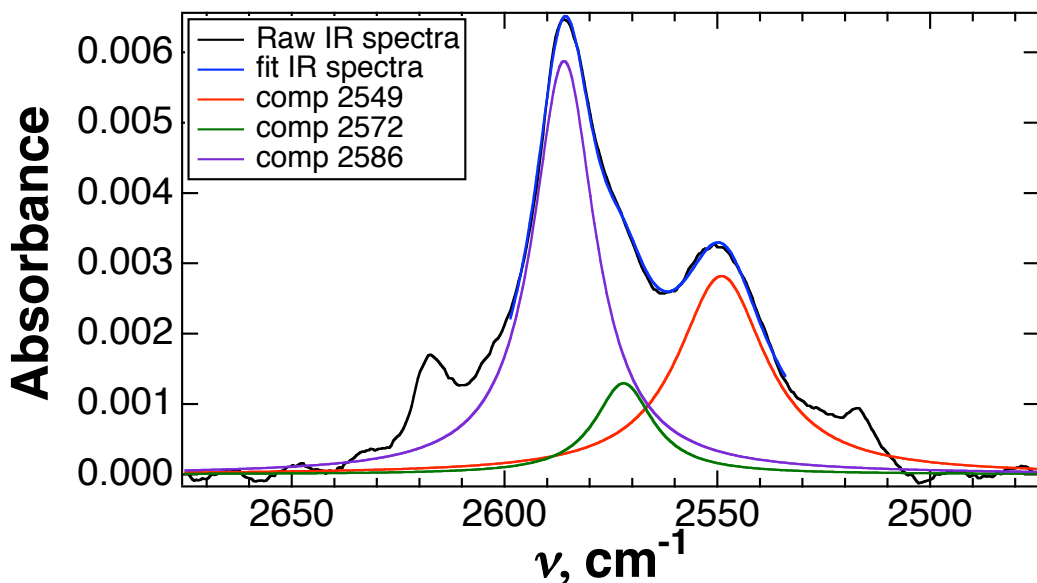

**Figure S41.** Fit and deconvolution of the infrared spectrum for the S–H stretching frequency of *p*-thiocresol in 200 mM hexamethylbenzene in CCl<sub>4</sub> (black). The S–H/ $\pi$  interactions are indicated: thiol association with hexamethylbenzene (2549 cm<sup>-1</sup>, red), *p*-thiocresol self-association (2572 cm<sup>-1</sup>, green), and the non-interacting *p*-thiocresol thiol (2586 cm<sup>-1</sup>, purple).

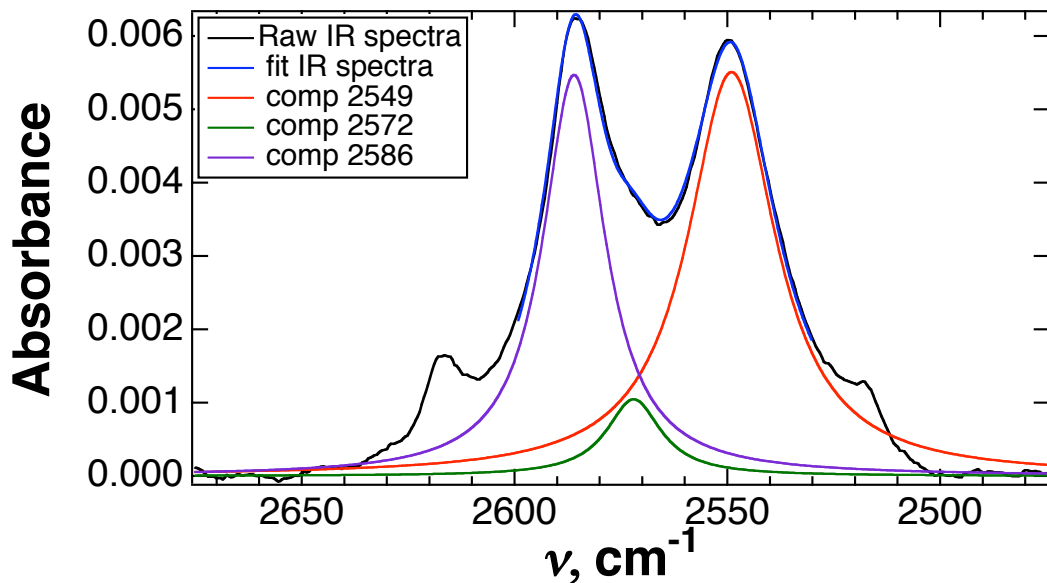

**Figure S42.** Fit and deconvolution of the infrared spectrum for the S–H stretching frequency of *p*-thiocresol in 400 mM hexamethylbenzene in CCl<sub>4</sub> (black). The S–H/ $\pi$  interactions are indicated: thiol association with hexamethylbenzene (2549 cm<sup>-1</sup>, red), *p*-thiocresol self-association (2572 cm<sup>-1</sup>, green), and the non-interacting *p*-thiocresol thiol (2586 cm<sup>-1</sup>, purple).

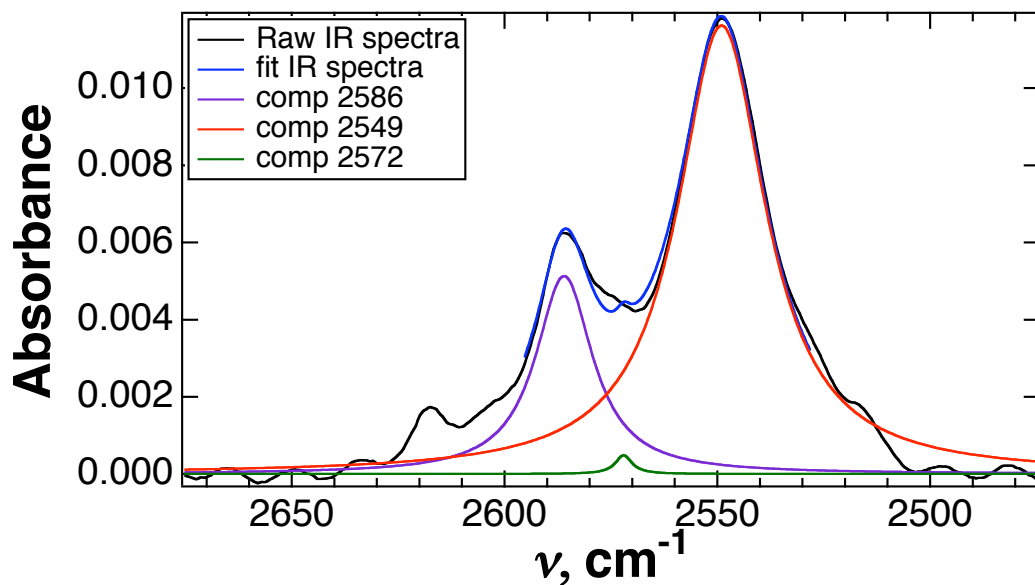

**Figure S43.** Fit and deconvolution of the infrared spectrum for the S–H stretching frequency of *p*-thiocresol in 800 mM hexamethylbenzene in  $\text{CCl}_4$  (black). The S–H/ $\pi$  interactions are indicated: thiol association with hexamethylbenzene (2549  $\text{cm}^{-1}$ , red), *p*-thiocresol self-association (2572  $\text{cm}^{-1}$ , green), and the non-interacting *p*-thiocresol thiol (2586  $\text{cm}^{-1}$ , purple).

## Titration of *p*-thiocresol with mesitylene

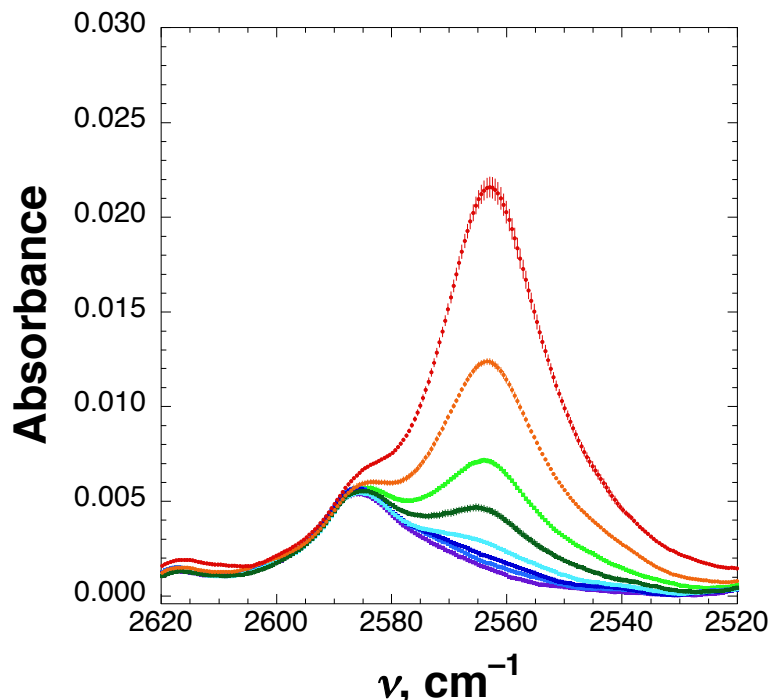

**Figure S44.** Infrared spectroscopy of the S–H stretching frequency of *p*-thiocresol (55 mM) in the presence of different concentrations of mesitylene in CCl<sub>4</sub> (25 mM (purple), 50 mM (light blue), 100 mM (blue), 200 mM (cyan), 400 mM (dark green), 800 mM (green), 1600 mM (orange), and 3200 mM (red)). The peak at 2586 cm<sup>-1</sup> corresponds to the non-interacting S–H stretching frequency of *p*-thiocresol. The peak at 2563 cm<sup>-1</sup> corresponds to the S–H stretching frequency for the thiol hydrogen interacting with mesitylene via an S–H/π interaction. The peak at 2563 cm<sup>-1</sup> increases in intensity with increasing mesitylene concentration, consistent with increased binding of the aromatic donor to the thiol hydrogen of *p*-thiocresol via an S–H/π interaction. The shoulder at 2572 cm<sup>-1</sup> is due to the S–H stretching of *p*-thiocresol self-association. Error bars indicate standard error.

Each of the IR spectra was fit with a three-component Lorentzian distribution function with the general formula

$$Y = Y_0 + \sum_{n=1}^3 \frac{A_n}{(x - x_n)^2 + B_n}$$

where  $Y_0$  is the offset in y-axis and  $A_n$  and  $B_n$  are maximum intensity and width of the distribution around the peak position at  $x_n$ . The  $x_n$  was fixed at 2563, 2572, and 2586 cm<sup>-1</sup> for the interacting peak with the donor (mesitylene), self-association of *p*-thiocresol, and for the non-interacting thiol peak, respectively.

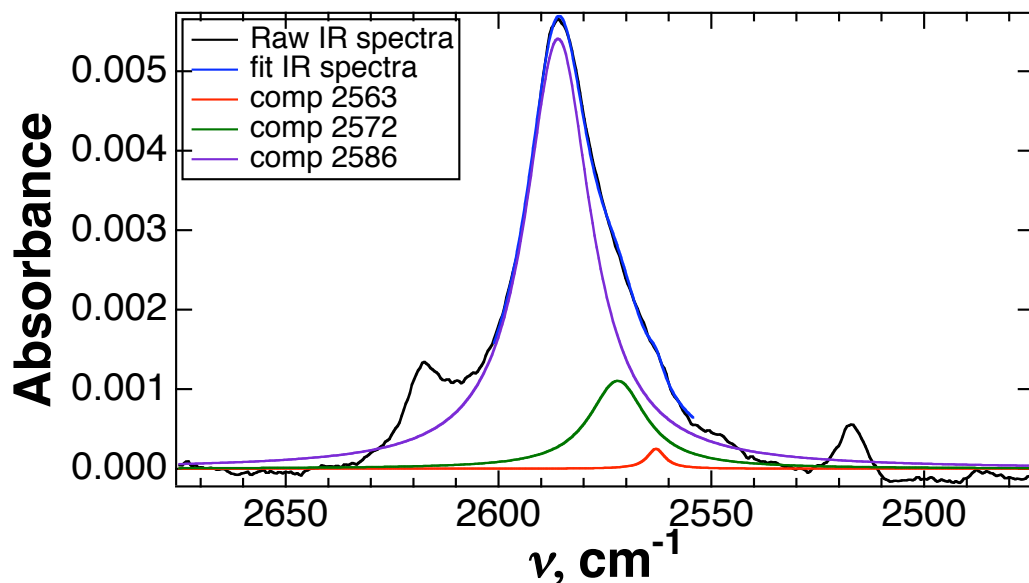

**Figure S45.** Fit and deconvolution of the infrared spectrum for the S–H stretching frequency of *p*-thiocresol in 25 mM mesitylene in CCl<sub>4</sub> (black). The S–H/π interactions are indicated: thiol association with mesitylene (2563 cm<sup>-1</sup>, red), *p*-thiocresol self-association (2572 cm<sup>-1</sup>, green), and the non-interacting *p*-thiocresol thiol (2586 cm<sup>-1</sup>, purple).

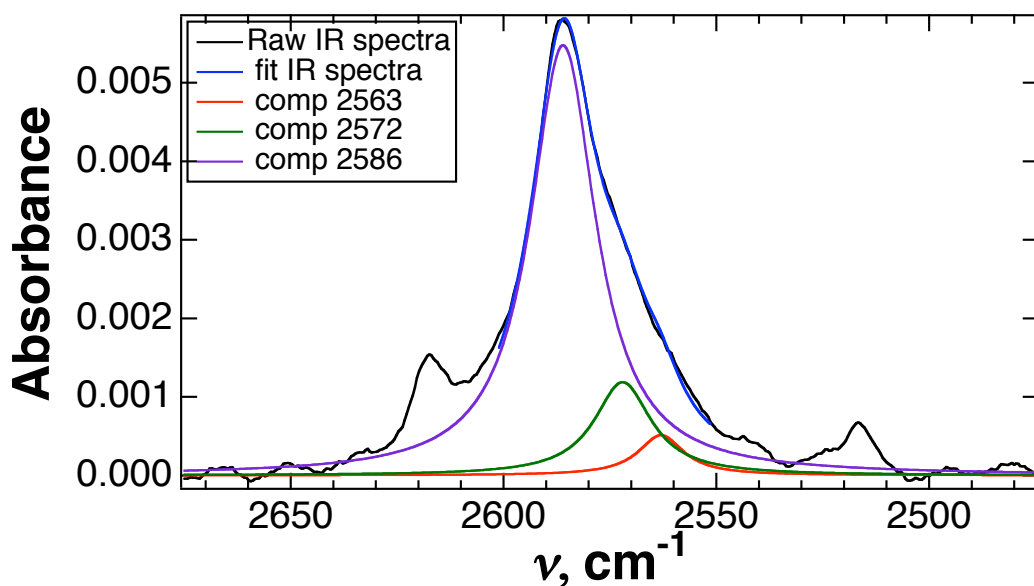

**Figure S46.** Fit and deconvolution of the infrared spectrum for the S–H stretching frequency of *p*-thiocresol in 50 mM mesitylene in CCl<sub>4</sub> (black). The S–H/π interactions are indicated: thiol association with mesitylene (2563 cm<sup>-1</sup>, red), *p*-thiocresol self-association (2572 cm<sup>-1</sup>, green), and the non-interacting *p*-thiocresol thiol (2586 cm<sup>-1</sup>, purple).

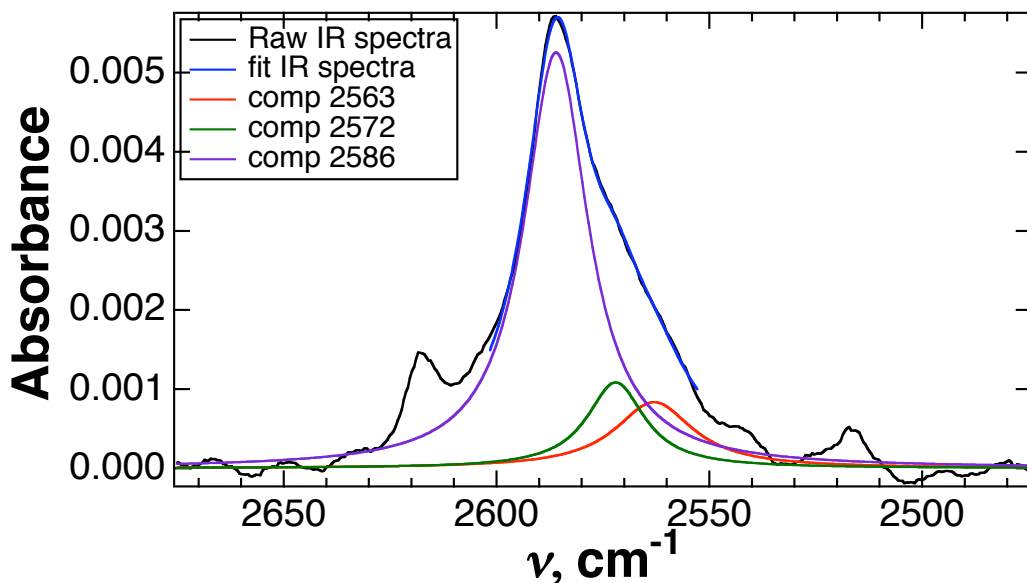

**Figure S47.** Fit and deconvolution of the infrared spectrum for the S–H stretching frequency of *p*-thiocresol in 100 mM mesitylene in CCl<sub>4</sub> (black). The S–H/ $\pi$  interactions are indicated: thiol association with mesitylene (2563 cm<sup>-1</sup>, red), *p*-thiocresol self-association (2572 cm<sup>-1</sup>, green), and the non-interacting *p*-thiocresol thiol (2586 cm<sup>-1</sup>, purple).

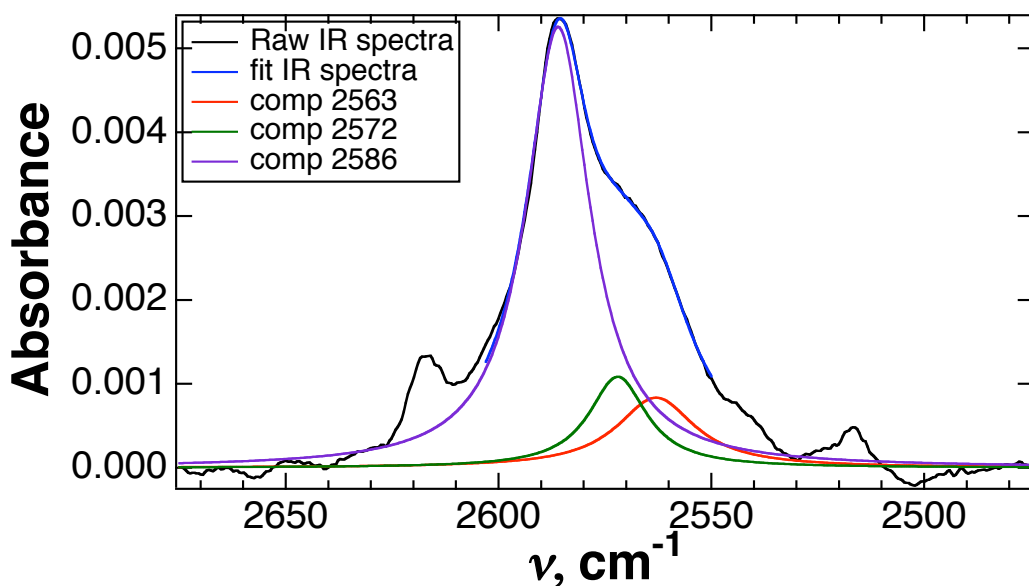

**Figure S48.** Fit and deconvolution of the infrared spectrum for the S–H stretching frequency of *p*-thiocresol in 200 mM mesitylene in CCl<sub>4</sub> (black). The S–H/ $\pi$  interactions are indicated: thiol association with mesitylene (2563 cm<sup>-1</sup>, red), *p*-thiocresol self-association (2572 cm<sup>-1</sup>, green), and the non-interacting *p*-thiocresol thiol (2586 cm<sup>-1</sup>, purple).



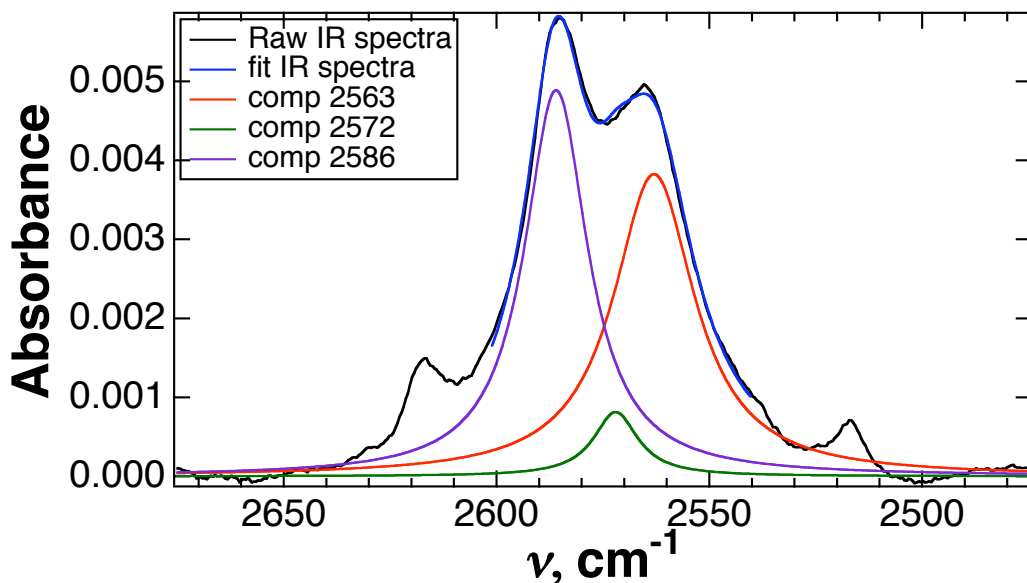

**Figure S49.** Fit and deconvolution of the infrared spectrum for the S–H stretching frequency of *p*-thiocresol in 400 mM mesitylene in CCl<sub>4</sub> (black). The S–H/ $\pi$  interactions are indicated: thiol association with mesitylene (2563 cm<sup>-1</sup>, red), *p*-thiocresol self-association (2572 cm<sup>-1</sup>, green), and the non-interacting *p*-thiocresol thiol (2586 cm<sup>-1</sup>, purple).

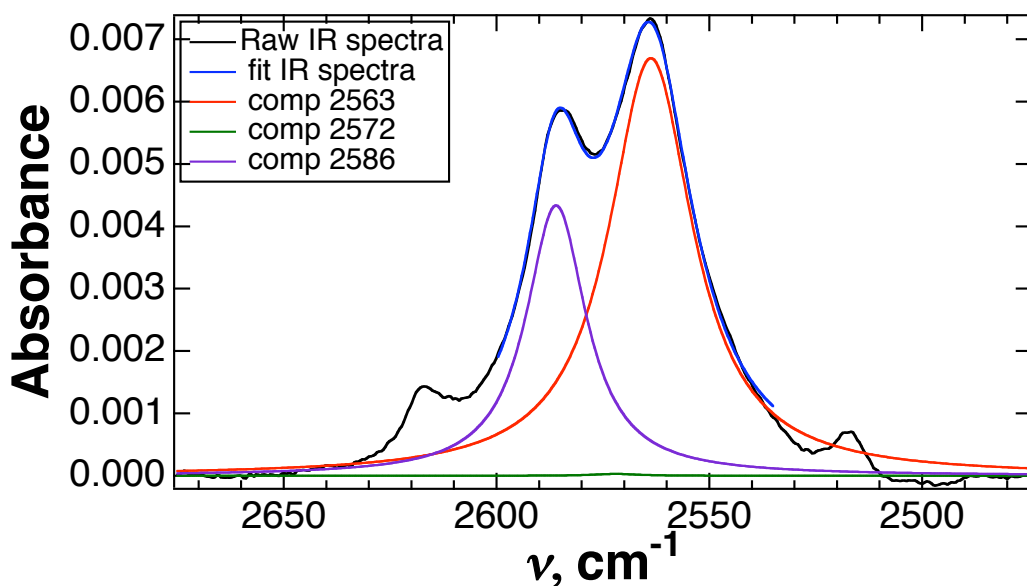

**Figure S50.** Fit and deconvolution of the infrared spectrum for the S–H stretching frequency of *p*-thiocresol in 800 mM mesitylene in CCl<sub>4</sub> (black). The S–H/ $\pi$  interactions are indicated: thiol association with mesitylene (2563 cm<sup>-1</sup>, red), *p*-thiocresol self-association (2572 cm<sup>-1</sup>, green), and the non-interacting *p*-thiocresol thiol (2586 cm<sup>-1</sup>, purple).

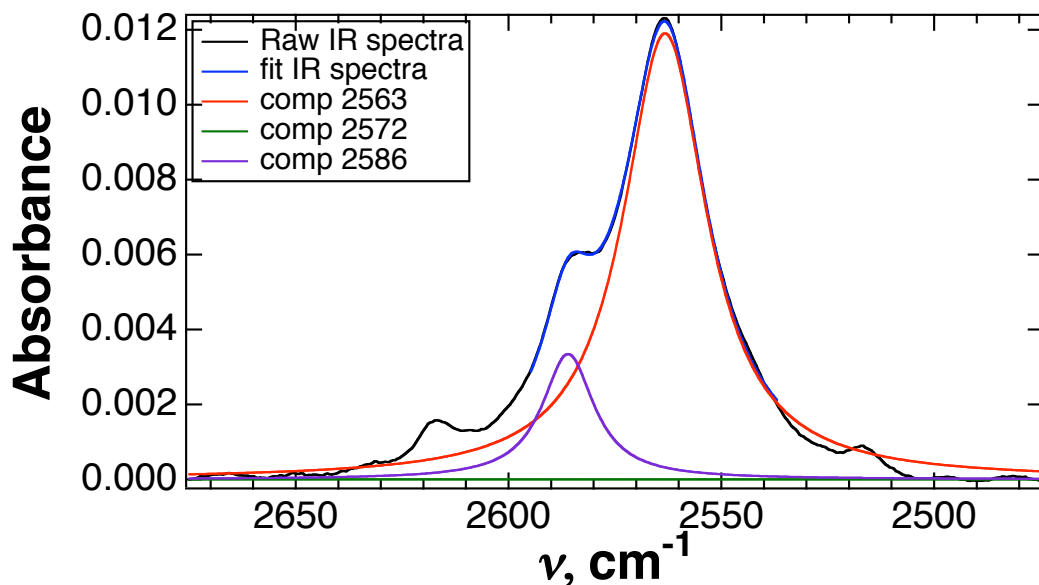

**Figure S51.** Fit and deconvolution of the infrared spectrum for the S–H stretching frequency of *p*-thiocresol in 1600 mM mesitylene in CCl<sub>4</sub> (black). The S–H/ $\pi$  interactions are indicated: thiol association with mesitylene (2563 cm<sup>-1</sup>, red), *p*-thiocresol self-association (2572 cm<sup>-1</sup>, green), and the non-interacting *p*-thiocresol thiol (2586 cm<sup>-1</sup>, purple).

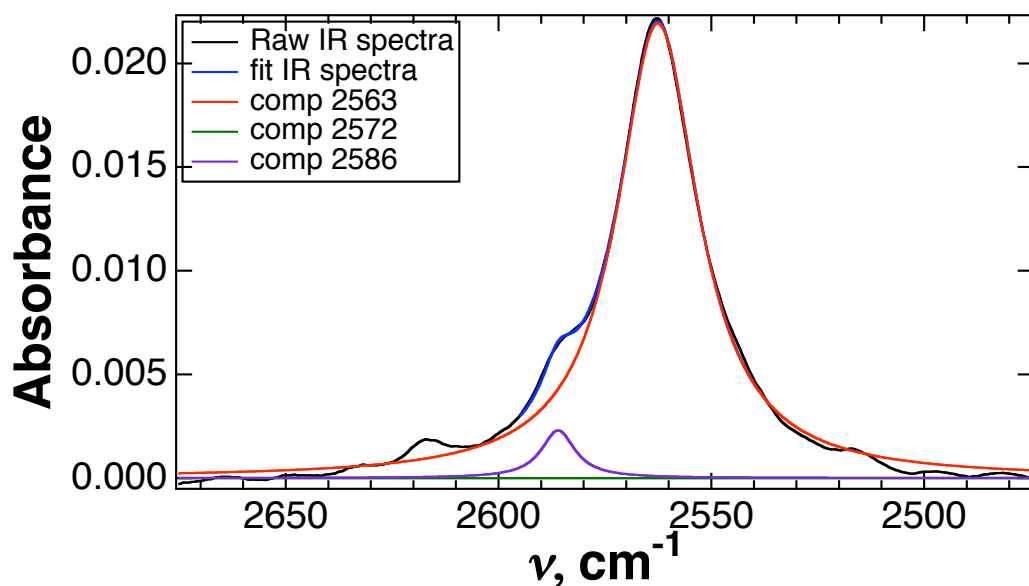

**Figure S52.** Fit and deconvolution of the infrared spectrum for the S–H stretching frequency of *p*-thiocresol in 3200 mM mesitylene in CCl<sub>4</sub> (black). The S–H/ $\pi$  interactions are indicated: thiol association with mesitylene (2563 cm<sup>-1</sup>, red), *p*-thiocresol self-association (2572 cm<sup>-1</sup>, green), and the non-interacting *p*-thiocresol thiol (2586 cm<sup>-1</sup>, purple).

## Titration of *p*-thiocresol with 1-methylindole

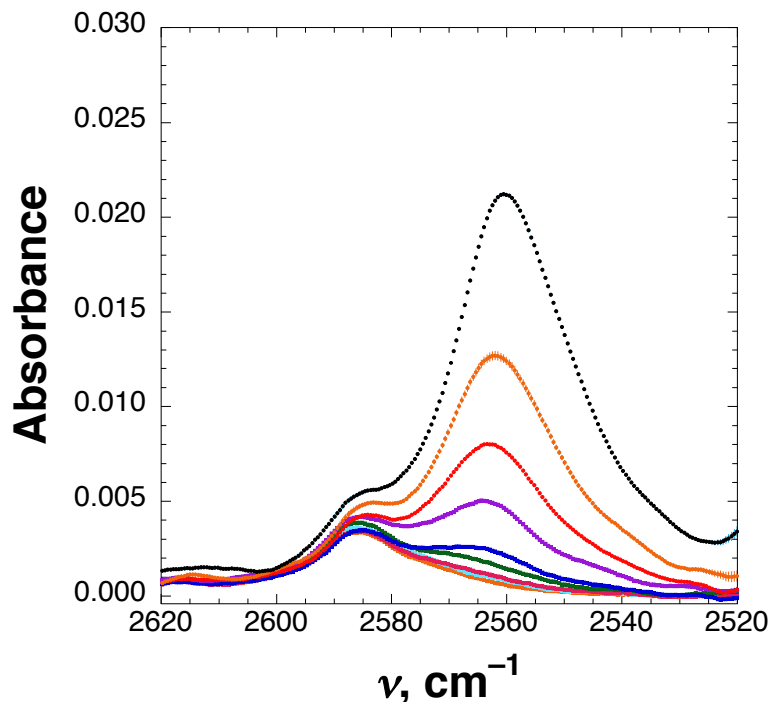

**Figure S53.** Infrared spectroscopy of the S–H stretching frequency of *p*-thiocresol (55 mM) in the presence of different concentrations of 1-methylindole in CCl<sub>4</sub> (12.5 mM (magenta), 25 mM (cyan), 50 mM (red), 100 mM (dark green), 200 mM (blue), 400 mM (purple), 800 mM (green), 1600 mM (orange), and 3200 mM (black)). The peak at 2586 cm<sup>-1</sup> corresponds to the non-interacting S–H stretching frequency of *p*-thiocresol. The peak at 2561 cm<sup>-1</sup> corresponds to the S–H stretching frequency for the thiol hydrogen interacting with 1-methylindole via an S–H/ $\pi$  interaction. The peak at 2561 cm<sup>-1</sup> increases in intensity with increasing 1-methylindole concentration, consistent with increased binding of the aromatic donor to the thiol hydrogen of *p*-thiocresol via an S–H/ $\pi$  interaction. The shoulder at 2572 cm<sup>-1</sup> is due to the S–H stretching of *p*-thiocresol self-association. Error bars indicate standard error.

Each of the IR spectra was fit with a three-component Lorentzian distribution function with the general formula

$$Y = Y_0 + \sum_{n=1}^3 \frac{A_n}{(x - x_n)^2 + B_n}$$

where  $Y_0$  is the offset in y-axis,  $A_n$  and  $B_n$  are maximum intensity and width of the distribution around the peak position at  $x_n$ . The  $x_n$  was fixed at 2561, 2572, and 2586 cm<sup>-1</sup> for the interacting peak with the donor (1-methylindole), for the self-association of *p*-thiocresol, and for the non-interacting thiol peak, respectively.

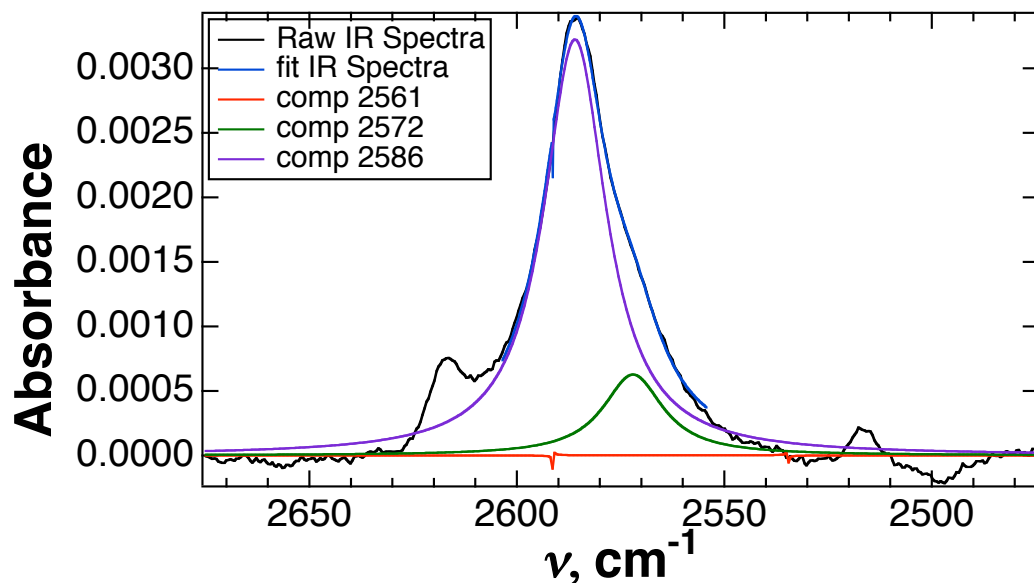

**Figure S54.** Fit and deconvolution of the infrared spectrum for the S–H stretching frequency of *p*-thiocresol in 12.5 mM 1-methylindole in CCl<sub>4</sub> (black). The S–H/ $\pi$  interactions are indicated: thiol association with 1-methylindole (2561 cm<sup>-1</sup>, red), *p*-thiocresol self-association (2572 cm<sup>-1</sup>, green), and the non-interacting *p*-thiocresol thiol (2586 cm<sup>-1</sup>, purple).

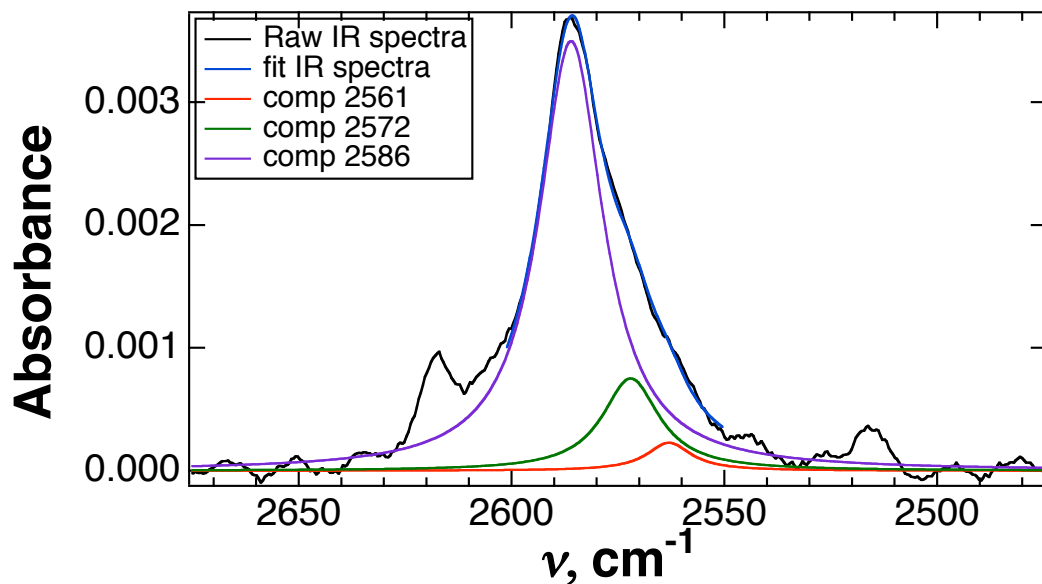

**Figure S55.** Fit and deconvolution of the infrared spectrum for the S–H stretching frequency of *p*-thiocresol in 25 mM 1-methylindole in CCl<sub>4</sub> (black). The S–H/ $\pi$  interactions are indicated: thiol association with 1-methylindole (2561 cm<sup>-1</sup>, red), *p*-thiocresol self-association (2572 cm<sup>-1</sup>, green), and the non-interacting *p*-thiocresol thiol (2586 cm<sup>-1</sup>, purple).

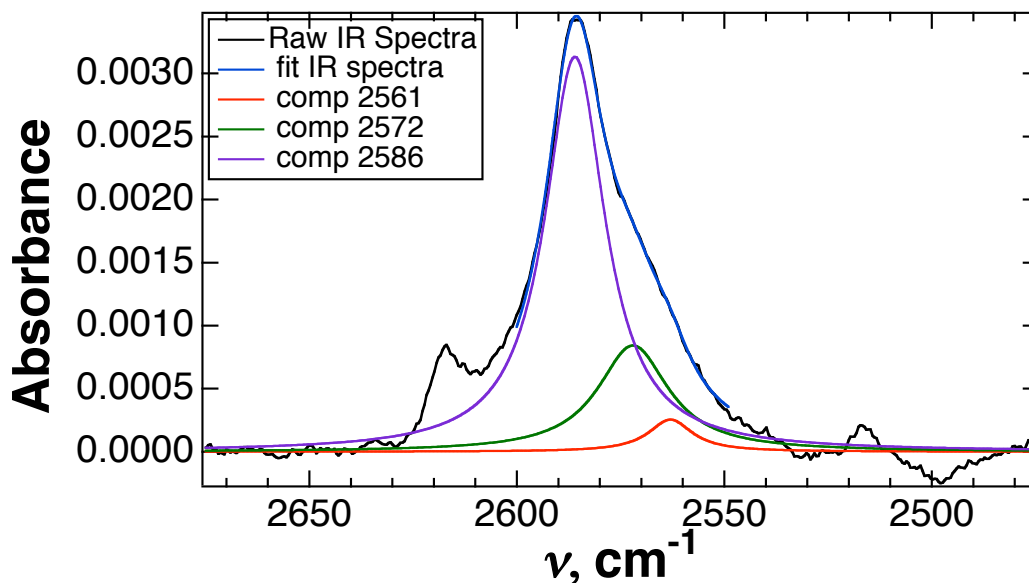

**Figure S56.** Fit and deconvolution of the infrared spectrum for the S–H stretching frequency of *p*-thiocresol in 50 mM 1-methylindole in CCl<sub>4</sub> (black). The S–H/ $\pi$  interactions are indicated: thiol association with 1-methylindole (2561 cm<sup>-1</sup>, red), *p*-thiocresol self-association (2572 cm<sup>-1</sup>, green), and the non-interacting *p*-thiocresol thiol (2586 cm<sup>-1</sup>, purple).

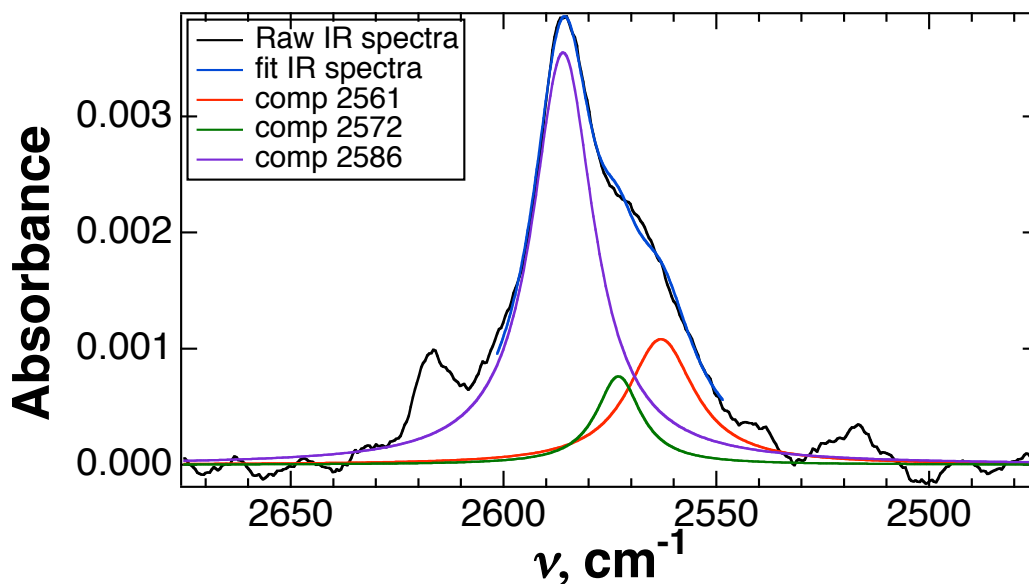

**Figure S57.** Fit and deconvolution of the infrared spectrum for the S–H stretching frequency of *p*-thiocresol in 100 mM 1-methylindole in CCl<sub>4</sub> (black). The S–H/ $\pi$  interactions are indicated: thiol association with 1-methylindole (2561 cm<sup>-1</sup>, red), *p*-thiocresol self-association (2572 cm<sup>-1</sup>, green), and the non-interacting *p*-thiocresol thiol (2586 cm<sup>-1</sup>, purple).

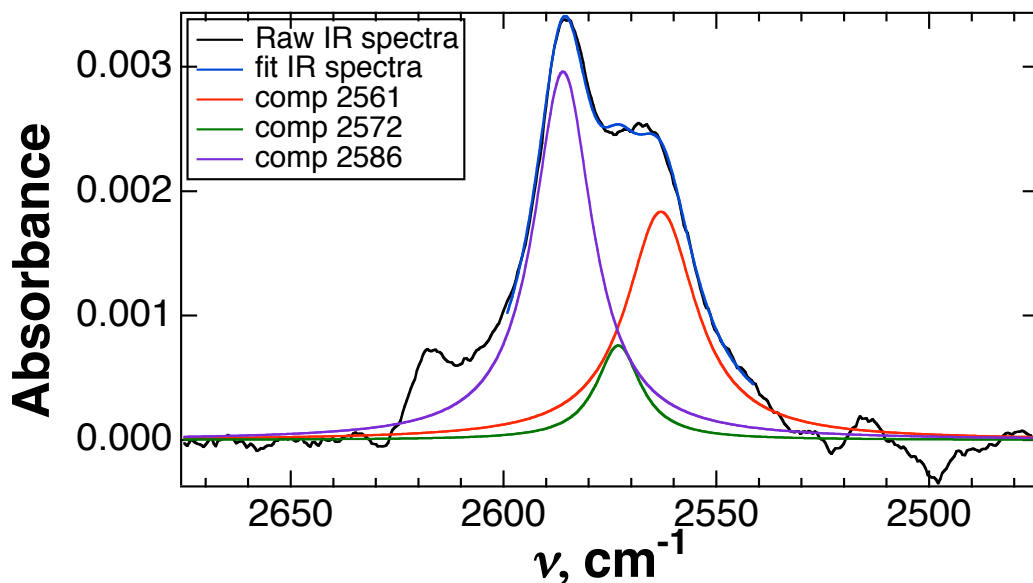

**Figure S58.** Fit and deconvolution of the infrared spectrum for the S–H stretching frequency of *p*-thiocresol in 200 mM 1-methylindole in CCl<sub>4</sub> (black). The S–H/ $\pi$  interactions are indicated: thiol association with 1-methylindole (2561 cm<sup>-1</sup>, red), *p*-thiocresol self-association (2572 cm<sup>-1</sup>, green), and the non-interacting *p*-thiocresol thiol (2586 cm<sup>-1</sup>, purple).

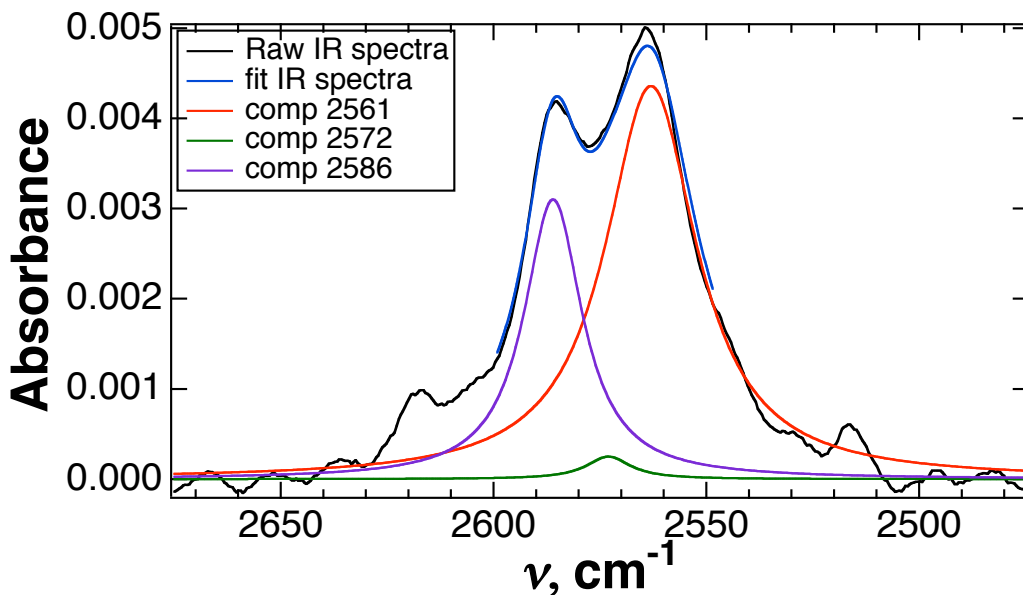

**Figure S59.** Fit and deconvolution of the infrared spectrum for the S–H stretching frequency of *p*-thiocresol in 400 mM 1-methylindole in CCl<sub>4</sub> (black). The S–H/ $\pi$  interactions are indicated: thiol association with 1-methylindole (2561 cm<sup>-1</sup>, red), *p*-thiocresol self-association (2572 cm<sup>-1</sup>, green), and the non-interacting *p*-thiocresol thiol (2586 cm<sup>-1</sup>, purple).

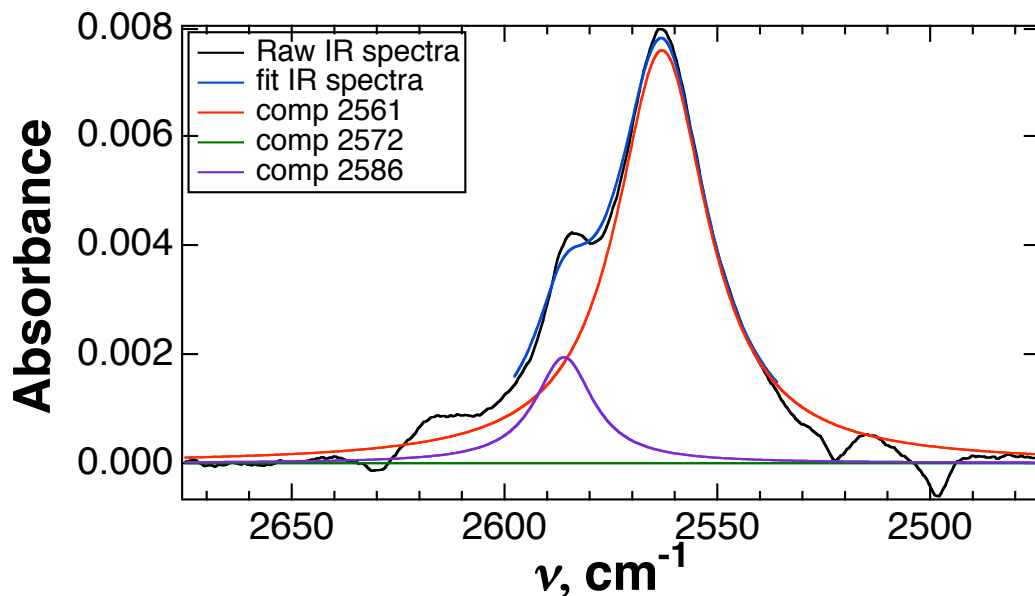

**Figure S60.** Fit and deconvolution of the infrared spectrum for the S–H stretching frequency of *p*-thiocresol in 800 mM 1-methylindole in CCl<sub>4</sub> (black). The S–H/ $\pi$  interactions are indicated: thiol association with 1-methylindole (2561 cm<sup>-1</sup>, red), *p*-thiocresol self-association (2572 cm<sup>-1</sup>, green), and the non-interacting *p*-thiocresol thiol (2586 cm<sup>-1</sup>, purple).

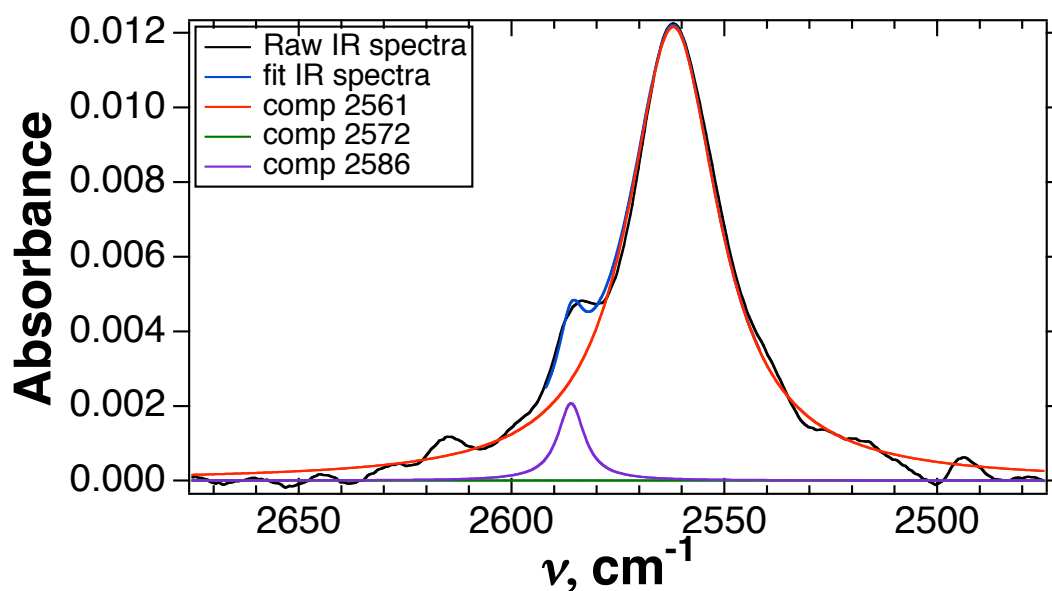

**Figure S61.** Fit and deconvolution of the infrared spectrum for the S–H stretching frequency of *p*-thiocresol in 1600 mM 1-methylindole in CCl<sub>4</sub> (black). The S–H/ $\pi$  interactions are indicated: thiol association with 1-methylindole (2561 cm<sup>-1</sup>, red), *p*-thiocresol self-association (2572 cm<sup>-1</sup>, green), and the non-interacting *p*-thiocresol thiol (2586 cm<sup>-1</sup>, purple).

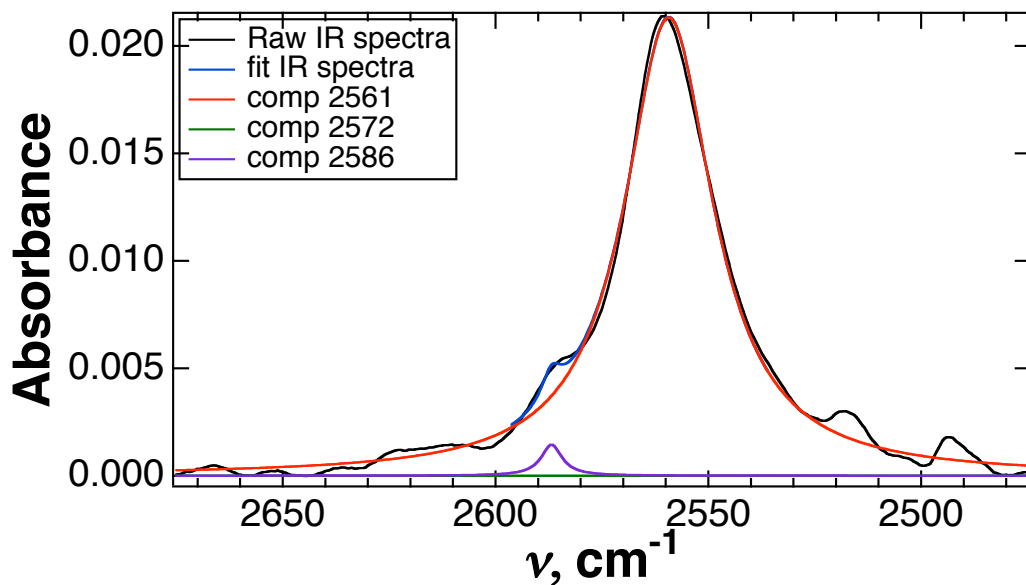

**Figure S62.** Fit and deconvolution of the infrared spectrum for the S–H stretching frequency of *p*-thiocresol in 3200 mM 1-methylindole in  $\text{CCl}_4$  (black). The S–H/ $\pi$  interactions are indicated: thiol association with 1-methylindole (2561  $\text{cm}^{-1}$ , red), *p*-thiocresol self-association (2572  $\text{cm}^{-1}$ , green), and the non-interacting *p*-thiocresol thiol (2586  $\text{cm}^{-1}$ , purple).



### Titration of *p*-thiocresol with toluene

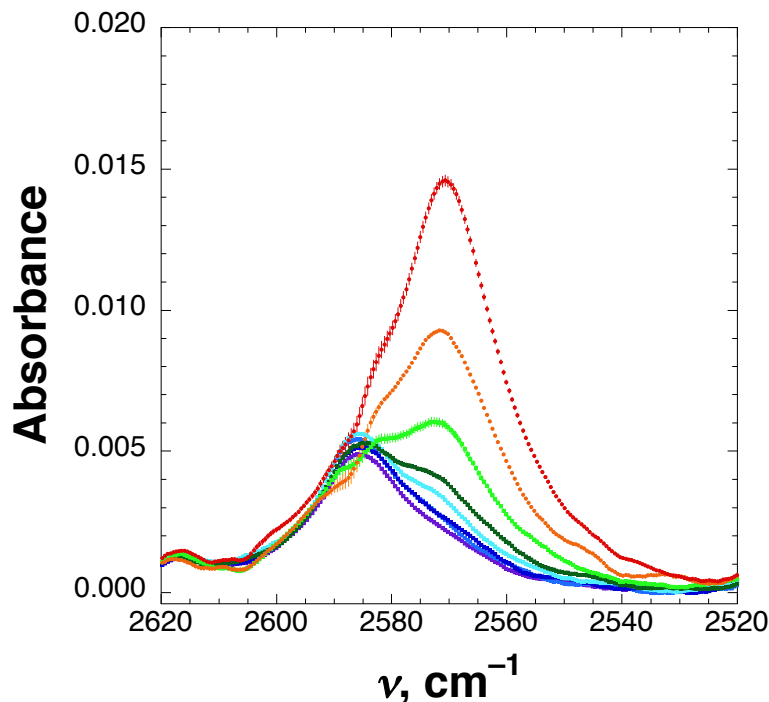

**Figure S63.** Infrared spectroscopy of the S–H stretching frequency of *p*-thiocresol (55 mM) in the presence of different concentrations of toluene in  $\text{CCl}_4$  (25 mM (purple), 50 mM (light blue), 100 mM (blue), 200 mM (cyan), 400 mM (dark green), 800 mM (green), 1600 mM (orange), and 3200 mM (red)). The peak at  $2586\text{ cm}^{-1}$  corresponds to the non-interacting S–H stretching frequency of *p*-thiocresol. The peak at  $2571\text{ cm}^{-1}$  corresponds to the S–H stretching frequency for the thiol hydrogen interacting with toluene via an S–H/ $\pi$  interaction. The peak at  $2571\text{ cm}^{-1}$  increases in intensity with increasing toluene concentration, consistent with increased binding of the aromatic donor to the thiol hydrogen of *p*-thiocresol via an S–H/ $\pi$  interaction. Due to overlap of the S–H stretching frequency of *p*-thiocresol interacting with toluene ( $2571\text{ cm}^{-1}$ ) S–H stretching of *p*-thiocresol due to self-association ( $2572\text{ cm}^{-1}$ ) is not resolved separately. Error bars indicate standard error.

Each of the IR spectra was fit with a two-component Lorentzian distribution function with the general formula

$$Y = Y_0 + \sum_{n=1}^2 \frac{A_n}{(x - x_n)^2 + B_n}$$

where  $Y_0$  is the offset in y-axis and  $A_n$  and  $B_n$  are maximum intensity and width of the distribution around the peak position at  $x_n$ .  $x_n$  was fixed at  $2571$  and  $2586\text{ cm}^{-1}$  for the interacting peak with the donor (toluene), and for the non-interacting thiol peak, respectively.

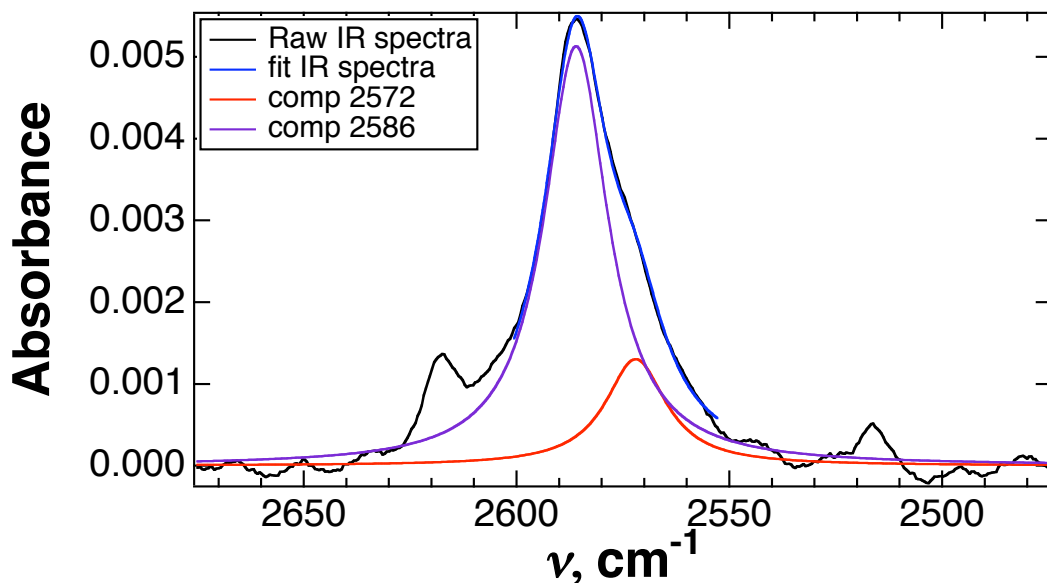

**Figure S64.** Fit and deconvolution of the infrared spectrum for the S–H stretching frequency of *p*-thiocresol in 50 mM toluene in CCl<sub>4</sub> (black). The S–H/ $\pi$  interactions are indicated: thiol association with toluene (2571 cm<sup>-1</sup>, red) and the non-interacting *p*-thiocresol thiol (2586 cm<sup>-1</sup>, purple).

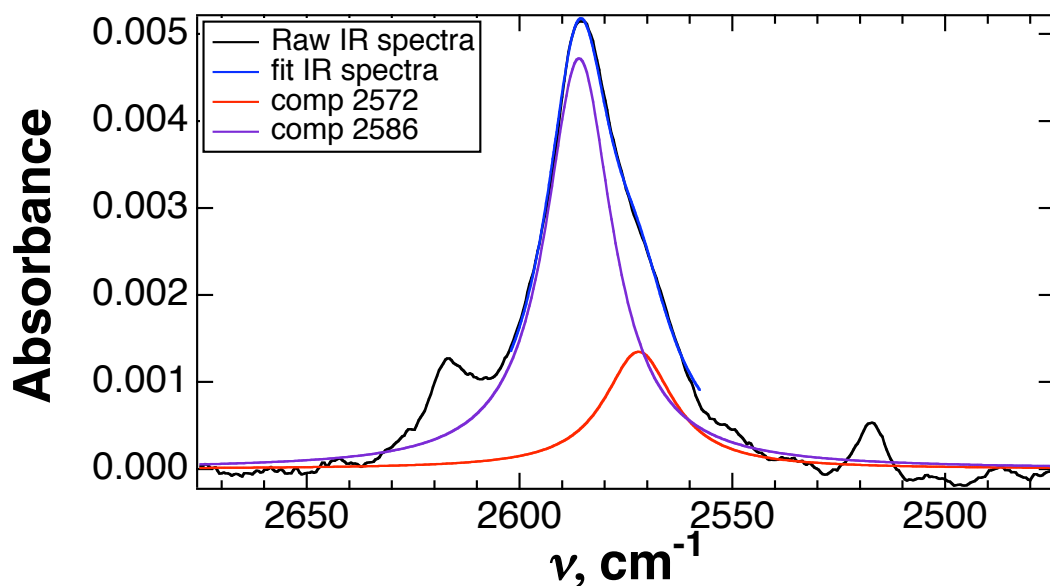

**Figure S65.** Fit and deconvolution of the infrared spectrum for the S–H stretching frequency of *p*-thiocresol in 100 mM toluene in CCl<sub>4</sub> (black). The S–H/ $\pi$  interactions are indicated: thiol association with toluene (2571 cm<sup>-1</sup>, red) and the non-interacting *p*-thiocresol thiol (2586 cm<sup>-1</sup>, purple).

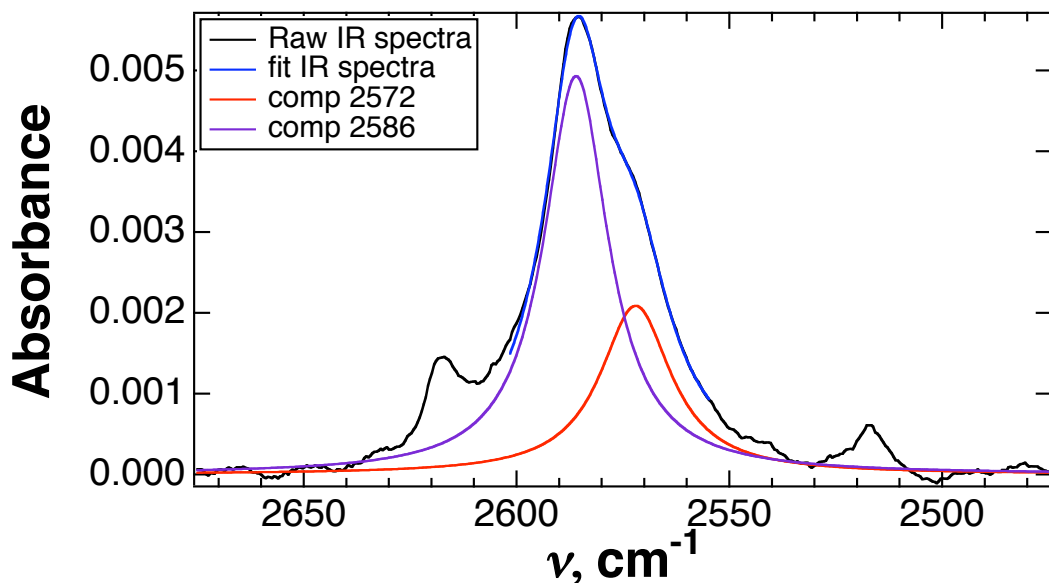

**Figure S66.** Fit and deconvolution of the infrared spectrum for the S–H stretching frequency of *p*-thiocresol in 200 mM toluene in CCl<sub>4</sub> (black). The S–H/ $\pi$  interactions are indicated: thiol association with toluene (2571 cm<sup>-1</sup>, red) and the non-interacting *p*-thiocresol thiol (2586 cm<sup>-1</sup>, purple).

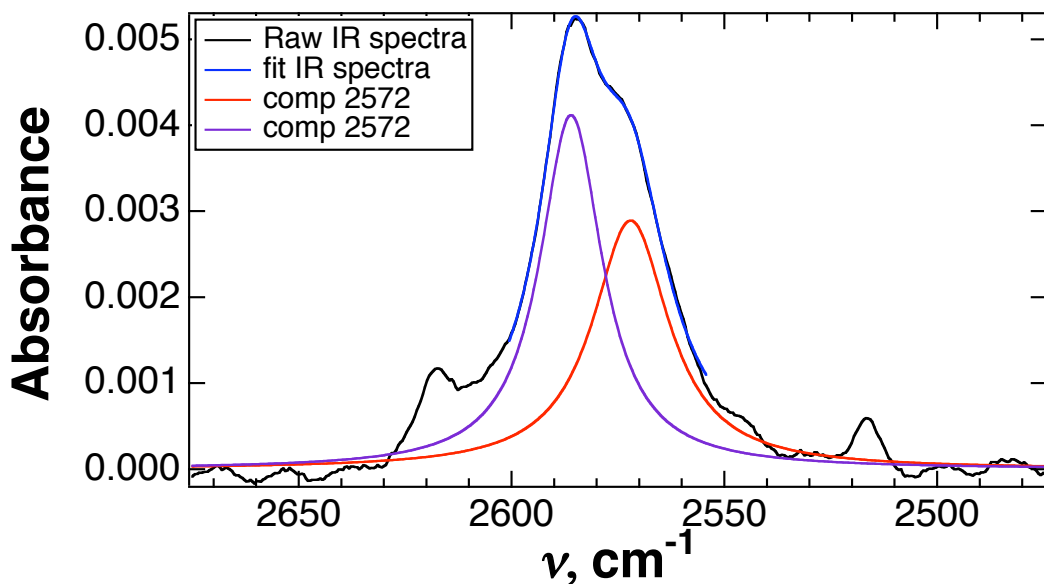

**Figure S67.** Fit and deconvolution of the infrared spectrum for the S–H stretching frequency of *p*-thiocresol in 400 mM toluene in CCl<sub>4</sub> (black). The S–H/ $\pi$  interactions are indicated: thiol association with toluene (2571 cm<sup>-1</sup>, red) and the non-interacting *p*-thiocresol thiol (2586 cm<sup>-1</sup>, purple).

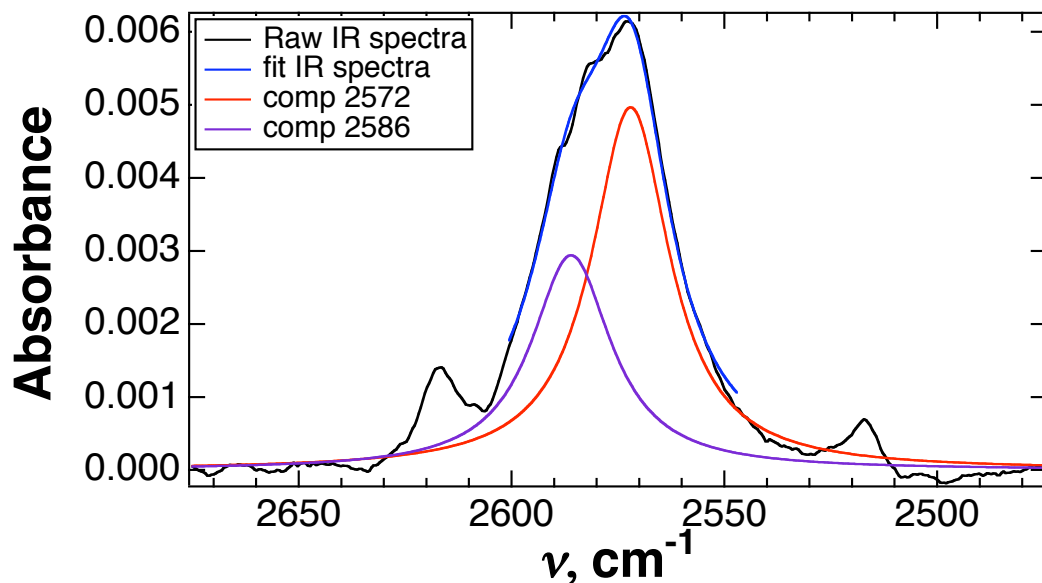

**Figure S68.** Fit and deconvolution of the infrared spectrum for the S–H stretching frequency of *p*-thiocresol in 800 mM toluene in CCl<sub>4</sub> (black). The S–H/ $\pi$  interactions are indicated: thiol association with toluene (2571 cm<sup>-1</sup>, red) and the non-interacting *p*-thiocresol thiol (2586 cm<sup>-1</sup>, purple).

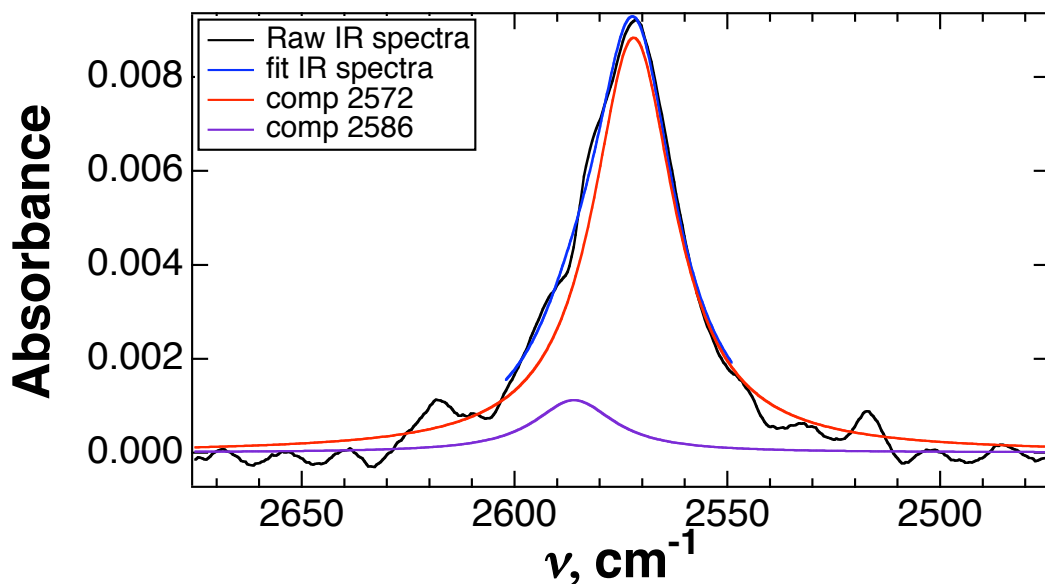

**Figure S69.** Fit and deconvolution of the infrared spectrum for the S–H stretching frequency of *p*-thiocresol in 1600 mM toluene in CCl<sub>4</sub> (black). The S–H/ $\pi$  interactions are indicated: thiol association with toluene (2571 cm<sup>-1</sup>, red) and the non-interacting *p*-thiocresol thiol (2586 cm<sup>-1</sup>, purple).

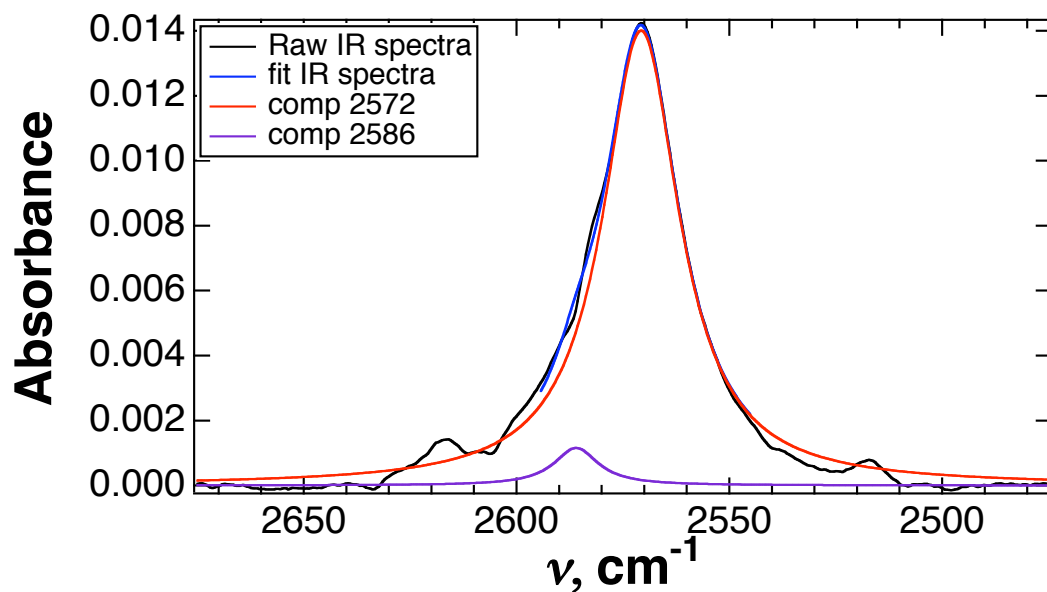

**Figure S70.** Fit and deconvolution of the infrared spectrum for the S–H stretching frequency of *p*-thiocresol in 3200 mM toluene in  $\text{CCl}_4$  (black). The S–H/ $\pi$  interactions are indicated: thiol association with toluene (2571  $\text{cm}^{-1}$ , red) and the non-interacting *p*-thiocresol thiol (2586  $\text{cm}^{-1}$ , purple).

### Titration of *p*-thiocresol with *m*-dichlorobenzene

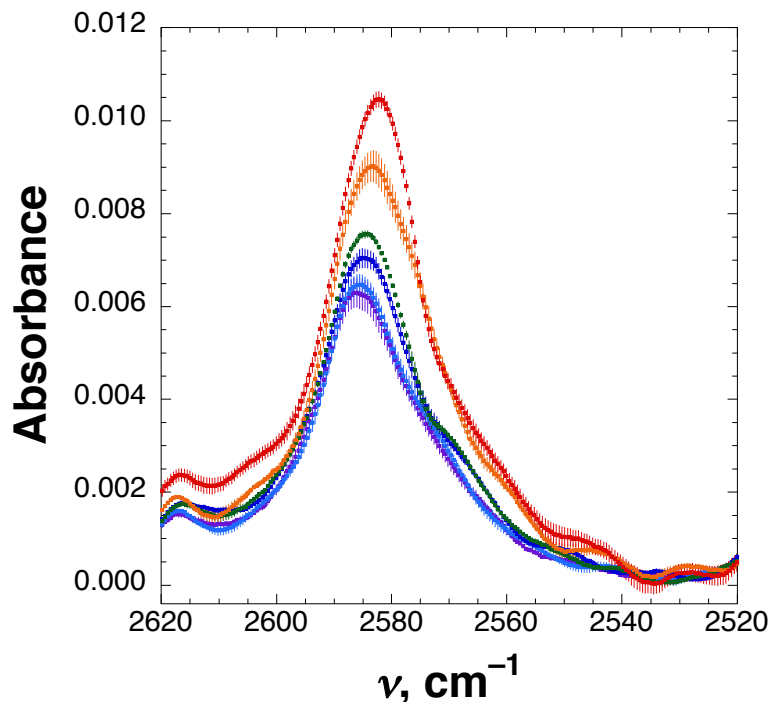

**Figure S71.** Infrared spectroscopy of the S–H stretching frequency of *p*-thiocresol (55 mM) in the presence of different concentrations of *m*-dichlorobenzene in CCl<sub>4</sub> (50 mM (magenta), 400 mM (light blue), 800 mM (blue), 1600 mM (dark green), 3200 mM (orange), and 4800 mM (red)). The peak at 2586 cm<sup>-1</sup> corresponds to the non-interacting S–H stretching frequency of *p*-thiocresol. The peak at 2581 cm<sup>-1</sup> corresponds to the S–H stretching frequency for the thiol hydrogen interacting with *m*-dichlorobenzene via an S–H/ $\pi$  interaction. The peak at 2581 cm<sup>-1</sup> increases in intensity with increasing 1-methylindole concentration, consistent with increased binding of the aromatic donor to the thiol hydrogen of *p*-thiocresol via an S–H/ $\pi$  interaction. The shoulder at 2572 cm<sup>-1</sup> is due to the S–H stretching of *p*-thiocresol self-association. Error bars indicate standard error.

Each of the IR spectra was fit with a three-component Lorentzian distribution function with the general formula

$$Y = Y_0 + \sum_{n=1}^3 \frac{A_n}{(x - x_n)^2 + B_n}$$

where  $Y_0$  is the offset in  $y$ -axis and  $A_n$  and  $B_n$  are maximum intensity and width of the distribution around the peak position at  $x_n$ .  $x_n$  was fixed at 2581, 2572, and 2586 cm<sup>-1</sup> for the interacting peak with the donor (*m*-dichlorobenzene), for the self-association of *p*-thiocresol, and for the non-interacting thiol peak, respectively.

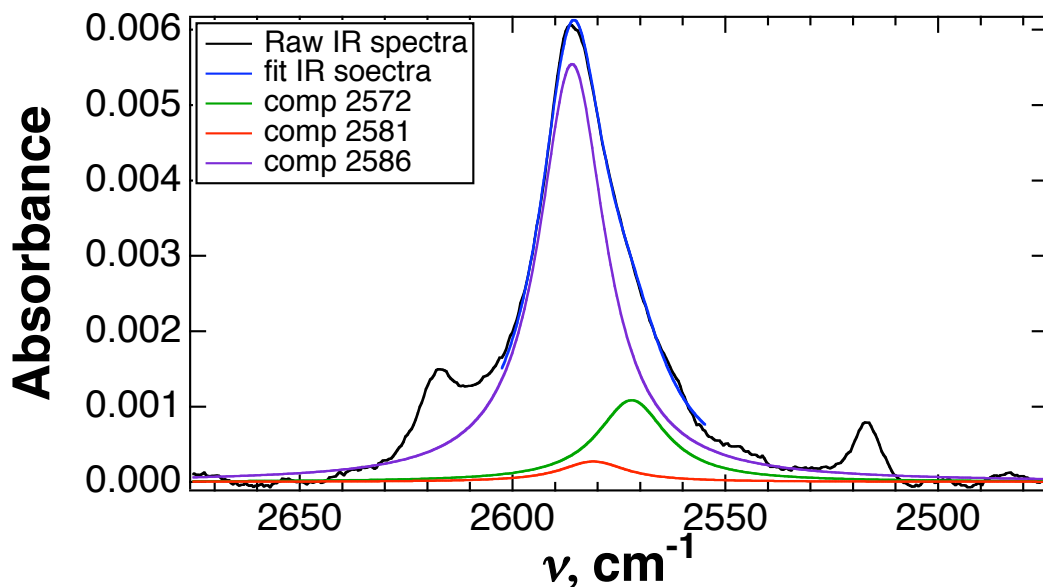

**Figure S72.** Fit and deconvolution of the infrared spectrum for the S–H stretching frequency of *p*-thiocresol in 50 mM *m*-dichlorobenzene in  $\text{CCl}_4$  (black). The S–H/ $\pi$  interactions are indicated: thiol association with *m*-dichlorobenzene ( $2581\text{ cm}^{-1}$ , red), *p*-thiocresol self-association ( $2572\text{ cm}^{-1}$ , green), and the non-interacting *p*-thiocresol thiol ( $2586\text{ cm}^{-1}$ , purple).

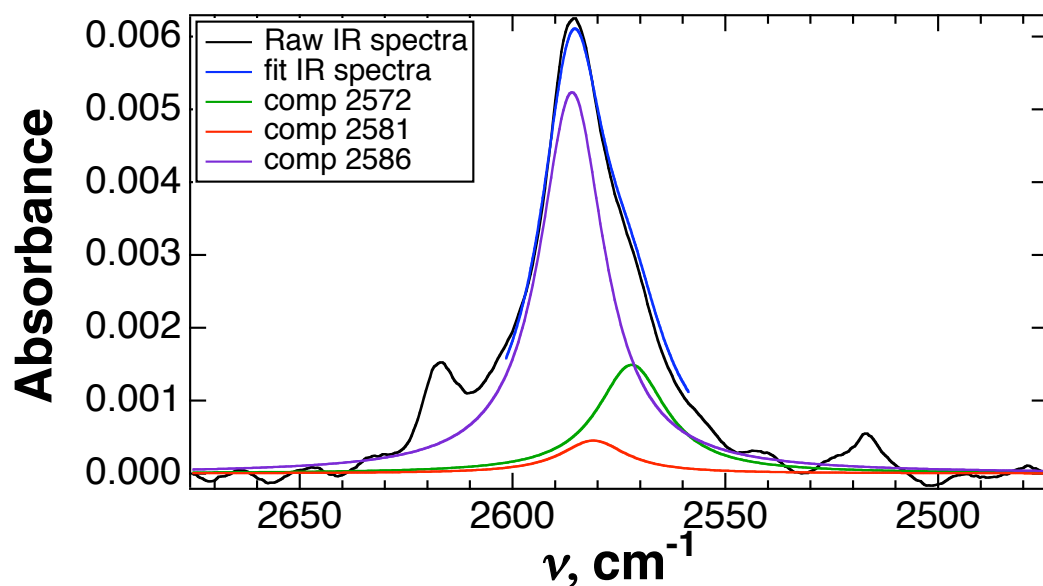

**Figure S73.** Fit and deconvolution of the infrared spectrum for the S–H stretching frequency of *p*-thiocresol in 400 mM *m*-dichlorobenzene in  $\text{CCl}_4$  (black). The S–H/ $\pi$  interactions are indicated: thiol association with *m*-dichlorobenzene ( $2581\text{ cm}^{-1}$ , red), *p*-thiocresol self-association ( $2572\text{ cm}^{-1}$ , green), and the non-interacting *p*-thiocresol thiol ( $2586\text{ cm}^{-1}$ , purple).

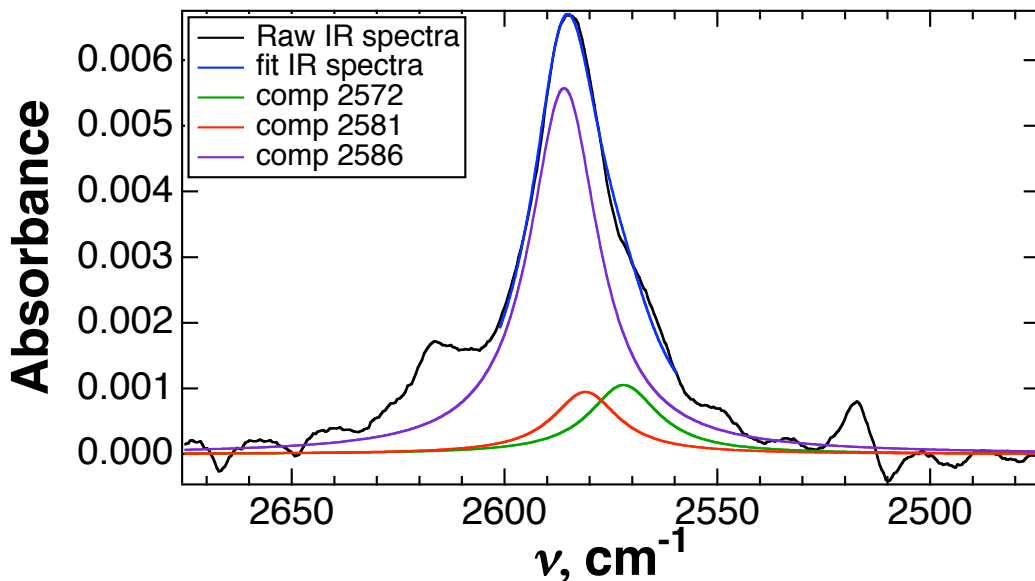

**Figure S74.** Fit and deconvolution of the infrared spectrum for the S–H stretching frequency of *p*-thiocresol in 800 mM *m*-dichlorobenzene in  $\text{CCl}_4$  (black). The S–H/ $\pi$  interactions are indicated: thiol association with *m*-dichlorobenzene (2581  $\text{cm}^{-1}$ , red), *p*-thiocresol self-association (2572  $\text{cm}^{-1}$ , green), and the non-interacting *p*-thiocresol thiol (2586  $\text{cm}^{-1}$ , purple).

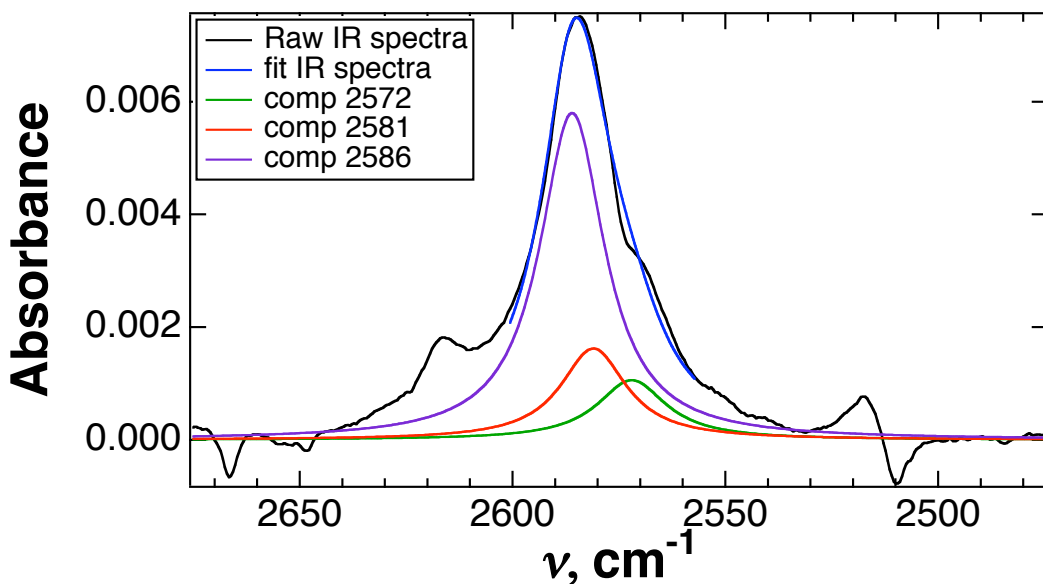

**Figure S75.** Fit and deconvolution of the infrared spectrum for the S–H stretching frequency of *p*-thiocresol in 1600 mM *m*-dichlorobenzene in  $\text{CCl}_4$  (black). The S–H/ $\pi$  interactions are indicated: thiol association with *m*-dichlorobenzene (2581  $\text{cm}^{-1}$ , red), *p*-thiocresol self-association (2572  $\text{cm}^{-1}$ , green), and the non-interacting *p*-thiocresol thiol (2586  $\text{cm}^{-1}$ , purple).



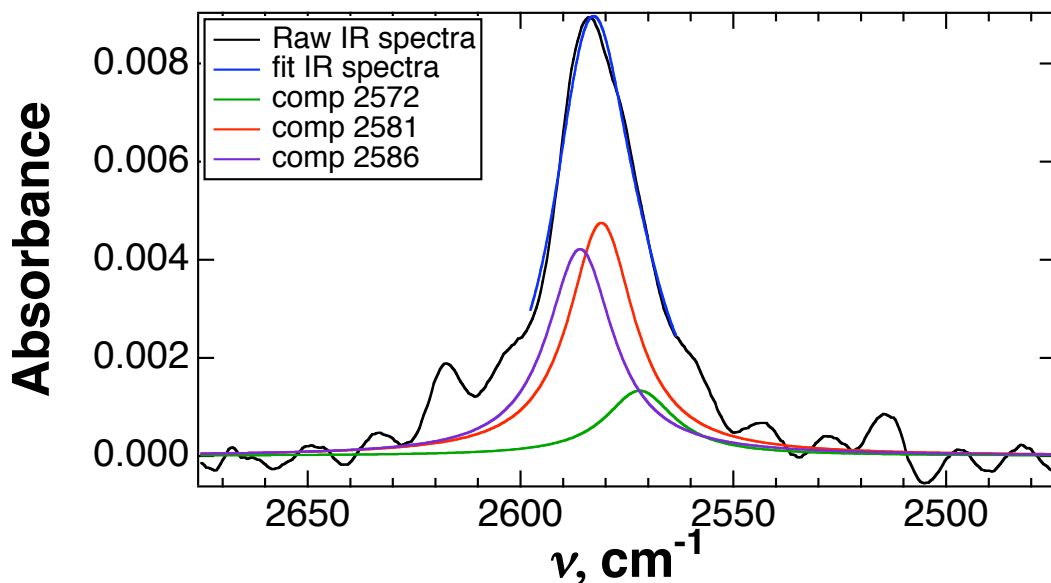

**Figure S76.** Fit and deconvolution of the infrared spectrum for the S–H stretching frequency of *p*-thiocresol in 3200 mM *m*-dichlorobenzene in  $\text{CCl}_4$  (black). The S–H/ $\pi$  interactions are indicated: thiol association with *m*-dichlorobenzene (2581  $\text{cm}^{-1}$ , red), *p*-thiocresol self-association (2572  $\text{cm}^{-1}$ , green), and the non-interacting *p*-thiocresol thiol (2586  $\text{cm}^{-1}$ , purple).

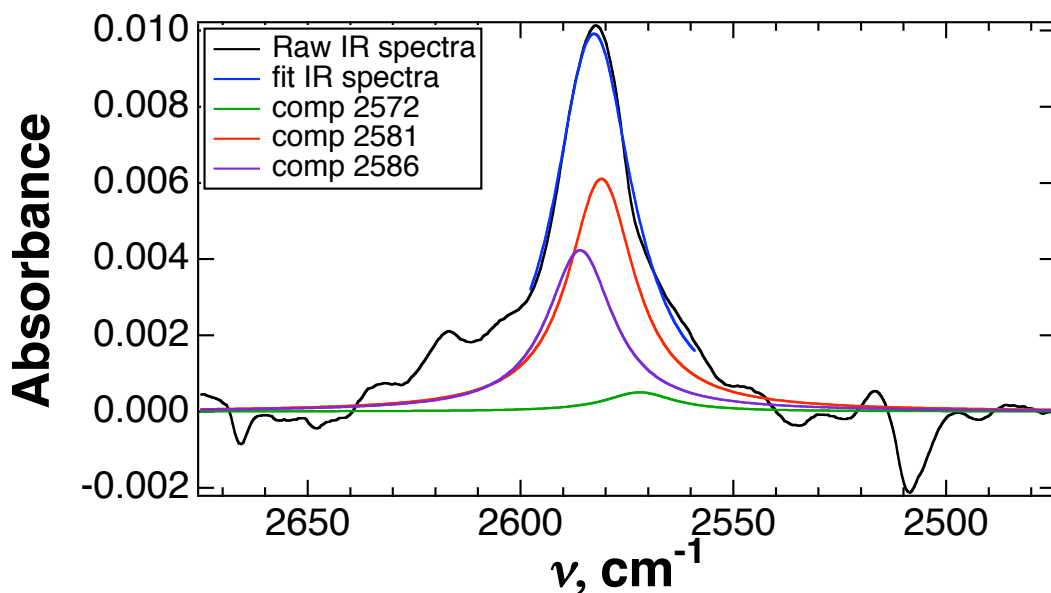

**Figure S77.** Fit and deconvolution of the infrared spectrum for the S–H stretching frequency of *p*-thiocresol in 4800 mM *m*-dichlorobenzene in  $\text{CCl}_4$  (black). The S–H/ $\pi$  interactions are indicated: thiol association with *m*-dichlorobenzene (2581  $\text{cm}^{-1}$ , red), *p*-thiocresol self-association (2572  $\text{cm}^{-1}$ , green), and the non-interacting *p*-thiocresol thiol (2586  $\text{cm}^{-1}$ , purple).

**Table S12.** Fitting parameters for Lorentzian deconvolution of the observed IR spectra (S–H stretching region) for *p*-thiocresol in the presence of different concentrations of aromatic donors. “Interacting” thiol component refers to the component of the IR spectrum that is due to association of the thiol with the aromatic donor, the “self-association” thiol component refers the component that is due to *p*-thiocresol dimerization, and the “non-interacting” thiol component refers to the component due to free thiol.

|                   | Concentration (mM) | “Interacting” thiol component |           |            | “Self-association” thiol component |           |            | “Non-interacting” thiol component |           |            |
|-------------------|--------------------|-------------------------------|-----------|------------|------------------------------------|-----------|------------|-----------------------------------|-----------|------------|
|                   |                    | Intensity (A1)                | Peak (x1) | width (B1) | Intensity (A2)                     | Peak (x2) | width (B2) | Intensity (A3)                    | peak (x3) | width (B3) |
| hexamethylbenzene | 12.5               | 0.0021                        | 2549      | 10.6       | 0.11823                            | 2572      | 96.25      | 0.55481                           | 2586      | 92.057     |
|                   | 25                 | 0.016186                      | 2549      | 46.737     | 0.25841                            | 2572      | 151.93     | 0.59644                           | 2586      | 89.907     |
|                   | 50                 | 0.04442                       | 2549      | 87.06      | 0.15144                            | 2572      | 109.57     | 0.51967                           | 2586      | 87.626     |
|                   | 100                | 0.24852                       | 2549      | 182.96     | 0.086763                           | 2572      | 67.376     | 0.49961                           | 2586      | 82.916     |
|                   | 200                | 0.44963                       | 2549      | 159.52     | 0.088938                           | 2572      | 68.649     | 0.45995                           | 2586      | 78.276     |
|                   | 400                | 0.8612                        | 2549      | 156.34     | 0.063471                           | 2572      | 60.642     | 0.43246                           | 2586      | 79.033     |
|                   | 800                | 1.8355                        | 2549      | 157.89     | 0.0027185                          | 2572      | 5.5905     | 0.34161                           | 2586      | 66.562     |
|                   |                    |                               |           |            |                                    |           |            |                                   |           |            |
| 1-methylindole    | 12.5               | -0.000458                     | 2561      | -802.66    | 0.048668                           | 2572      | 77.673     | 0.26903                           | 2586      | 83.474     |
|                   | 25                 | 0.0090527                     | 2561      | 39.708     | 0.0495                             | 2572      | 65.908     | 0.2931                            | 2586      | 83.803     |
|                   | 50                 | 0.010554                      | 2561      | 41.4       | 0.090871                           | 2572      | 107.78     | 0.24273                           | 2586      | 77.48      |
|                   | 100                | 0.087586                      | 2561      | 99.035     | 0.065904                           | 2572      | 78.672     | 0.26447                           | 2586      | 76.162     |
|                   | 200                | 0.14129                       | 2561      | 96.893     | 0.14096                            | 2572      | 142.95     | 0.18154                           | 2586      | 66.107     |
|                   | 400                | 0.57802                       | 2561      | 132.4      | 0.019338                           | 2573      | 40         | 0.25036                           | 2586      | 77.989     |
|                   | 800                | 1.1971                        | 2561      | 155.91     | 0                                  | 2572      | n.a.       | 0.14562                           | 2586      | 70         |
|                   | 1600               | 1.8293                        | 2561      | 151.25     | 0                                  | 2572      | n.a.       | 0.13504                           | 2586      | 70         |
| 3200              | 3.3919             | 2561                          | 160.96    | 0          | 2572                               | n.a.      | 0.01939    | 2586                              | 10.51     |            |
|                   |                    |                               |           |            |                                    |           |            |                                   |           |            |
| mesitylene        | 25                 | -0.00010336                   | 2563      | 6.28       | 0.18758                            | 2572      | 148.93     | 0.40852                           | 2586      | 85.372     |
|                   | 50                 | 0.020376                      | 2563      | 41.4       | 0.079376                           | 2572      | 65.9       | 0.44195                           | 2586      | 87.602     |
|                   | 100                | 0.11178                       | 2563      | 128.84     | 0.075624                           | 2572      | 68.16      | 0.44133                           | 2586      | 86.489     |
|                   | 200                | 0.23415                       | 2563      | 147.3      | 0.066159                           | 2572      | 68.16      | 0.38905                           | 2586      | 82.708     |
|                   | 400                | 0.51657                       | 2563      | 135.06     | 0.032541                           | 2572      | 40         | 0.39745                           | 2586      | 81.274     |
|                   | 800                | 0.96582                       | 2563      | 144.24     | 0.0011836                          | 2572      | 40         | 0.31901                           | 2586      | 73.577     |
|                   | 1600               | 1.6987                        | 2563      | 142.71     | 0                                  | 2572      | n.a.       | 0.18227                           | 2586      | 54.455     |
|                   | 3200               | 2.7458                        | 2563      | 135.54     | 0                                  | 2572      | n.a.       | 0.06639                           | 2586      | 28.776     |

Table S12 cont.

|                           | Concentration (mM) | "Interacting" thiol component |           |            | "Self-association" thiol component |           |            | "Non-interacting" thiol component |           |            |
|---------------------------|--------------------|-------------------------------|-----------|------------|------------------------------------|-----------|------------|-----------------------------------|-----------|------------|
|                           |                    | Intensity (A1)                | Peak (x1) | width (B1) | Intensity (A2)                     | Peak (x2) | width (B2) | Intensity (A3)                    | peak (x3) | width (B3) |
| toluene                   | 25                 | 0.084829                      | 2571      | 88.95      | n.a.                               | n.a.      | n.a.       | 0.41018                           | 2586      | 89.181     |
|                           | 50                 | 0.098218                      | 2571      | 79.545     | n.a.                               | n.a.      | n.a.       | 0.42377                           | 2586      | 85.446     |
|                           | 100                | 0.14115                       | 2571      | 102.17     | n.a.                               | n.a.      | n.a.       | 0.42656                           | 2586      | 91.388     |
|                           | 200                | 0.19954                       | 2571      | 96.791     | n.a.                               | n.a.      | n.a.       | 0.39699                           | 2586      | 79.945     |
|                           | 400                | 0.35317                       | 2571      | 119.53     | n.a.                               | n.a.      | n.a.       | 0.35963                           | 2586      | 83.414     |
|                           | 800                | 0.63168                       | 2571      | 124.24     | n.a.                               | n.a.      | n.a.       | 0.34296                           | 2586      | 106.63     |
|                           | 1600               | 1.257                         | 2571      | 142.85     | n.a.                               | n.a.      | n.a.       | 0.13271                           | 2586      | 77.86      |
|                           | 3200               | 1.6874                        | 2570.6    | 117.82     | n.a.                               | n.a.      | n.a.       | 0.067063                          | 2586      | 40         |
| <i>m</i> -dichlorobenzene | 50                 | 0.024254                      | 2581      | 88.39      | 0.12686                            | 2572      | 97         | 0.56101                           | 2586      | 88.521     |
|                           | 400                | 0.043575                      | 2581      | 88.39      | 0.1447                             | 2572      | 97         | 0.51153                           | 2586      | 84.052     |
|                           | 800                | 0.12037                       | 2581      | 88.39      | 0.13904                            | 2572      | 97         | 0.47225                           | 2586      | 81.547     |
|                           | 1600               | 0.19255                       | 2581      | 88.39      | 0.10948                            | 2572      | 97         | 0.4068                            | 2586      | 73.315     |
|                           | 3200               | 0.42045                       | 2581      | 88.39      | 0.1579                             | 2572      | 97         | 0.37081                           | 2586      | 75.543     |
|                           | 4800               | 0.54123                       | 2581      | 88.39      | 0.099708                           | 2572      | 97         | 0.41319                           | 2586      | 90         |

### Determination of the dissociation constants for *p*-thiocresol•aromatic donor complexes

The combined total area under the curve for the self-associated and non-associated *p*-thiocresol signals is expected to approach zero at limiting high concentration of the aromatic donor, following a 1:1 binding with the dissociation constant ( $K_d$ ) according to the scheme shown below:

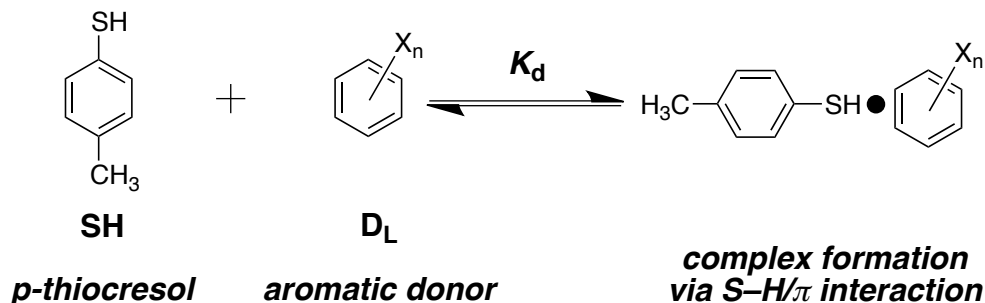

The total area of the observed components then varies according to the 1:1 binding equation as

$$Y = \frac{Y_0}{\text{SH}_t} \times \frac{\left[ -(\text{D}_L + K_d - \text{SH}_t) + \sqrt{(\text{D}_L + K_d - \text{SH}_t)^2 + 4(\text{SH}_t)(K_d)} \right]}{2}$$

[Equation S2]

where  $\text{D}_L$  = concentration of the aromatic donor  
 $\text{SH}_t$  = total concentration of *p*-thiocresol  
 $K_d$  = dissociation constant  
 $Y_0$  = signal in absence of donor.

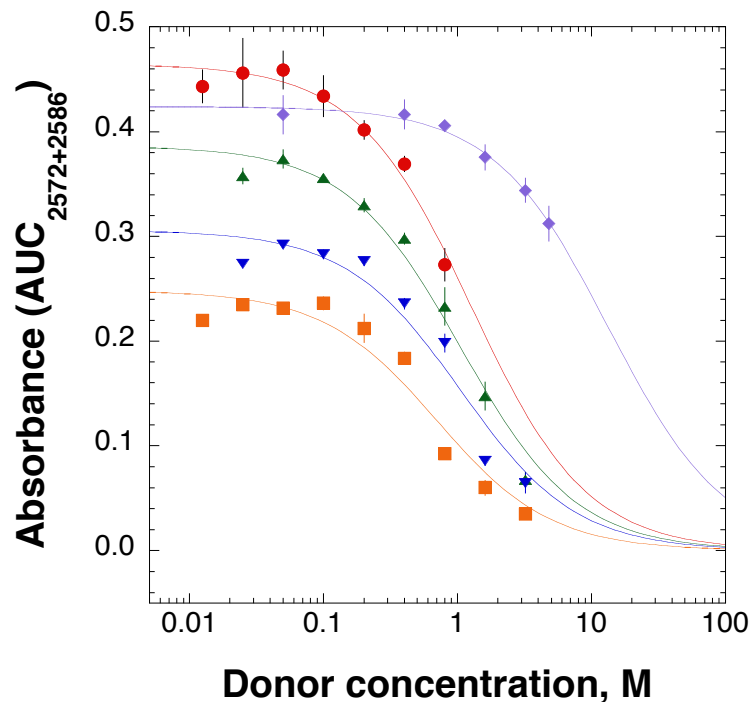

**Figure S78.** Determination of the dissociation constant for the complex of each interacting aromatic compound with *p*-thiocresol, measured as a function of the observed disappearance of the “non-interacting” thiol signal and the dimerized *p*-thiocresol species. The y-axis represents the total area under the curve (AUC) in the observed IR spectrum for the “non-interacting” and “self-associating” signals for *p*-thiocresol when titrated with aromatic donors: hexamethylbenzene (red, circles), 1-methylindole (orange, squares) mesitylene (green, triangles), toluene (blue, inverted triangles), and *m*-dichlorobenzene (violet, diamonds). The solid lines represent the best fit to the experimental data according to equation S2. Dissociation constants estimated from the disappearance of “non-interacting” and “self-interacting” species have the inherent limit of zero signal at complete saturation. Estimated dissociation constants are reported in Table S13. Error bars indicate standard error.

The dissociation constant can also be determined via the analysis of the area of the “interacting” thiol species by plotting its total area under the curve (AUC) as a function of the concentration of the aromatic donor. The total area for the interacting species follows the following equation:

$$Y = \frac{Y_0}{SH_t} \times \frac{\left[ (D_L + K_d + SH_t) - \sqrt{(D_L + K_d + SH_t)^2 - 4(SH_t)(D_L)} \right]}{2}$$

[Equation S3]

where  $D_L$  = concentration of the aromatic donor  
 $SH_t$  = total concentration of *p*-thiocresol  
 $K_d$  = dissociation constant  
 $Y_0$  = signal in absence of donor.

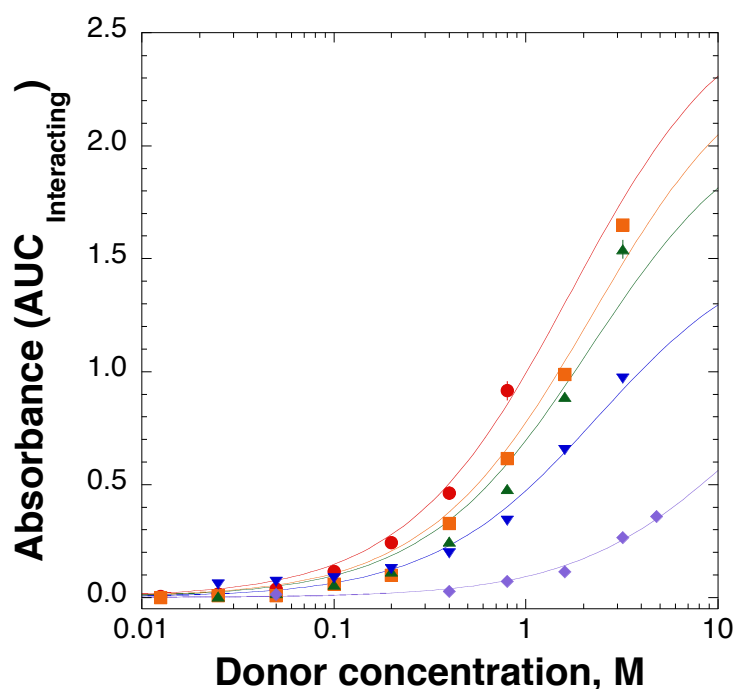

**Figure S79.** Determination of the dissociation constant for the complex of each interacting aromatic compound with *p*-thiocresol, measured as a function of the increasing “interacting” species. The y-axis represents the combined area under the curve (AUC) for the IR signal associated with the interaction of *p*-thiocresol when titrated with aromatic donors: hexamethylbenzene (red, circles), 1-methylindole (orange, squares), mesitylene (green, triangles), toluene (blue, inverted triangles), and *m*-dichlorobenzene (violet, diamonds). The solid lines represent the best fit for the experimental data according to equation S3. Dissociation constants estimated from the S–H stretching frequency due to interaction with aromatic compounds also have the additional error associated with the absence of saturation in the binding isotherms, and thus include the error in the extinction coefficient of the interacting form and in the maximum signal at saturation. Estimated dissociation constants are reported in Table S13. Error bars indicate standard error.

**Table S13.** Dissociation constants for S–H/ $\pi$  interactions.  $K_d$  values determined from the disappearance of the IR signal associated with the “non-interacting” thiol and the “self-interacting” thiol signal of *p*-thiocresol are listed as  $K_d$  non-interacting. Values based on the appearance of the interacting peak are indicated as  $K_d$  interacting. Dissociation constants estimated from the S–H stretching frequency due to interaction with aromatic compounds also have the additional error associated with the absence of saturation in binding isotherms, and thus include the additional errors, in the extinction coefficient of the interacting form and in the maximum signal at saturation. Dissociation constants estimated from the disappearance of “non-interacting” and “self-interacting” species have the inherent limit of zero signal at complete saturation.

| donor                     | $K_d$ , kcal mol <sup>-1</sup>      |                                 |
|---------------------------|-------------------------------------|---------------------------------|
|                           | Determined via non-interacting peak | Determined via interacting peak |
| <i>m</i> -dichlorobenzene | 13.5 ± 0.9                          | 13.1 ± 0.6                      |
| toluene                   | 1.03 ± 0.13                         | 2.34 ± 0.14                     |
| mesitylene                | 1.03 ± 0.13                         | 2.12 ± 0.25                     |
| 1-methylindole            | 0.69 ± 0.11                         | 2.18 ± 0.17                     |
| hexamethylbenzene         | 1.25 ± 0.14                         | 1.68 ± 0.09                     |

## Estimation of $\Delta H$ and $\Delta S$ for the S–H/ $\pi$ interaction: Temperature-dependent IR spectroscopy of *p*-thiocresol in the presence of aromatic donors

An in-house temperature-controlled cell holder was built by wrapping copper tubing around the standard IR cell and connecting the tubing to a chiller with temperature control. Temperatures were read directly from the cell holder using a thermocouple. The temperature readings from the chiller and the thermocouple were within  $\pm 0.5$  °C. Samples were allowed to equilibrate for at least 30 minutes prior to acquisition of each IR spectrum. Data were fit to a two-component Lorentzian function. The area under the curve for the non-interacting thiol species at  $2586\text{ cm}^{-1}$  was used to determine the fraction bound and unbound.

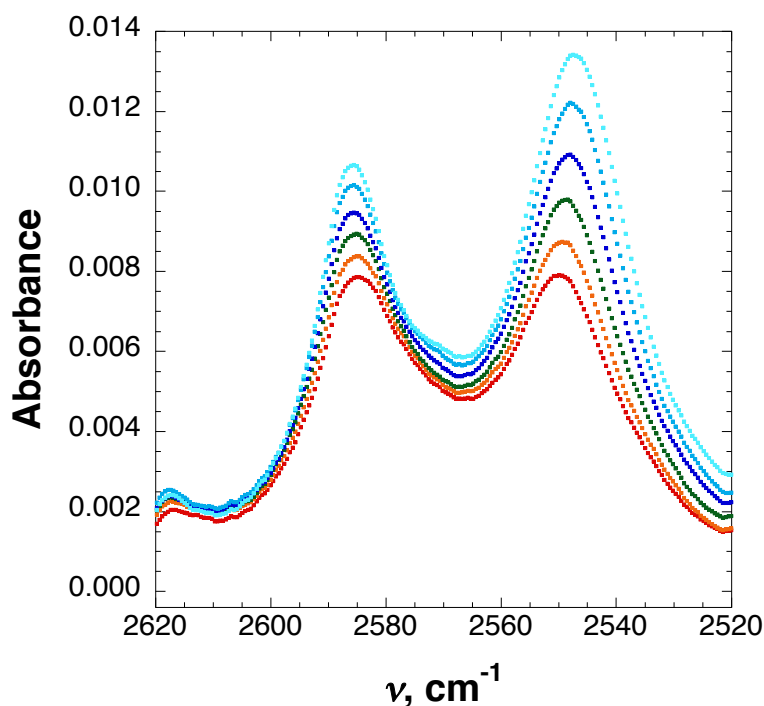

**Figure S80.** Temperature-dependent infrared spectroscopy of the S–H stretching frequency of *p*-thiocresol (55 mM) in presence of 400 mM hexamethylbenzene at  $-8$  °C (cyan),  $0$  °C (indigo),  $10$  °C (blue),  $20$  °C (green),  $30$  °C (orange), and  $40$  °C (red).



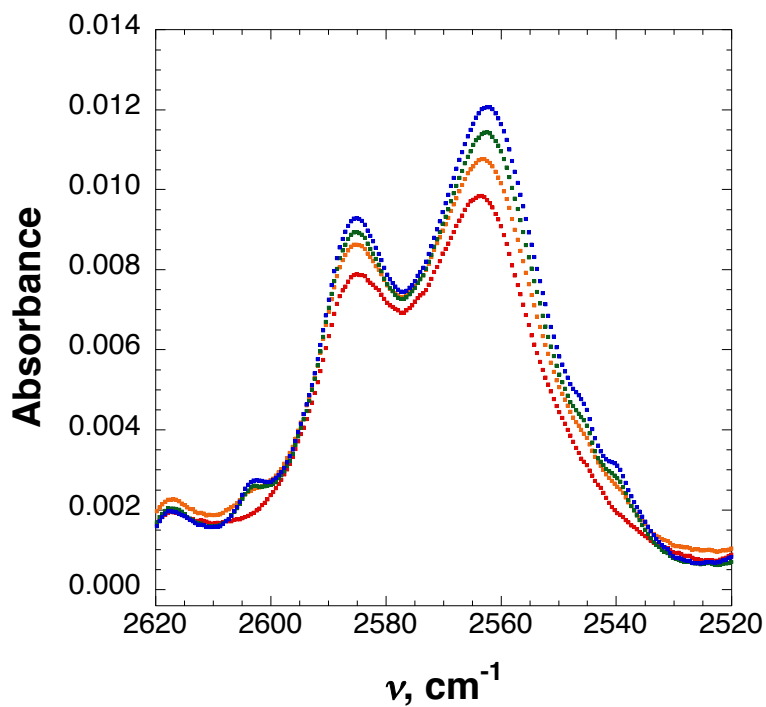

**Figure S81.** Temperature-dependent infrared spectroscopy of the S–H stretching frequency of *p*-thiocresol (55 mM) in presence of 400 mM mesitylene at  $-4.8$  °C (blue),  $0$  °C (green),  $10$  °C (orange), and  $20$  °C (red).

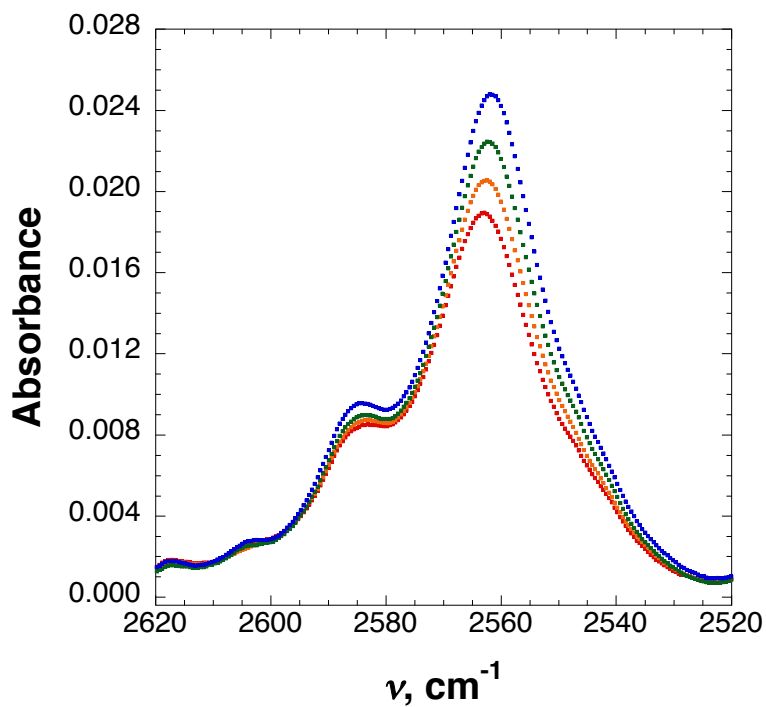

**Figure S82.** Temperature-dependent infrared spectroscopy of the S–H stretching frequency of *p*-thiocresol (55 mM) in presence of 1600 mM mesitylene at  $-9$  °C (blue),  $0$  °C (green),  $10$  °C (orange), and  $20$  °C (red).

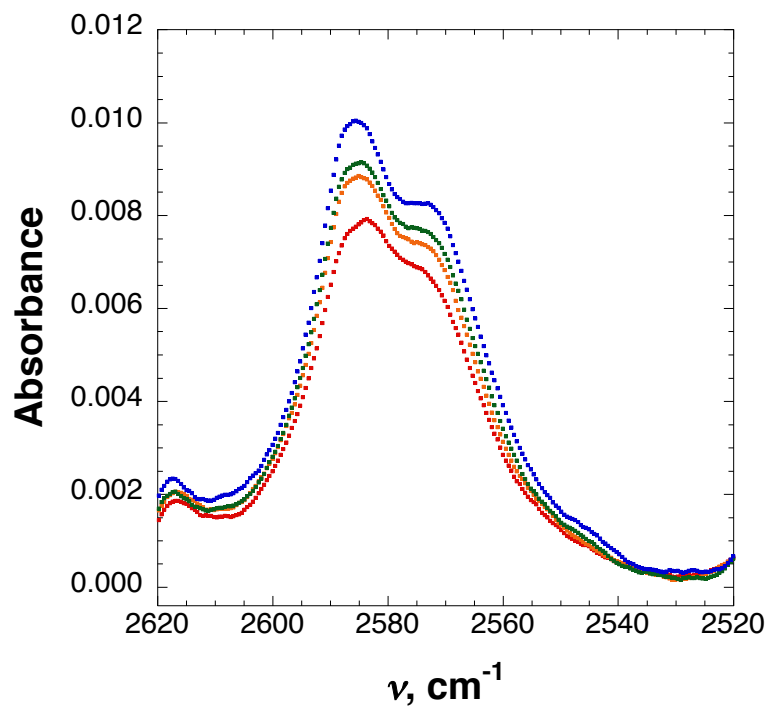

**Figure S83.** Temperature-dependent infrared spectroscopy for the S–H stretching frequency of *p*-thiocresol (55 mM) in presence of 400 mM toluene at 0 °C (blue), 10 °C (green), 20 °C (orange), and 30 °C (red).

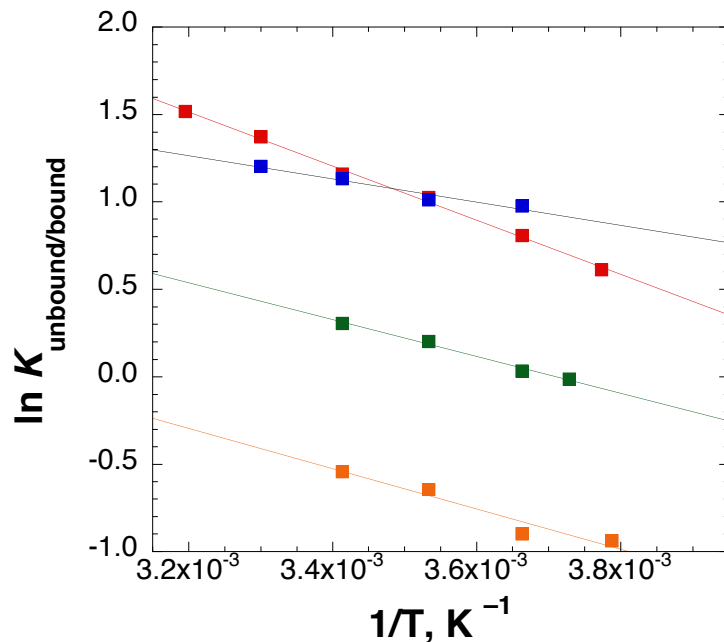

**Figure S84.** van't Hoff plots for the interactions of *p*-thiocresol with 400 mM hexamethylbenzene (red), 400 mM mesitylene (green), 1600 mM mesitylene (orange), and 400 mM toluene (blue). All experiments were conducted on a single sample with 55 mM *p*-thiocresol.

**Table S14.** Calculated enthalpy ( $\Delta H$ ) and entropy ( $\Delta S$ ) for the dissociation of the thiol-aromatic complex to the free, non-interacting thiol.

| Aromatic Donor           | $\Delta H$ , kcal mol <sup>-1</sup> | $\Delta S$ , cal mol <sup>-1</sup> K <sup>-1</sup> |
|--------------------------|-------------------------------------|----------------------------------------------------|
| 400 mM hexamethylbenzene | 2.9 ± 0.3                           | 12.6 ± 1.3                                         |
| 450 mM hexamethylbenzene | 3.1 ± 0.1                           | 12.9 ± 0.8                                         |
| 400 mM mesitylene        | 2.1 ± 0.1                           | 7.8 ± 0.4                                          |
| 1600 mM mesitylene       | 2.3 ± 0.4                           | 6.8 ± 1.2                                          |
| 400 mM toluene           | 1.3 ± 0.2                           | 6.7 ± 1.0                                          |

## Solid-State Magic-Angle-Spinning (MAS) $^{13}\text{C}$ NMR of Boc-L-4-thiophenylalanine *tert*-butyl ester (**1**) and *p*-thiocresol

$^{13}\text{C}$  CP/MAS experiments were conducted using a 4.0 mm HX or a 3.2 mm HCN solid-state magic-angle-spinning (MAS) probe on a Bruker Avance III spectrometer operating at a proton Larmor frequency of 500.13 MHz. All spectra were obtained at  $298 \pm 2$  K and CP/MAS experiments were carried out with a sample spinning rate of  $10,000 \pm 2$  Hz with a 4 mm rotor or  $14,000 \pm 2$  Hz with a 3.2 mm rotor. TPPM decoupling during CP/MAS data acquisition was provided by a 104.2-kHz proton decoupling field. For CP/MAS spectra, the contact time was 3 ms. Solid-state  $^{13}\text{C}$ - $^1\text{H}$  HETCOR spectra were acquired with a 3.2 mm HCN MAS probe at a spinning rate of 14,000 Hz. The mixing time was set to either 300 or 1000  $\mu\text{sec}$ . During the  $t_1$  evolution period, proton homonuclear decoupling with the FSLG scheme was applied to enhance proton resolution.<sup>2</sup>

All  $^{13}\text{C}$  chemical shifts were referenced externally via the resonance of adamantane at an isotropic chemical shift relative to tetramethylsilane (TMS) of 38.55 ppm.

Solid samples of *p*-thiocresol were used as purchased, consistent with the crystals used in X-ray diffraction and in obtaining the crystalline FT-IR spectrum. Solid samples of **1** were obtained by precipitation from hexanes, and the solids were filtered and dried. The solids were redissolved in 20% ethyl acetate in hexanes and the solution was warmed until all of the material had dissolved, and the sample was allowed to recrystallize. The sample appeared to contain a mixture of solids and crystals. FT-IR spectroscopy conducted after CP/MAS NMR indicated an identical IR spectrum to that obtained on crystalline material.  $^{13}\text{C}$  chemical shift assignments for *p*-thiocresol were obtained from HSQC and HMBC experiments in  $\text{CDCl}_3$ , and were compared by analogy to the chemical shifts observed in the solid-state NMR spectra.  $^{13}\text{C}$  chemical shift assignments for **1** were obtained directly from solid-state  $^{13}\text{C}$ - $^1\text{H}$  HETCOR spectra.

**Table S15.**  $^{13}\text{C}$  and  $^1\text{H}$  chemical shift assignments for **1** in solution ( $\text{CDCl}_3$ ) and in the solid state. Carbon chemical shifts were assigned using the  $^1\text{H}$ - $^{13}\text{C}$  HMBC NMR spectrum in solution and the solid-state  $^{13}\text{C}$ - $^1\text{H}$  HETCOR NMR spectrum (Figure S85, S87).

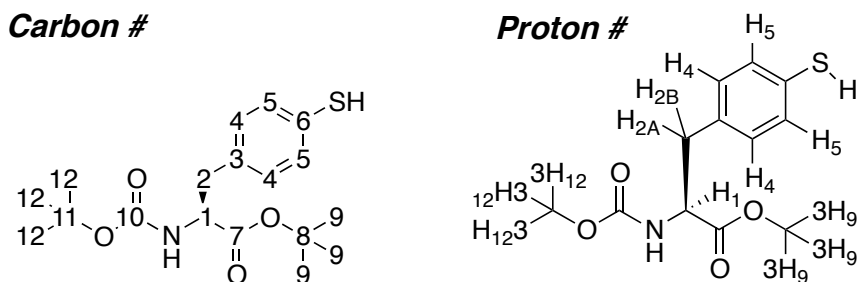

| Atom #   | Assignment                               | $\text{CDCl}_3$ $\delta$ , ppm | Solid State $\delta$ , ppm | $\Delta\delta$ , ppm |
|----------|------------------------------------------|--------------------------------|----------------------------|----------------------|
| C7       | Carbonyl, <i>tert</i> -butyl ester       | 170.8                          | 175.4                      | 4.7                  |
| C10      | Carbonyl, Boc                            | 155.0                          | 156.3                      | 1.3                  |
| C3       | $\text{C}_{\text{Aro}}$ , ipso           | 134.0                          | 135.1                      | 1.1                  |
| C5       | $\text{C}_{\text{Aro}}$ , meta           | 130.3                          | 131.4 <sup>a</sup>         | 1.2                  |
| C4       | $\text{C}_{\text{Aro}}$ , ortho          | 129.5                          | 131.4 <sup>a</sup>         | 1.9                  |
| C6       | $\text{C}_{\text{Aro}}$ , para           | 128.9                          | 129.6                      | 0.8                  |
| C8       | C, <i>tert</i> -butyl ester              | 82.2                           | 82.2                       | 0.0                  |
| C11      | C, Boc                                   | 79.7                           | 80.4                       | 0.7                  |
| C1       | $\text{C}_\alpha$                        | 54.7                           | 58.9                       | 4.3                  |
| C2       | $\text{C}_\beta$                         | 37.9                           | 36.0                       | -1.9                 |
| C12      | $\text{CH}_3$ , Boc                      | 28.3                           | 28.6 <sup>a</sup>          | 0.3                  |
| C9       | $\text{CH}_3$ , <i>tert</i> -butyl ester | 28.0                           | 28.6 <sup>a</sup>          | 0.6                  |
| SH       | Thiol                                    | 3.4                            | 6.2                        | 2.8                  |
| NH       | Carbamate                                | 5.0                            | 7.4                        | 2.4                  |
| H5       | $\text{H}_{\text{Aro}}$ , meta           | 7.2                            | 7.6 <sup>a</sup>           | 0.4                  |
| H4       | $\text{H}_{\text{Aro}}$ , ortho          | 7.0                            | 7.6 <sup>a</sup>           | 0.6                  |
| H1       | $\text{H}_\alpha$                        | 4.4                            | 4.6                        | 0.2                  |
| H2A, H2B | $\text{H}_\beta$                         | 3.0                            | 3.3                        | 0.3                  |
| H12      | Methyl, Boc                              | 1.4                            | 1.7 <sup>a</sup>           | 0.3                  |
| H9       | Methyl, <i>tert</i> -butyl ester         | 1.4                            | 1.7 <sup>a</sup>           | 0.3                  |

<sup>a</sup> Peaks were not resolved in solid-state NMR spectra.

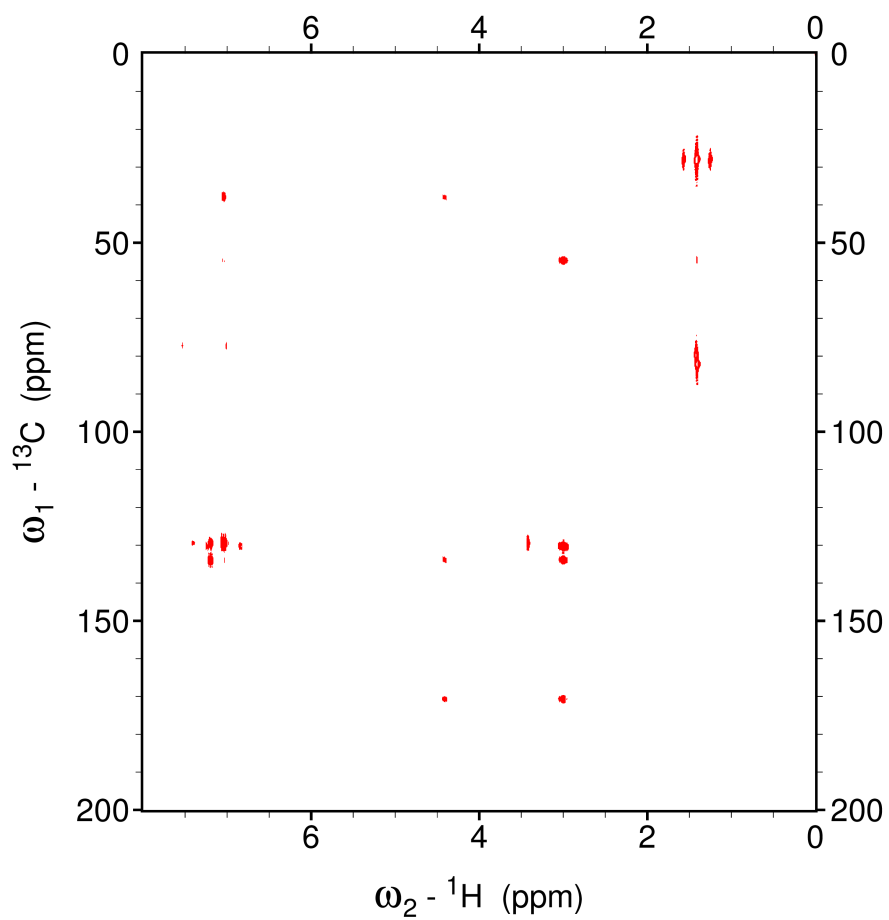

**Figure S85.** Solution  $^1\text{H}$ - $^{13}\text{C}$  HMBC spectrum of **1** in  $\text{CDCl}_3$ .

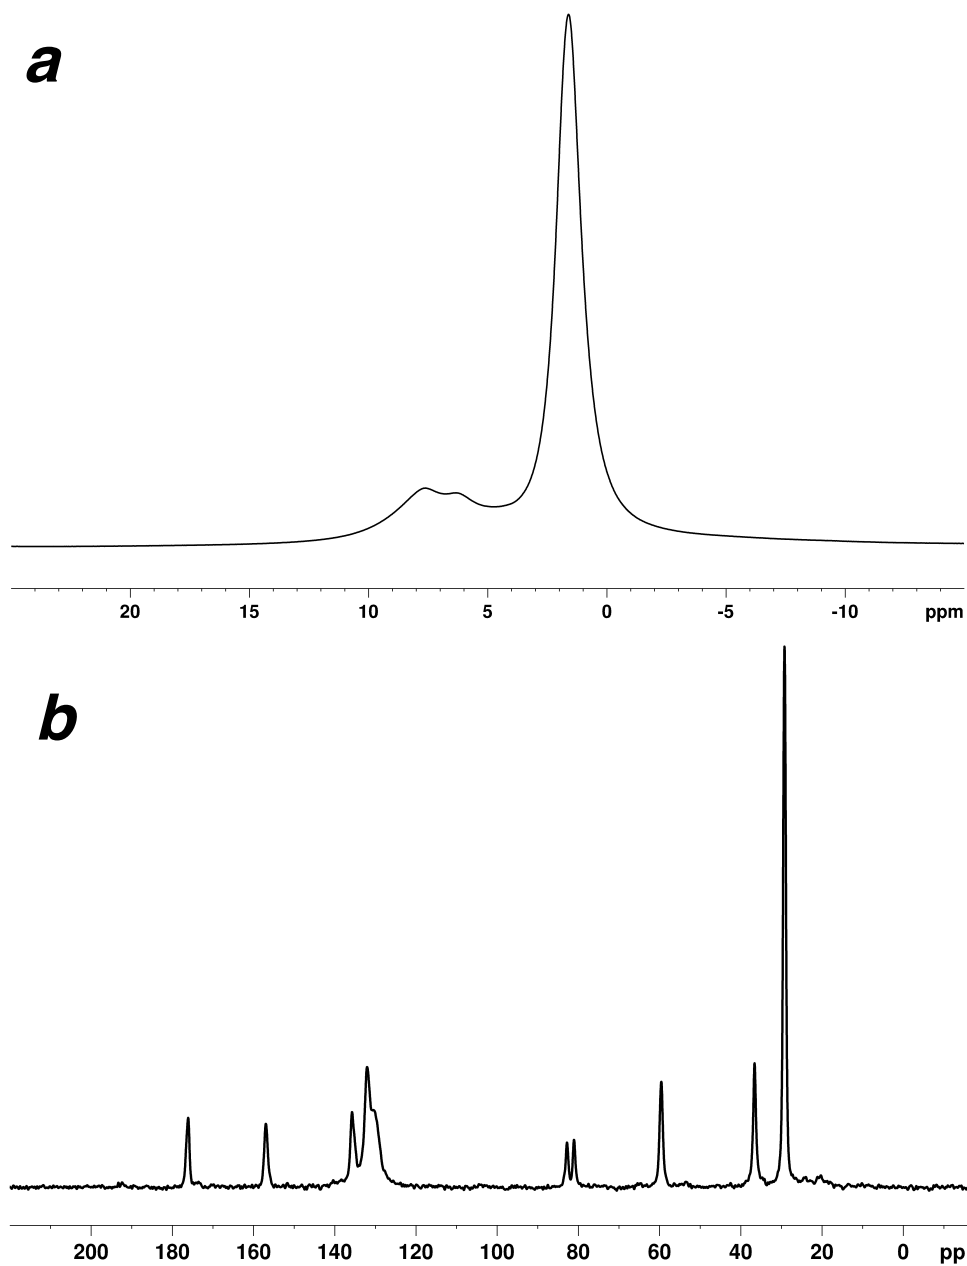

**Figure S86.** Solid-state NMR spectra of **1**. (a)  $^1\text{H}$  MAS NMR spectrum and (b)  $^{13}\text{C}$  CP/MAS NMR spectrum.

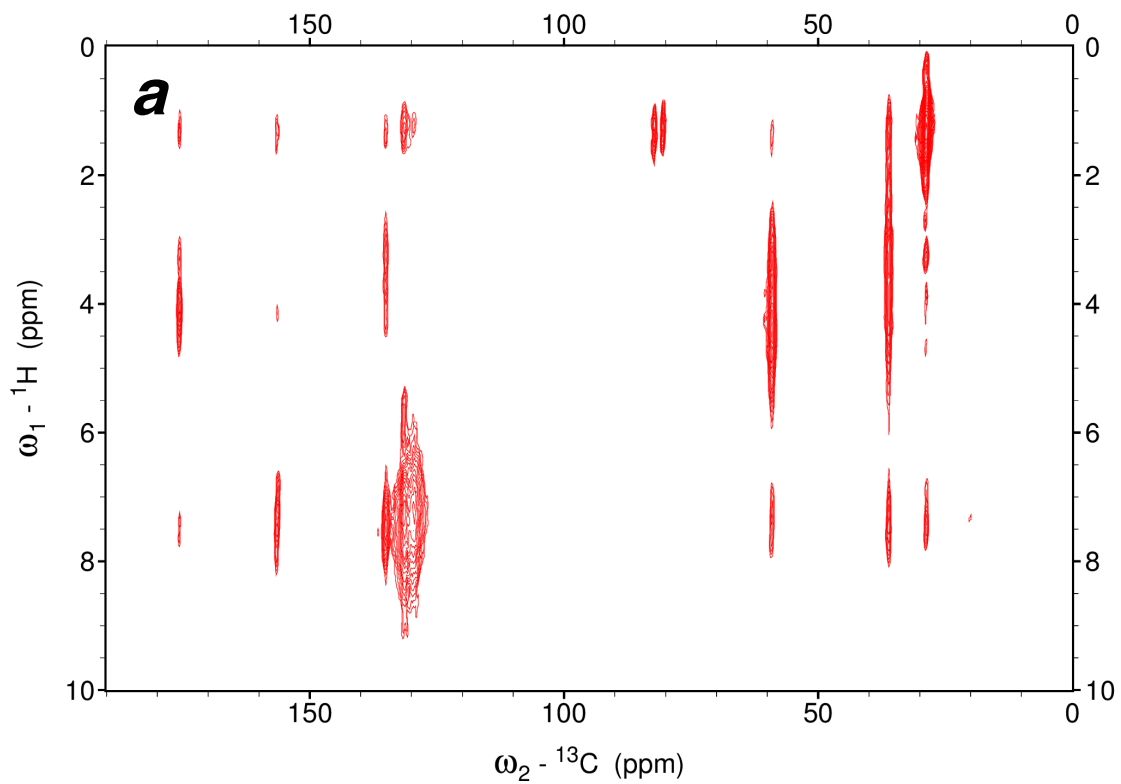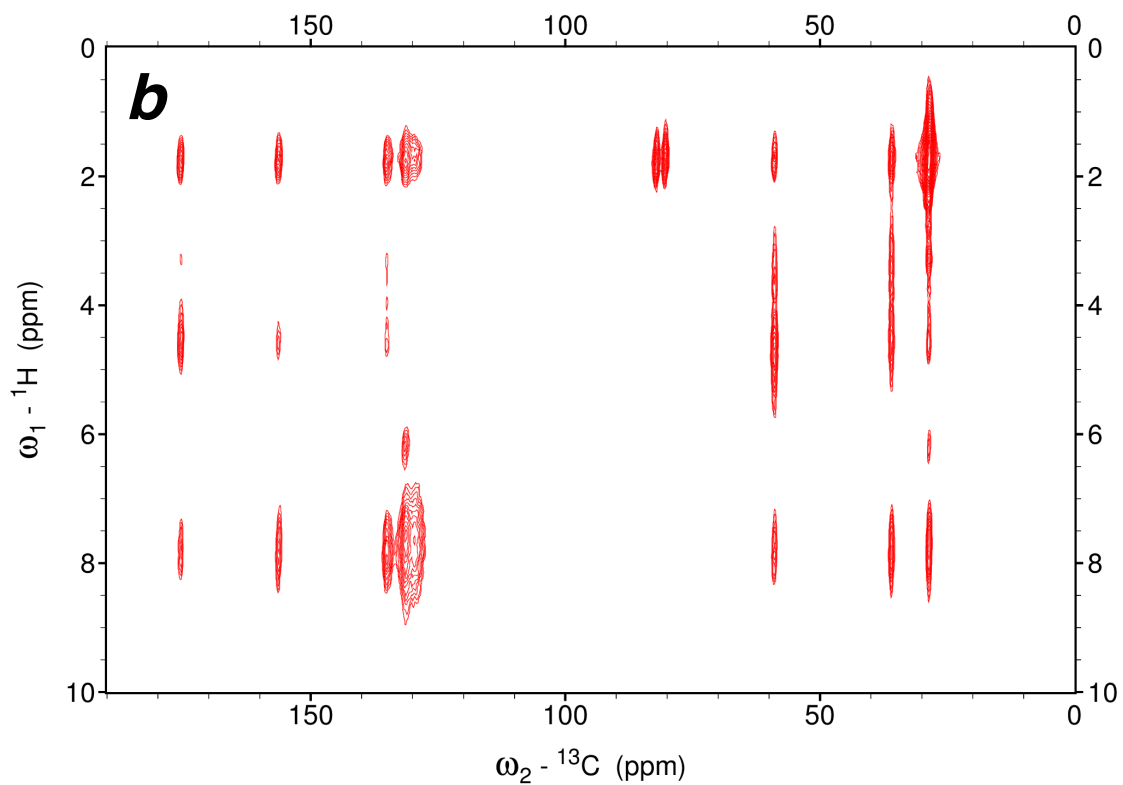

**Figure S87.** Solid-state  ${}^{13}\text{C}$ - ${}^1\text{H}$  HETCOR spectrum of **1** using a mixing time of (a) 300  $\mu\text{sec}$  or (b) 1000  $\mu\text{sec}$ .



**Table S16.**  $^{13}\text{C}$  and  $^1\text{H}$  chemical shift assignments for *p*-thiocresol in solution ( $\text{CDCl}_3$ ) and in the solid state. Carbon chemical shifts in  $\text{CDCl}_3$  were assigned using  $^1\text{H}$ - $^{13}\text{C}$  HMBC,  $^1\text{H}$ - $^{13}\text{C}$  HSQC, NMR spectra in solution and the solid-state  $^{13}\text{C}$ - $^1\text{H}$  HETCOR NMR spectrum (Figure S88-89, S93).

**Carbon #**

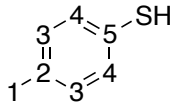

**Proton #**



| atom# | Assignment                      | $\text{CDCl}_3$ $\delta$ , ppm | Solid State $\delta$ , ppm | $\Delta\delta$ , ppm |
|-------|---------------------------------|--------------------------------|----------------------------|----------------------|
| C2    | $\text{C}_{\text{Aro}}$ , ipso  | 135.6                          | 133.0                      | 2.6                  |
| C4    | $\text{C}_{\text{Aro}}$ , meta  | 129.9                          | 129.5                      | 0.4                  |
| C3    | $\text{C}_{\text{Aro}}$ , ortho | 129.8                          | 128.3                      | 1.5                  |
| C5    | $\text{C}_{\text{Aro}}$ , para  | 126.6                          | 126.8                      | -0.2                 |
| C1    | $\text{CH}_3$                   | 20.9                           | 20.2                       | 0.7                  |
| SH    | Thiol                           | 3.4                            | 5.0, 3.2                   | 1.6, -0.2            |
| H4    | $\text{H}_{\text{Aro}}$ , meta  | 7.0                            | 7.1 <sup>a</sup>           | 0.1                  |
| H3    | $\text{H}_{\text{Aro}}$ , ortho | 7.2                            | 7.1 <sup>a</sup>           | -0.1                 |
| H1    | Methyl                          | 2.3                            | 2.4                        | 0.1                  |

<sup>a</sup> Peaks were not resolved in solid-state NMR spectra.

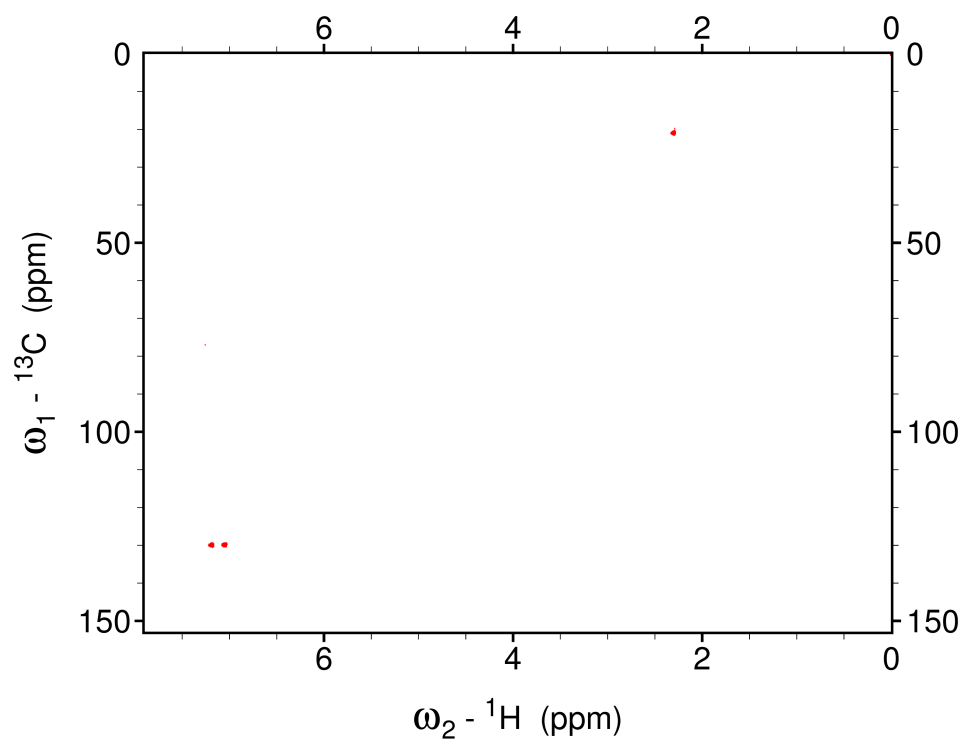

**Figure S88.** Solution  ${}^1\text{H}$ - ${}^{13}\text{C}$  HSQC spectrum of *p*-thiocresol in  $\text{CDCl}_3$ .

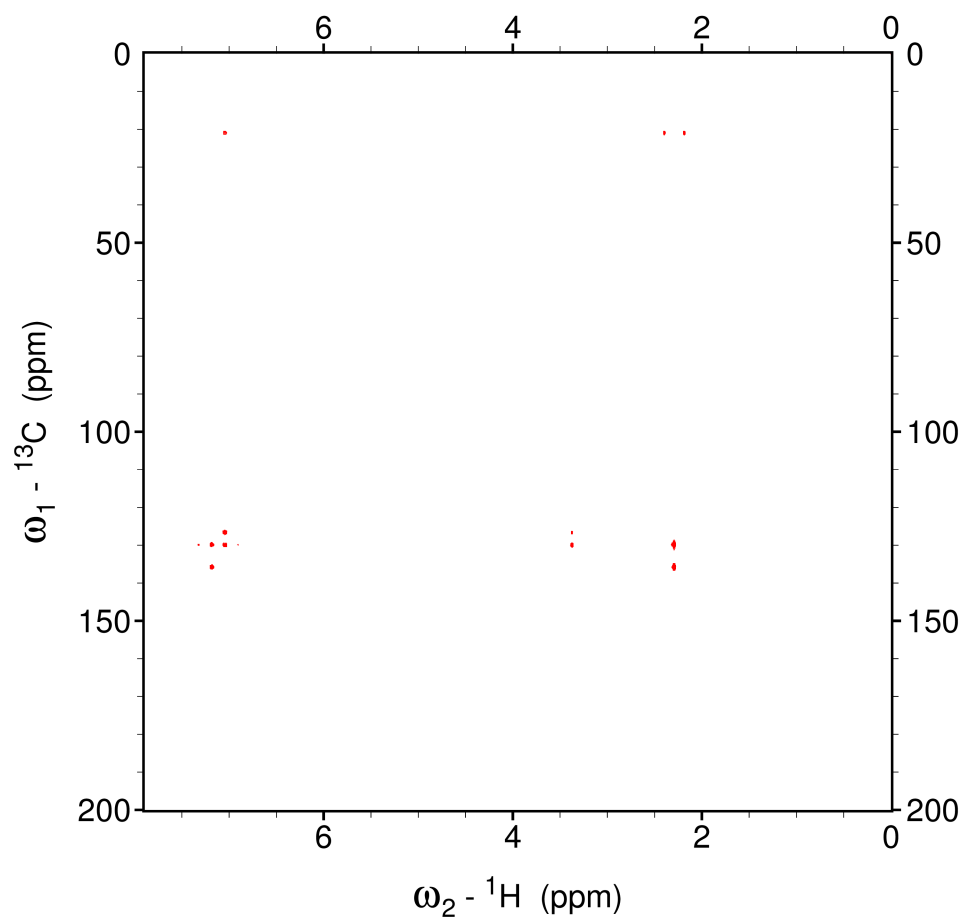

**Figure S89.** Solution  $^1\text{H}$ - $^{13}\text{C}$  HMBC spectrum of *p*-thiocresol in  $\text{CDCl}_3$ .

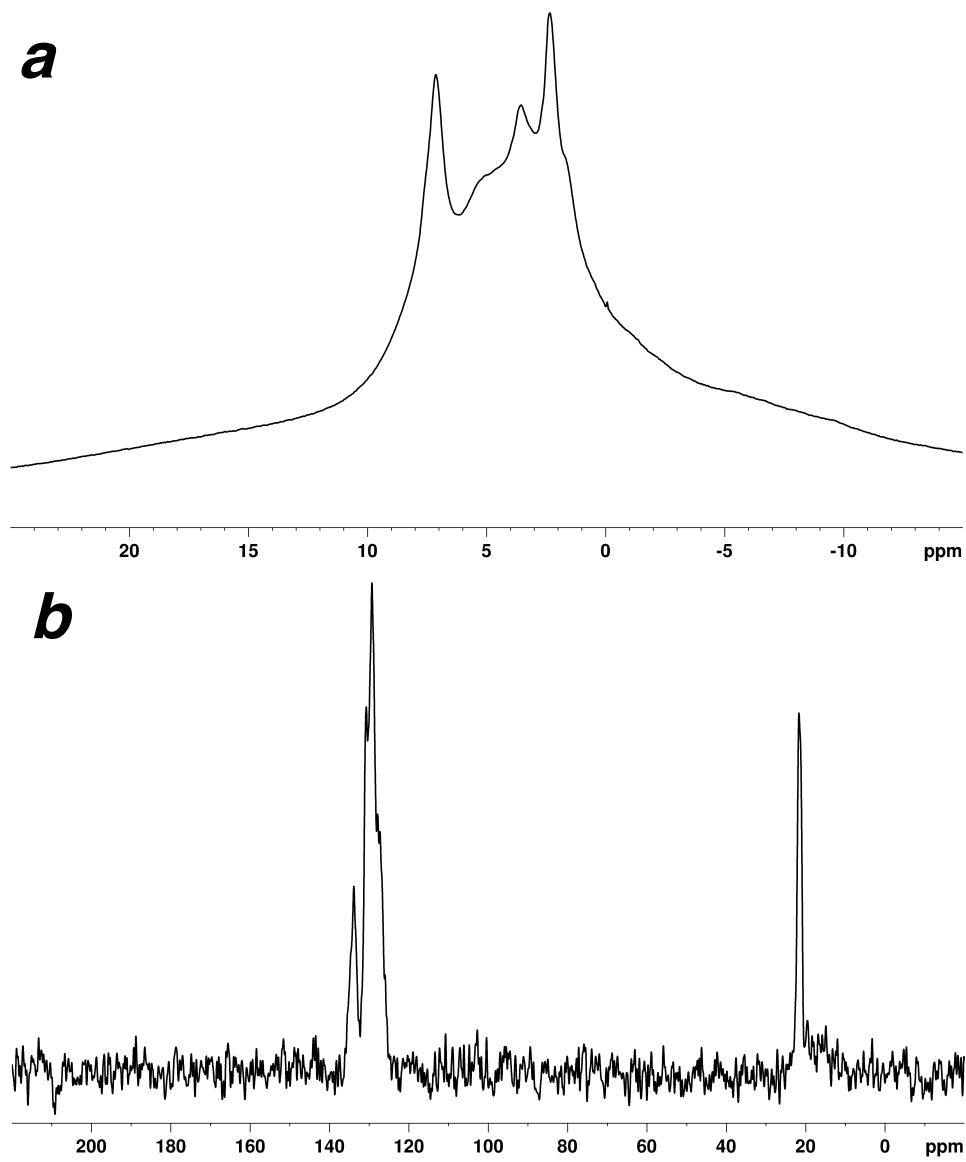

**Figure S90.** Solid-state NMR spectra of *p*-thiocresol. (a)  $^1\text{H}$  MAS NMR spectrum and (b)  $^{13}\text{C}$  CP/MAS NMR spectrum.

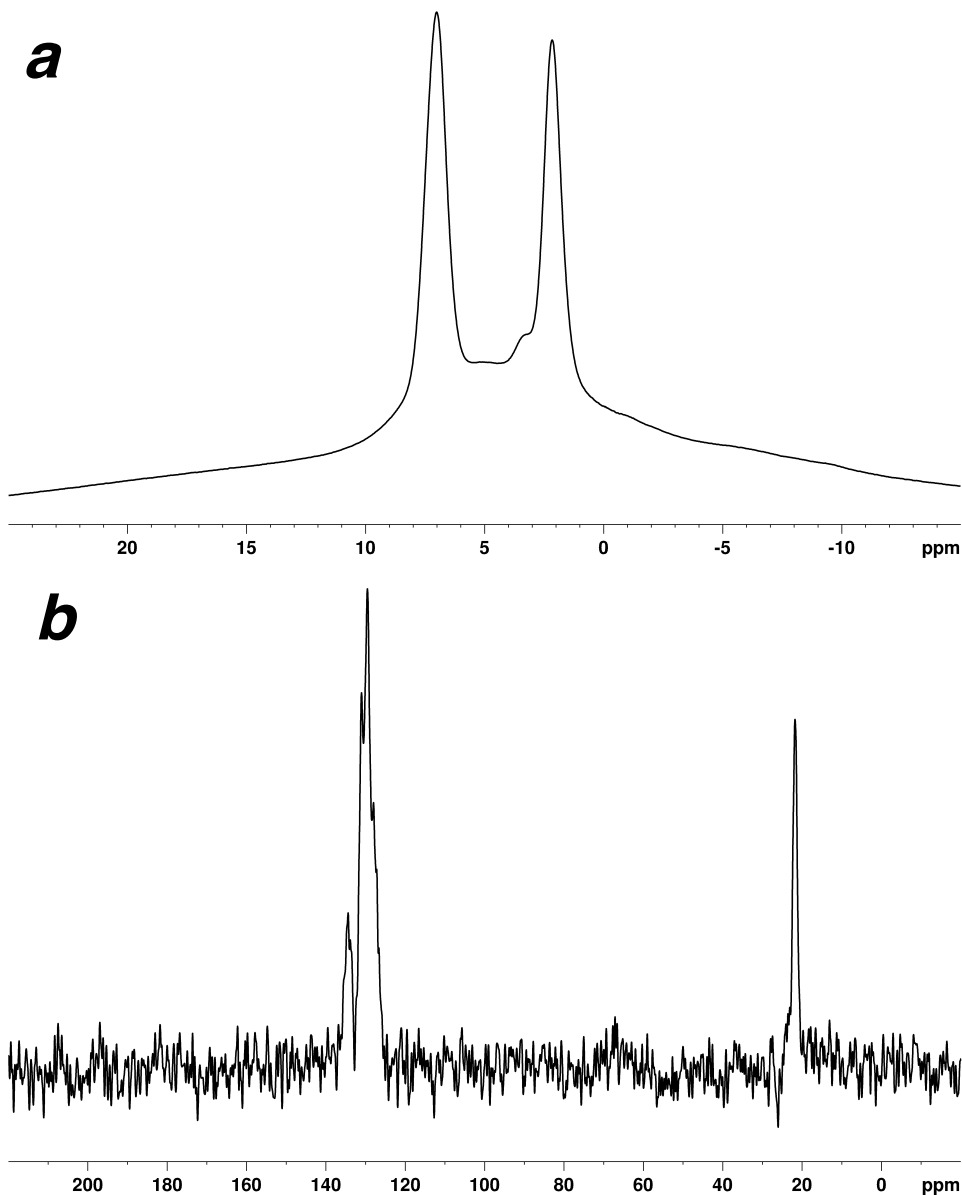

**Figure S91.** Solid-state NMR spectra of deuterated *p*-thiocresol. (a)  $^1\text{H}$  MAS NMR spectrum and (b)  $^{13}\text{C}$  CP/MAS NMR spectrum. Deuteration of *p*-thiocresol was completed by dissolving the sample in methanol- $\text{d}_4$  (50 mg/mL) and then warming to 90 °C for 5 minutes or until the sample had completely dissolved. The sample was cooled to 50 °C and incubated for 12 hours. The sample was cooled to room temperature, where crystals readily formed. The crystals were filtered and dried, and then redissolved in methanol- $\text{d}_4$  (50 mg/mL). The process was repeated three times.

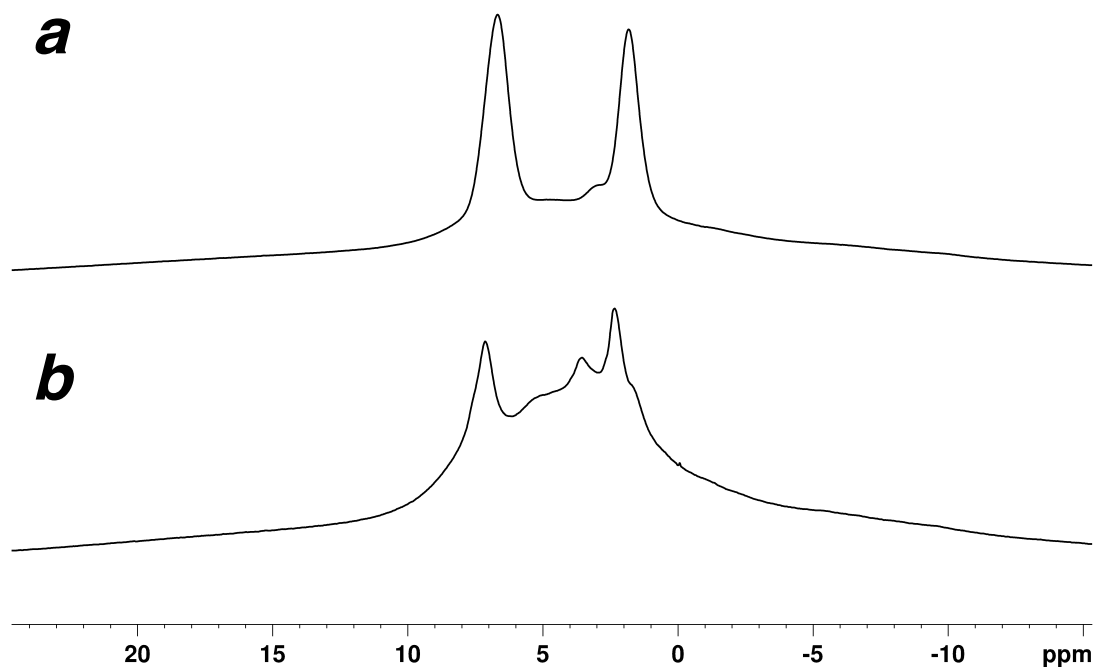

**Figure S92.** Comparison of solid-state MAS  $^1\text{H}$  NMR spectra of *p*-thiocresol as (a) deuterated *p*-thiocresol and (b) protonated *p*-thiocresol. Deuteration of *p*-thiocresol was completed by dissolving the sample in methanol- $\text{d}_4$  (50 mg/mL) and then warming to 90 °C for 5 minutes or until the sample had completely dissolved. The sample was cooled to 50 °C and incubated for 12 hours. The sample was cooled to room temperature, where crystals readily formed. The crystals were filtered and dried, and then redissolved in methanol- $\text{d}_4$  (50 mg/mL). The process was repeated three times. The peaks at 5.0 ppm and 3.2 ppm are present in the protonated sample but absent in the deuterated sample, indicating that both resonances are due to thiol protons, which are in different environments in the crystalline form.

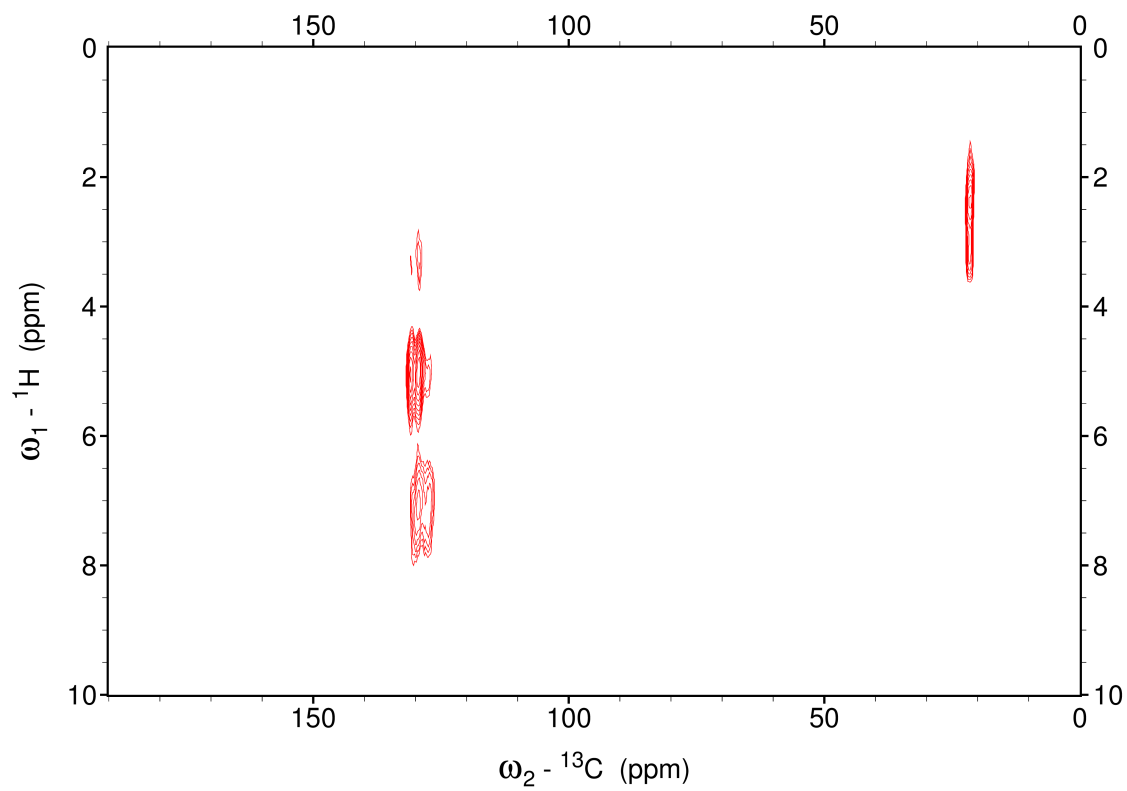

**Figure S93.** Solid-state  $^{13}\text{C}$ - $^1\text{H}$  HETCOR spectrum of *p*-thiocresol using a mixing time of 300  $\mu\text{sec}$ .

***ab initio* calculations on the crystal structure of Boc-L-4-thiophenylalanine *tert*-butyl ester (1) as a truncated dimer**

All calculations were performed using the Gaussian 09 program package.<sup>3</sup> To reduce calculation time, the crystal structure of **1** was truncated to remove atoms so that only the dimeric and monomeric *p*-thiocresol molecules remained (Figure S94). The structure was optimized at B3LYP level of theory with the 6-311+G(2d,p) basis set followed by frequency calculations to ensure that all structures were true minima. The natural bond orbital (NBO) analysis was performed using the NBO program available in the Gaussian 09 software at B3LYP and MP2 levels of theory using various basis sets for the experimental crystal structure of the molecule.<sup>4</sup> The atomic charges were computed using CHELPG (CHarges from Electrostatic Potentials using a Grid-based method) at both B3LYP and MP2 level of theories for both crystal structure and optimized structures.<sup>5</sup> GAUSSVIEW was utilized for graphics preparation for this study.<sup>3</sup>

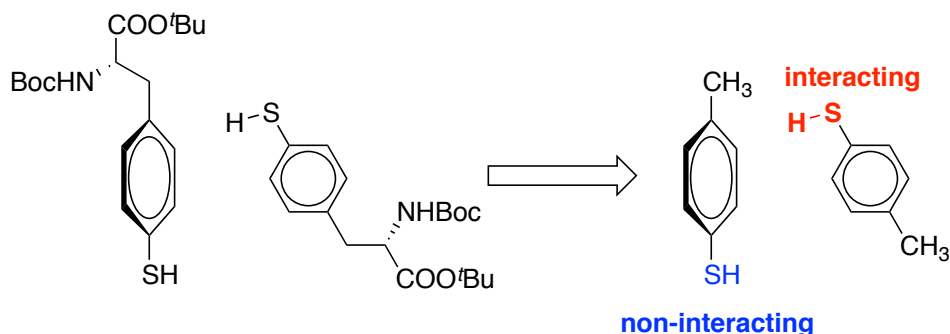

**Figure S94.** Based on the atomic coordinates from the orthorhombic crystals of **1** (left), a *p*-thiocresol dimer was generated for calculations (right). The two thiol groups are either “interacting” or “non-interacting” with respect to the aromatic ring, as indicated. Calculations were completed on the crystallographically observed S–H bond length of 1.26 Å and on the standardized S–H bond distance of 1.338 Å.<sup>7</sup>



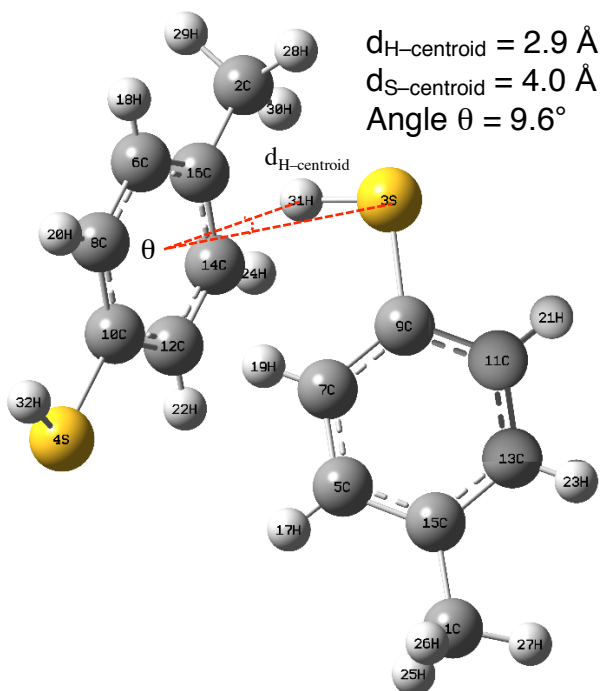

**Figure S95.** Structure of the *p*-thiocresol dimer, based on the atomic coordinates from the atomic orthorhombic crystals of **1**. Atom numbers are indicated.

The energy and atomic charges for the *p*-thiocresol dimer were examined based on atomic coordinates obtained from the crystal structure of **1** (Figure S95). The geometrical parameters  $d_{\text{S-centroid}}$ ,  $d_{\text{H-centroid}}$  (the distances between the thiol sulfur or hydrogen atom and the aromatic centroid of phenyl ring of the interacting subunit, respectively), and the angle  $\theta$  (defined as the angle S-centroid-H) are shown in Figure S95. The analyses of atomic charges at both B3LYP and MP2 levels of theories using 6-311+G(2d,p) and aug-cc-pvdz basis sets are shown in Table S17. To assess the electrostatic component of the S-H/ $\pi$  interaction, the atomic charges of the *p*-thiocresol monomer were computed using these same basis sets, and the deviation of atomic charges ( $\Delta q$ ) from the monomeric structure of *p*-thiocresol for sulfur and hydrogen atoms of two  $\sigma_{\text{S-H}}$  bonds are tabulated in the Table S18. These data indicate that the  $\sigma_{\text{S-H}}$  bond is polarized through intermolecular interaction with the aromatic ring. Polarization of the thiol bond is also expected to influence the Columbic electrostatic interaction energy between  $\sigma_{\text{S-H}}$  bond and aromatic ring, and these data are included in Table S18. The electrostatic energy between the  $\sigma_{\text{S-H}}$  bond and aromatic ring provides an important insight for the interaction between them.

**Table S17.** Calculated atomic charges of the *p*-thiocresol dimer based on crystallographic coordinates of **1** at B3LYP and MP2 levels of theories using 6-311+G(2d,p) and aug-cc-pvdz basis sets, obtained from the CHELPG method. Atoms are numbered according to the legend below: (a) carbon and (b) hydrogen. The thiol groups are highlighted in yellow, where atoms <sup>a</sup>31 (H) and <sup>a</sup>3 (S) represent the thiol interacting with the aromatic ring, and atoms 32 (H) and 4 (S) represent the thiol that is not interacting with the aromatic ring.

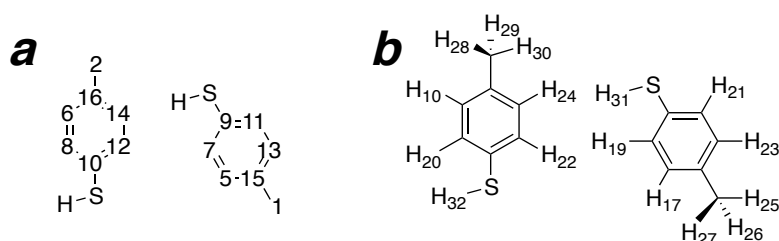

| S.NO            | Atom # | B3LYP          |               | MP2            |               |
|-----------------|--------|----------------|---------------|----------------|---------------|
|                 |        | 6-311+G (2d,p) | aug-cc-vdz    | 6-311+G (2d,p) | aug-cc-pvdz   |
| 1               | C      | -0.213         | -0.191        | -0.204         | -0.228        |
| 2               | C      | -0.339         | -0.310        | -0.323         | -0.356        |
| <sup>a</sup> 3  | S      | <b>-0.344</b>  | <b>-0.348</b> | <b>-0.345</b>  | <b>-0.345</b> |
| 4               | S      | <b>-0.287</b>  | <b>-0.289</b> | <b>-0.291</b>  | <b>-0.290</b> |
| 5               | C      | -0.218         | -0.207        | -0.215         | -0.222        |
| 6               | C      | -0.226         | -0.218        | -0.217         | -0.228        |
| 7               | C      | -0.119         | -0.106        | -0.105         | -0.120        |
| 8               | C      | -0.108         | -0.098        | -0.099         | -0.110        |
| 9               | C      | 0.094          | 0.093         | 0.079          | 0.087         |
| 10              | C      | 0.072          | 0.076         | 0.065          | 0.068         |
| 11              | C      | -0.077         | -0.065        | -0.063         | -0.075        |
| 12              | C      | -0.011         | -0.004        | -0.002         | -0.010        |
| 13              | C      | -0.303         | -0.286        | -0.298         | -0.309        |
| 14              | C      | -0.359         | -0.341        | -0.356         | -0.367        |
| 15              | C      | 0.254          | 0.242         | 0.246          | 0.257         |
| 16              | C      | 0.327          | 0.315         | 0.315          | 0.329         |
| 17              | H      | 0.121          | 0.115         | 0.121          | 0.126         |
| 18              | H      | 0.139          | 0.133         | 0.138          | 0.143         |
| 19              | H      | 0.095          | 0.087         | 0.087          | 0.095         |
| 20              | H      | 0.083          | 0.077         | 0.080          | 0.084         |
| 21              | H      | 0.151          | 0.141         | 0.147          | 0.153         |
| 22              | H      | 0.131          | 0.122         | 0.126          | 0.132         |
| 23              | H      | 0.141          | 0.129         | 0.138          | 0.145         |
| 24              | H      | 0.154          | 0.143         | 0.153          | 0.160         |
| 25              | H      | 0.051          | 0.044         | 0.048          | 0.055         |
| 26              | H      | 0.054          | 0.048         | 0.053          | 0.059         |
| 27              | H      | 0.059          | 0.054         | 0.058          | 0.064         |
| 28              | H      | 0.106          | 0.098         | 0.102          | 0.111         |
| 29              | H      | 0.071          | 0.062         | 0.066          | 0.076         |
| 30              | H      | 0.090          | 0.083         | 0.088          | 0.096         |
| <sup>a</sup> 31 | H      | <b>0.209</b>   | <b>0.206</b>  | <b>0.206</b>   | <b>0.213</b>  |
| 32              | H      | <b>0.202</b>   | <b>0.196</b>  | <b>0.203</b>   | <b>0.209</b>  |

<sup>a</sup>indicates the thiol group which is interacting with the aromatic ring.

**Table S18.** Summary of the electronic polarization, associated electrostatic interaction, and NBO analyses for the S–H/ $\pi$  interaction of the *p*-thiocresol dimer based on the atomic coordinates from the crystal structure of **1** at B3LYP and MP2 levels of theories using 6-311+G(2d,p) and aug-cc-pvdz basis sets.

| S.NO                                         |                  | B3LYP          |             | MP2            |             |
|----------------------------------------------|------------------|----------------|-------------|----------------|-------------|
|                                              |                  | 6-311+G (2d,p) | aug-cc-pvdz | 6-311+G (2d,p) | aug-cc-pvdz |
| $\Delta q$ (e)                               | <sup>a</sup> S   | 0.0656         | 0.0715      | 0.0598         | 0.0640      |
|                                              | <sup>a</sup> H   | -0.0211        | -0.0263     | -0.0094        | -0.0254     |
|                                              | S                | 0.0083         | 0.0127      | 0.0053         | 0.0095      |
|                                              | H                | -0.0140        | -0.0165     | 0.0061         | -0.0215     |
| $\Delta\Delta q$ S (e)                       |                  | -0.057         | -0.059      | -0.054         | -0.055      |
| $\Delta\Delta q$ H (e)                       |                  | 0.007          | 0.010       | 0.003          | 0.004       |
| $\Delta E_{el}$ (kcal/mol)                   |                  | -0.866         | -0.745      | -1.07          | -0.72       |
| $E_{i \rightarrow j}^{(2)*}$ (kcal/mol)      |                  | 0.70(0.75)     | 1.19 (1.26) | 0.76 (0.80)    | 1.45 (1.52) |
| $\langle \pi_{Aro}   \sigma_{S-H}^* \rangle$ |                  | 0.1048         | 0.1261      | 0.1070         | 0.1064      |
| $\alpha$                                     | $\sigma_{S-H}^*$ | 0.0075         | 0.0079      | 0.00524        | 0.0056      |
|                                              | $\pi_{Aro}$      | 1.690          | 1.691       | 1.685          | 1.685       |

<sup>a</sup>indicates the thiol group which is interacting with the aromatic ring.

$\Delta q$  is the deviation of atomic charges from the *p*-thiocresol monomer and the calculated atomic charges from the crystal structure of **1**.

$\Delta\Delta q$  is the difference of atomic charges between the “interacting” and “non-interacting” thiol groups

$E_{el}$  is the energy due to the electrostatic interaction

$E_{i \rightarrow j}^{(2)*}$  is the interaction energy between donor NBO ( $\sigma_j^*$ ) and acceptor NBO ( $\sigma_i$ ).

$\langle \pi_{Aro} | \sigma_{S-H}^* \rangle$  is the energy between the orbitals  $\pi_{Aro}$  and  $\sigma_{S-H}^*$

$\alpha$  is electron occupancy for the indicated orbitals

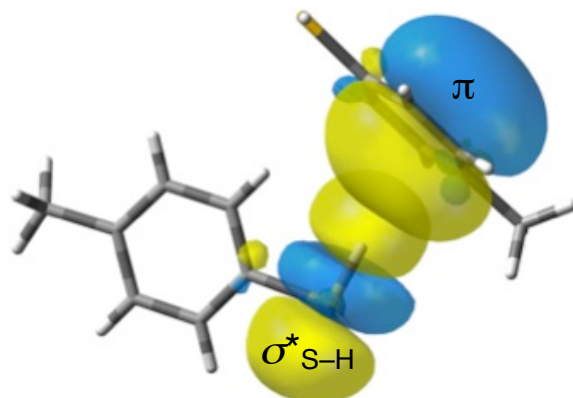

**Figure S96.** Orbital overlap between the  $\pi$  orbital of the aromatic ring and the antibonding  $\sigma^*_{\text{S-H}}$  orbital of the S–H bond. NBO analysis indicates favorable overlap between these orbitals.

To examine the  $\sigma^*_{\text{S-H}}$ /aromatic interaction in greater detail, we performed NBO analysis for the two structures at B3LYP and MP2 levels of theory using 6-311+G(2d,p) and aug-cc-pvdz basis sets. NBO analysis can be applied to quantitatively determine the strength of the  $\sigma^*_{\text{S-H}}$ /aromatic interaction present in this S–H/ $\pi$  interaction. This interaction might be viewed as a Lewis interaction, where the occupied  $\pi$  orbital of aromatic ring behaves as a Lewis acid-Lewis base, transferring electron density to the empty  $\sigma^*_{\text{S-H}}$ , which acts as a Lewis acid. The magnitude of the interaction energy,  $E_{i \rightarrow j}^{(2)}$ , between a donor NBO,  $\sigma_j^*$ , and an acceptor NBO,  $\sigma_i$ , can be estimated using the second order perturbation theory:

$$E_{i \rightarrow j}^{(2)} = q_i \frac{|\langle \sigma_j^* | \hat{F} | \sigma_i \rangle|^2}{\varepsilon_j^* - \varepsilon_i}$$

where  $i$  and  $j$  denote the donor and acceptor orbitals,  $q_i$  is the occupancy of bonding orbital,  $\varepsilon_i$  and  $\varepsilon_j^*$  correspond to their respective orbital energies, and  $\hat{F}$  is the Fock operator respectively. The data indicate that the primary interaction is between the unoccupied  $\sigma^*_{\text{S-H}}$  and one of the occupied  $\pi$  orbitals of the aromatic ring. The values of occupancy,  $\alpha$ , of these respective orbitals are included Table S18. The extent of overlap between these respective orbitals is shown in Figure S96, as obtained from NBO calculation on the experimental structure **1** at MP2 level of theory using the aug-cc-pvdz basis set. The overlap between the  $\pi_{\text{Aro}}$  and  $\sigma^*_{\text{S-H}}$  NBOs was quantified by calculating the overlap integral between them,  $\langle \pi_{\text{Aro}} | \sigma^*_{\text{S-H}} \rangle$ , at B3LYP and MP2 levels of theories using 6-311+G (2d,p) and aug-cc-pvdz basis sets; these data are included in Table S18. The overlap integral and the figure indicate that there is significant in-phase overlap between the  $\pi_{\text{Aro}}$  and  $\sigma^*_{\text{S-H}}$  NBOs. The possible pair of  $E_{i \rightarrow j}^{(2)}$  interaction energies for the  $\sigma^*_{\text{S-H}}$  orbital and all other orbitals as obtained from NBO calculation at B3LYP and MP2 levels of theory using 6-311+G (2d,p) and aug-cc-pvdz basis sets are presented in Table S18.

The data indicate that there is a significant  $\sigma^*_{\text{S-H}}-\pi_{\text{Aro}}$  interaction present in the crystal structure of **1**. Furthermore, to examine the interaction between  $\sigma^*_{\text{S-H}}$  and all other possible orbitals, we deleted all orbitals except for the  $\sigma^*_{\text{S-H}}$  and the  $\pi_{\text{Aro}}$  under interrogation and measured the energy of stabilization. The calculation was performed for both structures at B3LYP and MP2 levels of theory using 6-311+G (2d,p) and aug-cc-pvdz basis sets, and the associated stabilization energies are also included in Table S18. The data indicate that the interaction between the  $\sigma^*_{\text{S-H}}$  and the  $\pi$  orbitals stabilizes the overall system in a significant

manner. It is noteworthy that these calculations were conducted on the *p*-thiocresol dimer with an S–H bond length of 1.26 Å, as determined by X-ray crystallography. At the more likely S–H bond length of 1.34 Å, the extent of orbital overlap and energetic stabilization between the  $\sigma^*_{\text{S-H}}$  and the  $\pi$  orbitals would potentially be even greater.

Based on the described computational analysis, the S–H bond becomes more polarized on interaction with an aromatic ring, and there is a significant electrostatic interaction present between the  $\sigma^*_{\text{S-H}}$  bond and aromatic ring. The calculations at higher levels on both the experimental structures do not alter these findings. Through NBO analysis, it was revealed that there is significant in-phase overlap between the antibonding  $\sigma^*_{\text{S-H}}$  orbital and the  $\pi$  orbital of the aromatic ring. Therefore, we can conclude that the  $\sigma^*_{\text{S-H}}-\pi_{\text{Aro}}$  interaction is important for stability of this intermolecular, non-covalent interaction.

## Analysis of $\nu_{\text{S-H}}$ as a function of S–H bond length and interaction with the aromatic ring

The *p*-thiocresol dimer model was further examined by DFT calculations as a function of the length of the S–H bond, with all other atoms held at fixed positions. The S–H bond length was varied systematically within a dimer (interacting S–H) and monomer (non-interacting S–H) context to identify the effects of bond length and interaction with the aromatic ring on S–H stretching frequency. The initial experiments were conducted using the computationally inexpensive B3LYP method with the cc-pvtz basis set. After identification of the 1.360 Å bond length as generating frequencies most similar to the IR data, these structures were re-examined using the TPSSh method. These data, while not expected to quantitatively identify the bond length in solution, indicate that longer bond lengths are associated with lower S–H frequencies, and that interaction with the aromatic ring both decreases the frequency and increases the intensity of the absorbance at the S–H stretching frequency. These calculations also indicated a downfield change in the thiol H chemical shift with increasing S–H bond length.

**Table S19.** DFT calculations on the effect of S–H bond length and interaction with the aromatic ring on IR properties of the S–H bond.

| Thiol structure                            | S–H bond length, Å | S–H frequency, $\text{cm}^{-1}$ | Intensity   | method       | basis set      |
|--------------------------------------------|--------------------|---------------------------------|-------------|--------------|----------------|
| <i>monomer</i><br><i>(non-interacting)</i> | 1.261              | 3319                            | 0.95        | B3LYP        | cc-pvtz        |
|                                            | 1.338              | 2722                            | 0.21        | B3LYP        | cc-pvtz        |
|                                            | 1.350              | 2641                            |             | B3LYP        | cc-pvtz        |
|                                            | 1.360              | 2575                            | 1.5         | B3LYP        | cc-pvtz        |
|                                            | <b>1.360</b>       | <b>2584</b>                     | <b>2.1</b>  | <b>TPSSh</b> | <b>cc-pvtz</b> |
|                                            | 1.375              | 2477                            | 2.1         | B3LYP        | cc-pvtz        |
|                                            | 1.400              | 2311                            | 2.7         | B3LYP        | cc-pvtz        |
| <i>dimer</i><br><i>(interacting)</i>       | 1.261              | 3320                            | 19.1        | B3LYP        | cc-pvtz        |
|                                            | 1.338              | 2714                            | 29.5        | B3LYP        | cc-pvtz        |
|                                            | 1.350              | 2634                            | 31.8        | B3LYP        | cc-pvtz        |
|                                            | 1.360              | 2568                            | 33.8        | B3LYP        | cc-pvtz        |
|                                            | <b>1.360</b>       | <b>2568</b>                     | <b>37.2</b> | <b>TPSSh</b> | <b>cc-pvtz</b> |
|                                            | 1.375              | 2470                            | 37.2        | B3LYP        | cc-pvtz        |
|                                            | 1.400              | 2305                            | 43.6        | B3LYP        | cc-pvtz        |

## Cambridge Structural Database Search Parameters and Results

A search was conducted on the Cambridge Structural Database (version 5.36, released in November, 2014) for entries containing non-bonded contacts between thiols (motif Z–S–H, Z = any non-hydrogen atom) or cations ( $\text{Li}^+$ ,  $\text{Na}^+$ ,  $\text{K}^+$ ,  $\text{Rb}^+$ ,  $\text{Cs}^+$ , or  $\text{Ag}^+$ ) and a 6-membered phenyl ring containing only carbon. The release of the database used in the current study contained over 710,000 molecules. Searches were conducted using ConQuest (version 1.17 Cambridge Crystallographic Data Centre, 2014).

The initial search parameters placed restrictions on the distance between the aromatic-centroid and the interacting atom, either the thiol sulfur atom for thiol-aromatic interactions or  $\text{Li}^+$ ,  $\text{Na}^+$ ,  $\text{K}^+$ ,  $\text{Rb}^+$ ,  $\text{Cs}^+$ , or  $\text{Ag}^+$  (generalized as  $\text{M}^+$ ) for cation-aromatic interactions (Figure S97). Intermolecular and intramolecular contacts (2 bonds or more) were included within the search parameters. For the transition metal  $\text{Ag}^+$ , only intermolecular interactions were considered. Only error-free, non-disordered structures where  $R < 0.10$  were included in the search, and powder pattern structures were excluded. For cation-aromatic interactions, the range was defined as  $d_{\text{M}^+-\text{centroid}} \leq 4.2 \text{ \AA}$  (for cations  $\text{Li}^+$ ,  $\text{Na}^+$ , and  $\text{K}^+$ ) or  $d_{\text{M}^+-\text{centroid}} \leq 4.8 \text{ \AA}$  (for cations  $\text{Rb}^+$ ,  $\text{Cs}^+$ , and  $\text{Ag}^+$ ). For thiol-aromatic interactions, the range was defined as  $d_{\text{S}-\text{centroid}} \leq 4.8 \text{ \AA}$ . The interacting 6-membered aromatic ring contained only carbon atoms, and heteroaromatic rings were excluded from this study. For thiol-aromatic interactions, two lists were generated with different coordinates for hydrogen atom location: one with the coordinates as reported in the CSD, and one where the S–H bond length was normalized to  $1.338 \text{ \AA}$ .<sup>6</sup> For bond length normalization, the coordinates of the hydrogen atom were adjusted along the vector of the S–H bond directly using ConQuest 1.17, Cambridge Crystallographic Data Centre, 2014. Data and statistics obtained from the thiol structures with fixed S–H bond lengths are indicated as “normalized” entries.

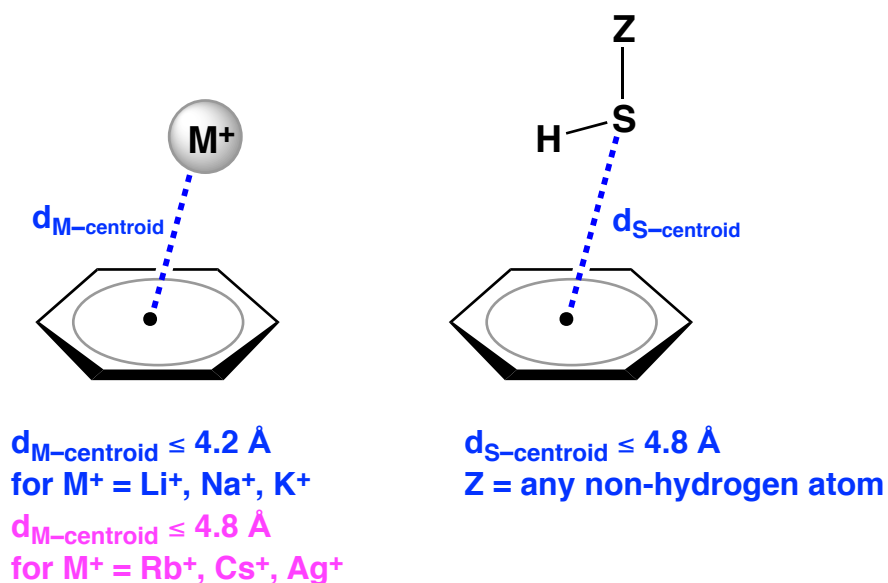

**Figure S97.** Initial search parameters for cation/ $\pi$  and S–H/ $\pi$  interactions in the Cambridge Structural Database. The interacting 6-membered aromatic ring only contained carbon atoms; heteroaromatic rings were excluded from this study. Cation/ $\pi$  aromatic interactions (left) and S–H/ $\pi$  aromatic interactions (right) were examined and compared in this study.

For all entries obtained from the initial search parameters, distances and bond angles were calculated. The measurements on the crystal structures included distances from the interacting atom ( $M^+$ , thiol S, or thiol H, generalized as “X”) to the aromatic ring. The measurements included:  $d_{X\text{-centroid}}$ , distance to the calculated centroid of the aromatic ring;  $d_{X\text{-Cmin}}$ , the shortest distance from X to any aromatic carbon atom; and  $d_{\text{plane}}$ , the normal distance from X to the plane of the aromatic ring (Figure S98). The radius ( $r$ ) was defined as the distance from the aromatic centroid to the projection of X in the plane of the aromatic ring, and was calculated

from measured distances as  $\sqrt{d_{X\text{-centroid}}^2 - d_{\text{plane}}^2}$ . For the thiol entries, measurements were also obtained for the bond length S–H (range 0.86 Å–1.42 Å), for the Z–S–H bond angle (range 80°–120°), and for the angle S–H–centroid. Thiol structures that had S–H bond lengths or Z–S–H bond angles outside of these criteria were excluded.

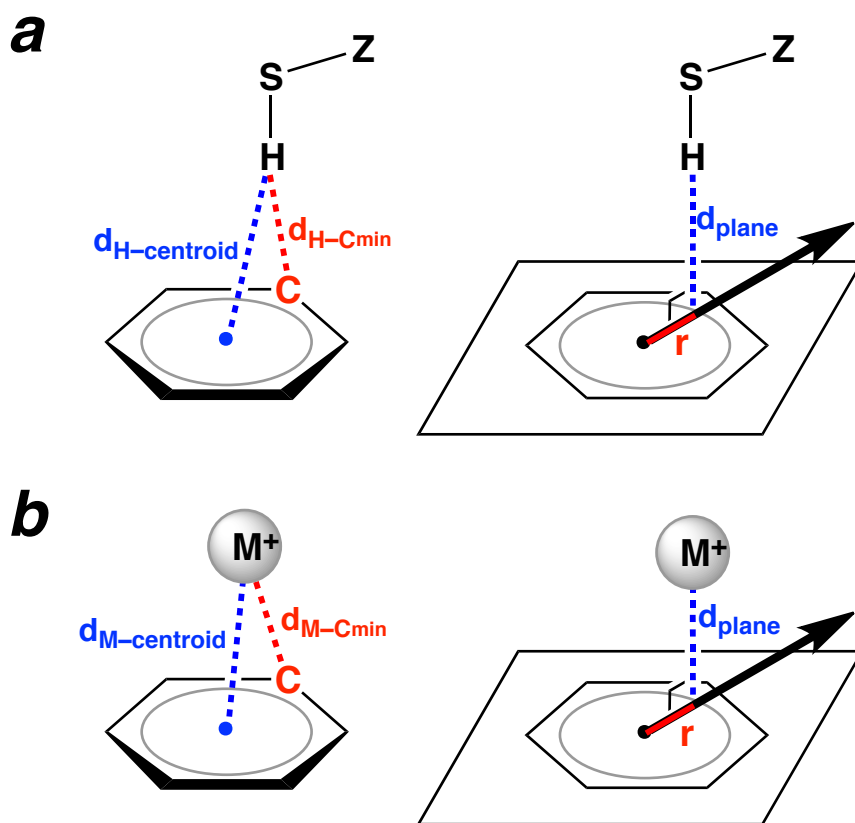

**Figure S98.** Defined distances accumulated from crystal structures within defined parameters for (a) S–H/ $\pi$  interactions and (b) cation– $\pi$  interactions. and  $d_{X\text{-centroid}}$  refers to the distance between the atom X (where X =  $M^+$ , S or H) and the centroid of the aromatic ring;  $d_{X\text{-Cmin}}$  refers to the distance between the atom X (where X =  $M^+$ , S or H) and the nearest carbon atom of the aromatic ring;  $d_{\text{plane}}$  refers to the distance between the atom X (where X =  $M^+$ , S or H) and the plane of the aromatic ring;  $r$  refers to the projected distance from atom  $M^+$ , S, or H within the plane of the aromatic ring to the centroid, which was calculated from measured distances as

$$\sqrt{d_{X\text{-centroid}}^2 - d_{\text{plane}}^2}.$$



In order to identify and study entries with close cation- or thiol-aromatic interactions, the accumulated entries from the CSD were constrained by a geometric “cylinder” based on the plane of the aromatic ring (Figure S99). Only entries with interacting atom coordinates within the defined cylinder were examined further. The base of the cylinder was defined by  $r \leq 3.00 \text{ \AA}$  for  $M^+$  and thiol hydrogens. The size of the base was designed to be slightly larger than twice the radius of benzene. For thiol sulfur atoms, the base of the cylinder was defined as  $r \leq 4.20 \text{ \AA}$ , which was twice the radius of benzene ( $3.00 \text{ \AA}$ ) and an additional  $1.20 \text{ \AA}$  to account for the S–H bond. The height of the cylinder was defined for each X as  $d_{\text{plane}} \leq (1.25 \times \Sigma \text{vdWr})$  for carbon and X, where  $\Sigma \text{vdWr}$  refers to the sum of van der Waals radii. The ionic radii for  $\text{Li}^+$ ,  $\text{Na}^+$ ,  $\text{K}^+$ ,  $\text{Rb}^+$ ,  $\text{Cs}^+$ , and  $\text{Ag}^+$  were defined as  $0.60 \text{ \AA}$ ,  $0.95 \text{ \AA}$ ,  $1.33 \text{ \AA}$ ,  $1.48 \text{ \AA}$ ,  $1.69 \text{ \AA}$ , and  $1.26 \text{ \AA}$  respectively;<sup>6</sup> the van der Waals radii for C, H, and S were defined as  $1.70 \text{ \AA}$ ,  $1.20 \text{ \AA}$ , and  $1.80 \text{ \AA}$  respectively.<sup>6, 7</sup> Using these definitions, the  $\Sigma \text{vdWr}$  for  $\text{C}\cdots\text{Li}^+$ ,  $\text{C}\cdots\text{Na}^+$ ,  $\text{C}\cdots\text{K}^+$ ,  $\text{C}\cdots\text{Rb}^+$ ,  $\text{C}\cdots\text{Cs}^+$ ,  $\text{C}\cdots\text{Ag}^+$ ,  $\text{C}\cdots\text{H}$ , and  $\text{C}\cdots\text{S}$  were defined as  $2.30 \text{ \AA}$ ,  $2.65 \text{ \AA}$ ,  $3.03 \text{ \AA}$ ,  $3.18 \text{ \AA}$ ,  $3.39 \text{ \AA}$ ,  $2.96 \text{ \AA}$ ,  $2.90 \text{ \AA}$ , and  $3.50 \text{ \AA}$  respectively.<sup>6, 7</sup> The cylinder restrictions and defined distances used for this study are shown in Figure S99.

After applying the cylinder restraints on the atomic coordinates of each cation, hydrogen, or sulfur atom, the individual structures were manually examined and annotated for features that could potentially affect the geometry of the cation- or thiol-aromatic interaction. The entries were manually annotated with the following criteria: (A) polycyclic rings; (A1) complex macrocyclic rings; (B) carbanions within or adjacent to the interacting aromatic rings; (C) in thiol structures, where thiol groups were “pointed away” from the plane of the aromatic ring (as defined by  $(d_{\text{S-plane}} - d_{\text{H-plane}}) \geq -0.10 \text{ \AA}$ ); (D) in thiol structures, where the sulfur atom is apparently tri-coordinate; (E) redundant structures or entries; (F) unusual structures; or (G) in cation structures, where the cation was interacting with a crown ether. The resultant number of structures after each level of parsing are shown in Table S20. The  $\text{Ag}^+$  database was not manually parsed.

The geometries of S–H/ $\pi$  interactions were further compared to O–H/ $\pi$  interactions, which were expected to have a greater electrostatic component, and potentially different geometries of interaction. A search of the CSD was conducted for entries containing intermolecular non-bonded contacts between alcohols (motif C–O–H) and a 6-membered phenyl ring containing only carbon atoms. Non-bonded contacts were initially identified as  $d_{\text{O-centroid}} \leq 4.8 \text{ \AA}$  (similar to the right panel, Figure S97). Only intermolecular contacts were included within the search parameters. Only error-free, non-disordered structures where  $R < 0.05$  were included in the search, and powder pattern structures were excluded. Distances were measured or calculated for selected entries as in Figure S98b, including  $d_{\text{X-Cmin}}$ ,  $d_{\text{plane}}$ , and  $r$ . Entries with O–H/ $\pi$  interactions were restricted to structures where the bond length O–H was between  $0.63 \text{ \AA}$ – $1.04 \text{ \AA}$ , and the bond angle C–O–H was between  $100^\circ$ – $140^\circ$ . Similar to the “cylinder” restriction on entries containing S–H/ $\pi$  interactions, the entries containing O–H/ $\pi$  interactions were restricted  $r \leq 3.00 \text{ \AA}$  and  $d_{\text{H-plane}} \leq 3.63 \text{ \AA}$ ; oxygen atoms were not restricted. Entries were manually parsed for criterion C (see above). Only divalent alcohol oxygen atoms were included in the original search parameters (criterion D was excluded using initial search restrictions). Only one O–H/ $\pi$  interaction was considered for each structure identified in the CSD; for structures containing multiple O–H/ $\pi$  interactions, only the interaction with the shortest  $d_{\text{H-Cmin}}$  was considered in analyses.

A large number of entries were found in the CSD for alcohol groups located near a 6-membered aromatic ring. However, many of these structures may potentially have competing interactions with conventional hydrogen bonding groups (such as oxygen atoms or nitrogen atoms that can interact as O–H··O or O–H··N, respectively). In order to exclude competing interactions and identify only O–H/ $\pi$  interactions, entries identified with oxygen, nitrogen, or metal atoms within 2.50 Å of the alcohol hydrogen were excluded (determined via ConQuest). It was discovered that 84% of the entries contained a proximal atom that could potentially compete with the O–H/ $\pi$  interactions.

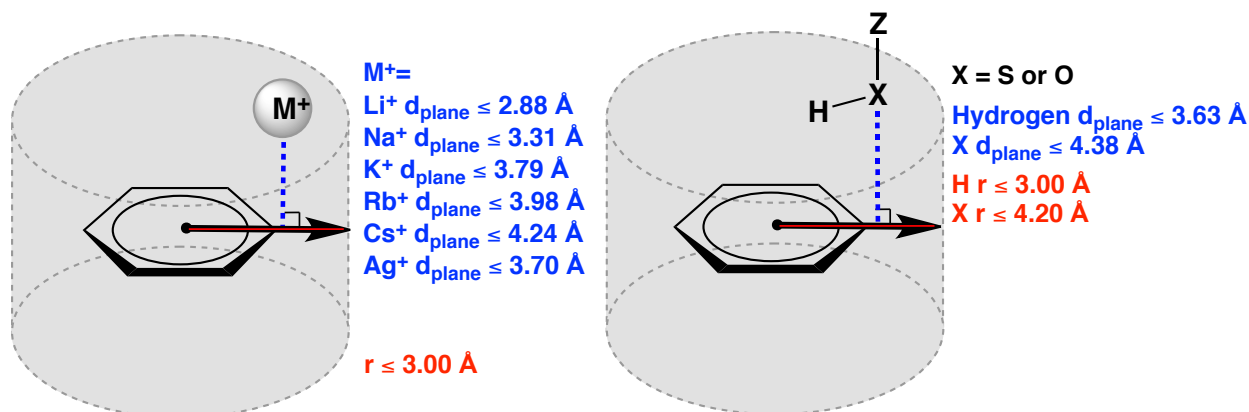

**Figure S99.** Identifying crystal structures obtained from the CSD with closely interacting cation/ $\pi$  or S–H/ $\pi$  aromatic interactions. A region of interaction was defined as a geometric cylinder for cations (left) and thiols (right) based on the plane of the aromatic ring. The cylinder restraints were established in order to identify potentially interacting groups, and to exclude non-interacting cations and thiols. The geometric restraints on the radius and distance  $d_{\text{plane}}$  are shown in the figure for cations (left) and thiols (right). The restrictions on the distance  $d_{\text{plane}}$  were defined as  $1.25 \times \Sigma(\text{van der Waals radius of carbon and ionic radius for respective cations})$  for cations or  $1.25 \times \Sigma(\text{van der Waals radii for carbon and hydrogen, sulfur, or oxygen})$  for thiols. The restriction on the distance  $r$  was set to twice the distance from the centroid to the edge of the aromatic ring (for sulfur and oxygen, an additional 1.20 Å were added to accommodate the S–H or O–H bond). Atomic coordinates that were located outside of the defined “cylinder” were excluded from this study.

**Table S20.** Summary of accumulated structures and entries in CSD database study, and the numbers of entries and structures remaining after each level of restriction. For thiol structures and entries, data were accumulated for the reported S-H bond and for normalizing all S-H bonds to be 1.338 Å (noted as “normalized” in the table). These entries were restricted based on a geometric “cylinder” that was defined based on the aromatic ring, and entries were retained for further study where the atom of interest (Li<sup>+</sup>, Na<sup>+</sup>, K<sup>+</sup>, Rb<sup>+</sup>, Cs<sup>+</sup>, Ag<sup>+</sup>, thiol H, or thiol S) was within the defined “cylinder.” These entries were then manually examined and annotated with specific criteria (described above), and the “manual parsing” excludes entries fitting criteria A, B, C, D, E, and F (criteria A1 and G were included). In the O-H/ $\pi$  database manual parsing, duplicates and trivalent oxygen atoms were removed in the initial searches (criteria D and E) and only criterion C was removed manually (criteria A, A1, and G were included). The Ag<sup>+</sup> database was not manually parsed.

For the O-H/ $\pi$  interactions, an additional search was conducted to identify structures where a nitrogen, oxygen, or metal atom was found within 2.50 Å of the alcohol hydrogen atom (“nearby classical hydrogen bond acceptor”).

|                                                                    | Initial Search |         | Cylinder Restriction |         | Manual Parsing |         |
|--------------------------------------------------------------------|----------------|---------|----------------------|---------|----------------|---------|
|                                                                    | Structures     | Entries | Structures           | Entries | Structures     | Entries |
| Li <sup>+</sup>                                                    | 82             | 198     | 37                   | 87      | 19             | 43      |
| Na <sup>+</sup>                                                    | 99             | 153     | 62                   | 105     | 48             | 79      |
| K <sup>+</sup>                                                     | 225            | 432     | 217                  | 404     | 193            | 362     |
| Rb <sup>+</sup>                                                    | 33             | 135     | 18                   | 72      | 10             | 25      |
| Cs <sup>+</sup>                                                    | 88             | 227     | 60                   | 156     | 60             | 127     |
| Ag <sup>+</sup>                                                    | 681            | 1120    | 437                  | 664     |                |         |
| X-SH<br>H reference                                                | 186            | 490     | 110                  | 182     | 78             | 127     |
| X-SH<br>S reference                                                | 186            | 490     | 163                  | 398     | 102            | 202     |
| X-SH, normalized,<br>H reference                                   | 186            | 490     | 111                  | 178     | 79             | 122     |
| X-SH, normalized,<br>S reference                                   | 186            | 490     | 169                  | 409     | 89             | 210     |
| C-OH, all structures<br>H reference                                | 6743           | 11886   | 1725                 |         | 1514           |         |
| C-OH, nearby<br>classical hydrogen<br>bond acceptor<br>H reference | 722            | 1176    | 290                  |         | 270            |         |

**Table S21.** Summary of comparisons between cation/ $\pi$  and S–H/ $\pi$  aromatic interactions in the CSD database study. Quantities of occurrences are shown where the  $d_{X-C_{min}}$  and  $d_{X-centroid}$  distances were less than the  $\Sigma vdW$ r for carbon and X, or where  $d_{X-C_{min}} < d_{X-centroid}$  (X = Li<sup>+</sup>, Na<sup>+</sup>, K<sup>+</sup>, Rb<sup>+</sup>, Cs<sup>+</sup>, Ag<sup>+</sup>, thiol S or thiol H). The relative percentage for each represented category is shown in parentheses. Quantities and statistics are shown after each level of parsing, where “cylinder restriction” indicates all structures where atom X was within a defined region of interaction (see description above, Figure S99), and where “manual parsing” indicates only structures that did not have unusual or potentially altered geometry due to external coordinating groups (see page S97). “H reference” and “S reference” refer to thiol structures where the hydrogen atom or sulfur atom was used for cylinder restrictions. “Normalized” refers to thiol structures where the S–H bond length was normalized to 1.338 Å, using ConQuest 1.17.

|                                   |                               | Cylinder Restriction |           | Manual Parsing |           |
|-----------------------------------|-------------------------------|----------------------|-----------|----------------|-----------|
|                                   |                               | Structures           | Entries   | Structures     | Entries   |
| $d_{C_{min}} < \Sigma vdW$ radii  | Li <sup>+</sup>               | 14 (38%)             | 25 (29%)  | 7 (37%)        | 17 (40%)  |
|                                   | Na <sup>+</sup>               | 5 (8%)               | 7 (7%)    | 4 (8%)         | 5 (6%)    |
|                                   | K <sup>+</sup>                | 21 (10%)             | 35 (9%)   | 19 (10%)       | 32 (9%)   |
|                                   | Rb <sup>+</sup>               | 4 (22%)              | 18 (25%)  | 2 (20%)        | 2 (8%)    |
|                                   | Cs <sup>+</sup>               | 9 (15%)              | 25 (16%)  | 8 (13%)        | 16 (13%)  |
|                                   | Ag <sup>+</sup>               | 47 (11%)             | 66 (10%)  |                |           |
|                                   | X-SH H reference              | 58 (53%)             | 81 (45%)  | 45 (58%)       | 62 (49%)  |
|                                   | X-SH S reference              | 64 (39%)             | 89 (22%)  | 47 (46%)       | 65 (32%)  |
|                                   | X-SH, normalized, H reference | 66 (59%)             | 98 (55%)  | 47 (60%)       | 71 (58%)  |
| X-SH, normalized, S reference     | 72 (43%)                      | 106 (26%)            | 46 (52%)  | 62 (30%)       |           |
| $d_{centroid} < \Sigma vdW$ radii | Li <sup>+</sup>               | 8 (22%)              | 14 (16%)  | 2 (11%)        | 3 (7%)    |
|                                   | Na <sup>+</sup>               | 7 (11%)              | 11 (10%)  | 5 (10%)        | 7 (9%)    |
|                                   | K <sup>+</sup>                | 43 (20%)             | 92 (22%)  | 38 (20%)       | 84 (23%)  |
|                                   | Rb <sup>+</sup>               | 5 (28%)              | 20 (28%)  | 2 (20%)        | 6 (24%)   |
|                                   | Cs <sup>+</sup>               | 14 (23%)             | 26 (21%)  | 12 (20%)       | 18 (14%)  |
|                                   | Ag <sup>+</sup>               | 5 (1%)               | 5 (8%)    |                |           |
|                                   | X-SH H reference              | 18 (16%)             | 28 (15%)  | 18 (23%)       | 27 (21%)  |
|                                   | X-SH S reference              | 18 (11%)             | 28 (7%)   | 18 (18%)       | 27 (13%)  |
|                                   | X-SH, normalized, H reference | 24 (22%)             | 35 (20%)  | 24 (29%)       | 35 (20%)  |
| X-SH, normalized, S reference     | 24 (14%)                      | 35 (9%)              | 18 (20%)  | 23 (11%)       |           |
| $d_{C_{min}} < d_{centroid}$      | Li <sup>+</sup>               | 28 (76%)             | 72 (83%)  | 17 (89%)       | 40 (93%)  |
|                                   | Na <sup>+</sup>               | 48 (77%)             | 79 (75%)  | 36 (75%)       | 61 (77%)  |
|                                   | K <sup>+</sup>                | 124 (57%)            | 227 (56%) | 110 (57%)      | 201 (56%) |
|                                   | Rb <sup>+</sup>               | 8 (44%)              | 44 (61%)  | 4 (40%)        | 10 (40%)  |
|                                   | Cs <sup>+</sup>               | 43 (72%)             | 101 (65%) | 37 (62%)       | 82 (65%)  |
|                                   | Ag <sup>+</sup>               | 432 (99%)            | 649 (98%) |                |           |
|                                   | X-SH H reference              | 99 (90%)             | 164 (90%) | 68 (87%)       | 111 (87%) |
|                                   | X-SH S reference              | 152 (93%)            | 378 (95%) | 92 (90%)       | 186 (92%) |
|                                   | X-SH, normalized, H reference | 98 (88%)             | 158 (89%) | 66 (85%)       | 106 (87%) |
| X-SH, normalized, S reference     | 155 (92%)                     | 386 (94%)            | 81 (91%)  | 199 (95%)      |           |

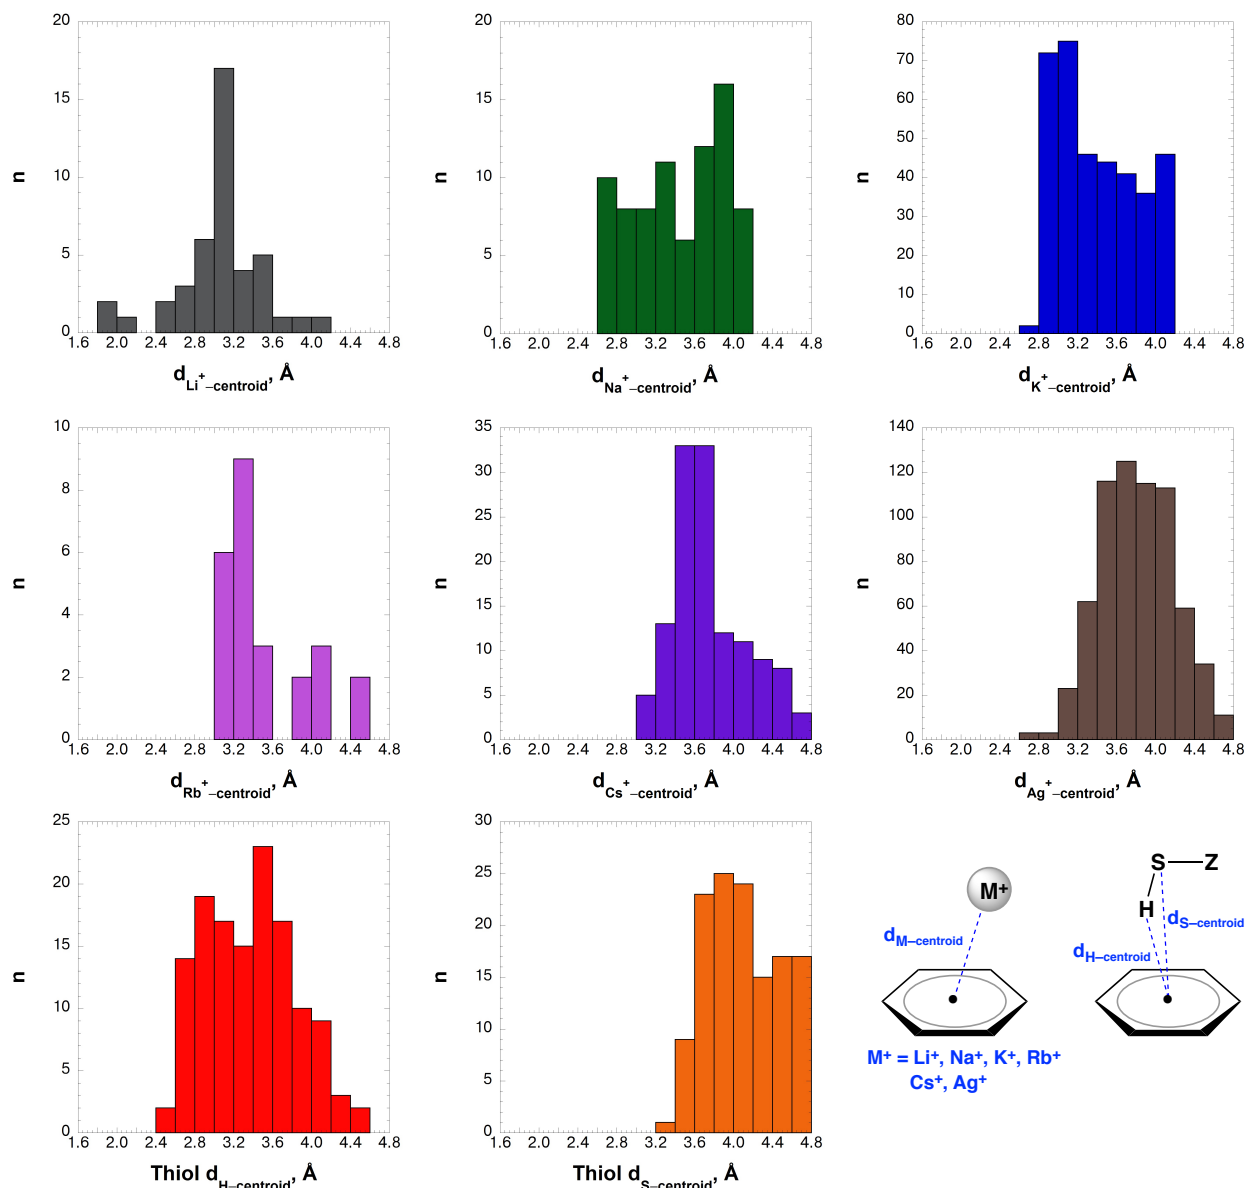

**Figure S100.** Distributions of the distance  $d_{X-\text{centroid}}$ , where  $X = \text{Li}^+, \text{Na}^+, \text{K}^+, \text{Rb}^+, \text{Cs}^+, \text{Ag}^+$ , thiol H, and thiol S. Histograms of the frequency of given distances from the aromatic centroid to the interacting atom X ( $X = \text{Li}^+, \text{Na}^+, \text{K}^+, \text{Rb}^+, \text{Cs}^+, \text{Ag}^+$ , thiol S, or thiol H). Measurements represented here include the atoms identified to be near to the aromatic ring, restricted by a “cylinder” with respect to the aromatic ring ( $\text{Li}^+ d_{\text{plane}} \leq 2.88 \text{ \AA}$ ,  $\text{Li}^+ r \leq 3.00 \text{ \AA}$ ;  $\text{Na}^+ d_{\text{plane}} \leq 3.31 \text{ \AA}$ ,  $\text{Na}^+ r \leq 3.00 \text{ \AA}$ ;  $\text{K}^+ d_{\text{plane}} \leq 3.79 \text{ \AA}$ ,  $\text{K}^+ r \leq 3.00 \text{ \AA}$ ;  $\text{Rb}^+ d_{\text{plane}} \leq 3.98 \text{ \AA}$ ,  $\text{Rb}^+ r \leq 3.00 \text{ \AA}$ ;  $\text{Cs}^+ d_{\text{plane}} \leq 4.24 \text{ \AA}$ ,  $\text{Cs}^+ r \leq 3.00 \text{ \AA}$ ;  $\text{Ag}^+ d_{\text{plane}} \leq 3.70 \text{ \AA}$ ,  $\text{Ag}^+ r \leq 3.00 \text{ \AA}$ ). Thiol hydrogen atoms are as reported in the CSD using the thiol hydrogen atom for reference in the cylinder restriction (Thiol H  $d_{\text{plane}} \leq 3.63 \text{ \AA}$ , Thiol H  $r \leq 3.00 \text{ \AA}$ ), and no restrictions were placed on the thiol atoms. Represented data are within the criteria described above (excludes A, B, C, D, E, and F criteria), except for the  $\text{Ag}^+$  database which was not manually parsed.

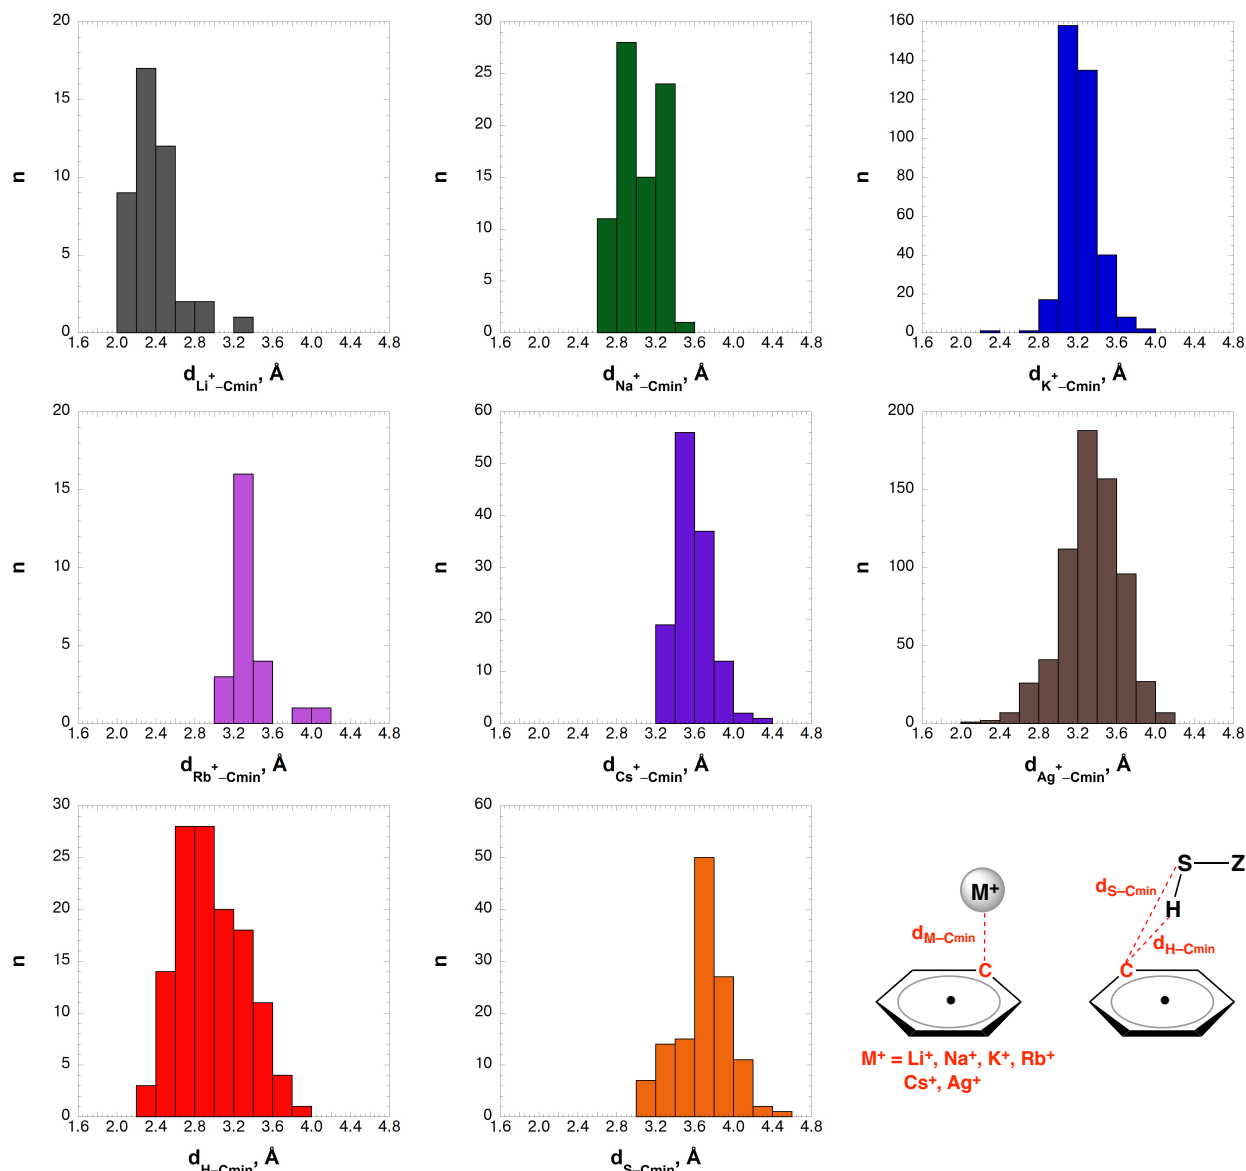

**Figure S101.** Distributions of the distance  $d_{X-Cmin}$ , where  $X = Li^+, Na^+, K^+, Rb^+, Cs^+, Ag^+$ , thiol H, and thiol S. Histograms of the frequency of given distances from the interacting atom X ( $X = Li^+, Na^+, K^+, Rb^+, Cs^+, Ag^+$ , thiol S, or thiol H) to the nearest aromatic ring carbon. Measurements represented here include the atoms identified to be near to the aromatic ring, restricted by a “cylinder” with respect to the aromatic ring ( $Li^+ d_{plane} \leq 2.88 \text{ \AA}$ ,  $Li^+ r \leq 3.00 \text{ \AA}$ ;  $Na^+ d_{plane} \leq 3.31 \text{ \AA}$ ,  $Na^+ r \leq 3.00 \text{ \AA}$ ;  $K^+ d_{plane} \leq 3.79 \text{ \AA}$ ,  $K^+ r \leq 3.00 \text{ \AA}$ ;  $Rb^+ d_{plane} \leq 3.98 \text{ \AA}$ ,  $Rb^+ r \leq 3.00 \text{ \AA}$ ;  $Cs^+ d_{plane} \leq 4.24 \text{ \AA}$ ,  $Cs^+ r \leq 3.00 \text{ \AA}$ ;  $Ag^+ d_{plane} \leq 3.70 \text{ \AA}$ ,  $Ag^+ r \leq 3.00 \text{ \AA}$ ). Thiol hydrogen atoms are as reported in the CSD using the thiol hydrogen atom for reference in the cylinder restriction (Thiol H  $d_{plane} \leq 3.63 \text{ \AA}$ , Thiol H  $r \leq 3.00 \text{ \AA}$ ), and no restrictions were placed on the thiol atoms. Represented data are within the criteria described above (excludes A, B, C, D, E, and F criteria), except for the  $Ag^+$  database which was not manually parsed.

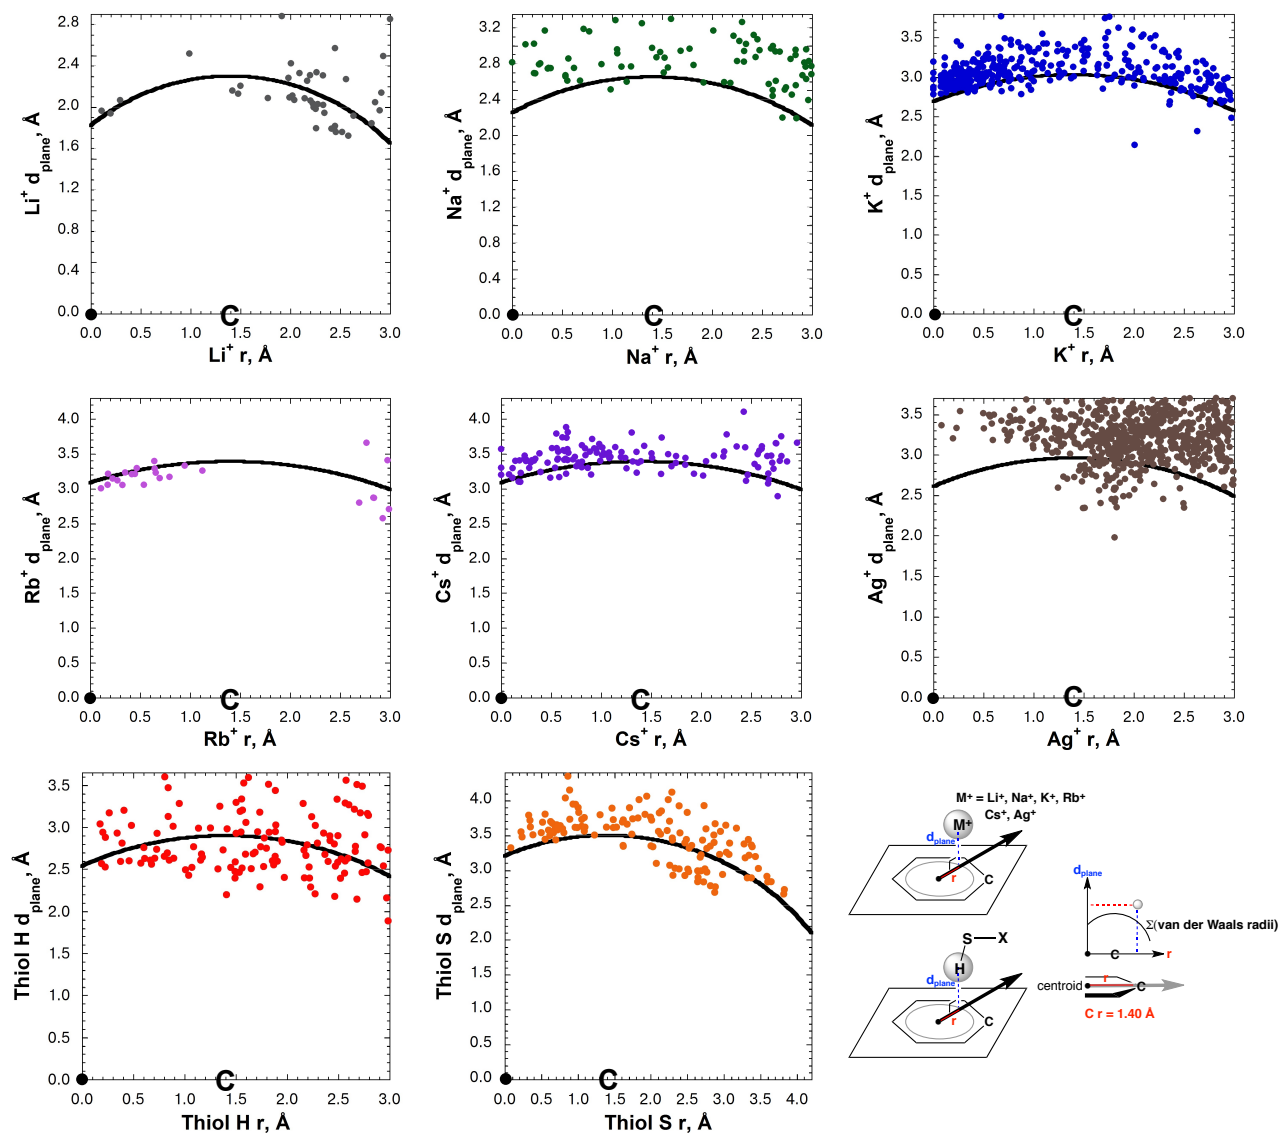

**Figure S102.** Localization of interacting atoms  $\text{Li}^+$ ,  $\text{Na}^+$ ,  $\text{K}^+$ ,  $\text{Rb}^+$ ,  $\text{Cs}^+$ ,  $\text{Ag}^+$ , thiol H, and thiol S atoms with respect to the plane of the aromatic ring. The atomic coordinates of the interacting atom, X, are indicated with reference to the plane of the aromatic ring for cation/ $\pi$  and S-H/ $\pi$  aromatic interactions. The distance  $d_{\text{X-plane}}$  is correlated against the distance X r (radius), where X =  $\text{Li}^+$ ,  $\text{Na}^+$ ,  $\text{K}^+$ ,  $\text{Rb}^+$ ,  $\text{Cs}^+$ ,  $\text{Ag}^+$ , thiol H, or thiol S. The X-axis represents the plane of the aromatic ring, and the origin represents the aromatic centroid. The origin (●) and edge (C) of the aromatic ring are indicated within the charts, where C is located at 1.40 Å from the origin. The black line indicates the sum of the van der Waals radii for carbon and the respective atoms or ions, where entries below the line are less than the sum of the van der Waals radii ( $\Sigma$  van der Waals radii for C and:  $\text{Li}^+ = 2.30 \text{ \AA}$ ;  $\text{Na}^+ = 2.65 \text{ \AA}$ ;  $\text{K}^+ = 3.03 \text{ \AA}$ ;  $\text{Rb}^+ = 3.18 \text{ \AA}$ ;  $\text{Cs}^+ = 3.39 \text{ \AA}$ ;  $\text{Ag}^+ = 2.96 \text{ \AA}$ ; thiol H = 2.90 Å; thiol S = 3.50 Å). Thiol hydrogen atoms are as reported in the CSD, and the thiol hydrogen atom was used for reference in the cylinder restriction (described above). The thiol sulfur atoms were not restricted to a defined geometric cylinder. Represented data are within the criteria described above (excludes A, B, C, D, E, and F criteria), except for the  $\text{Ag}^+$  database which was not manually parsed.

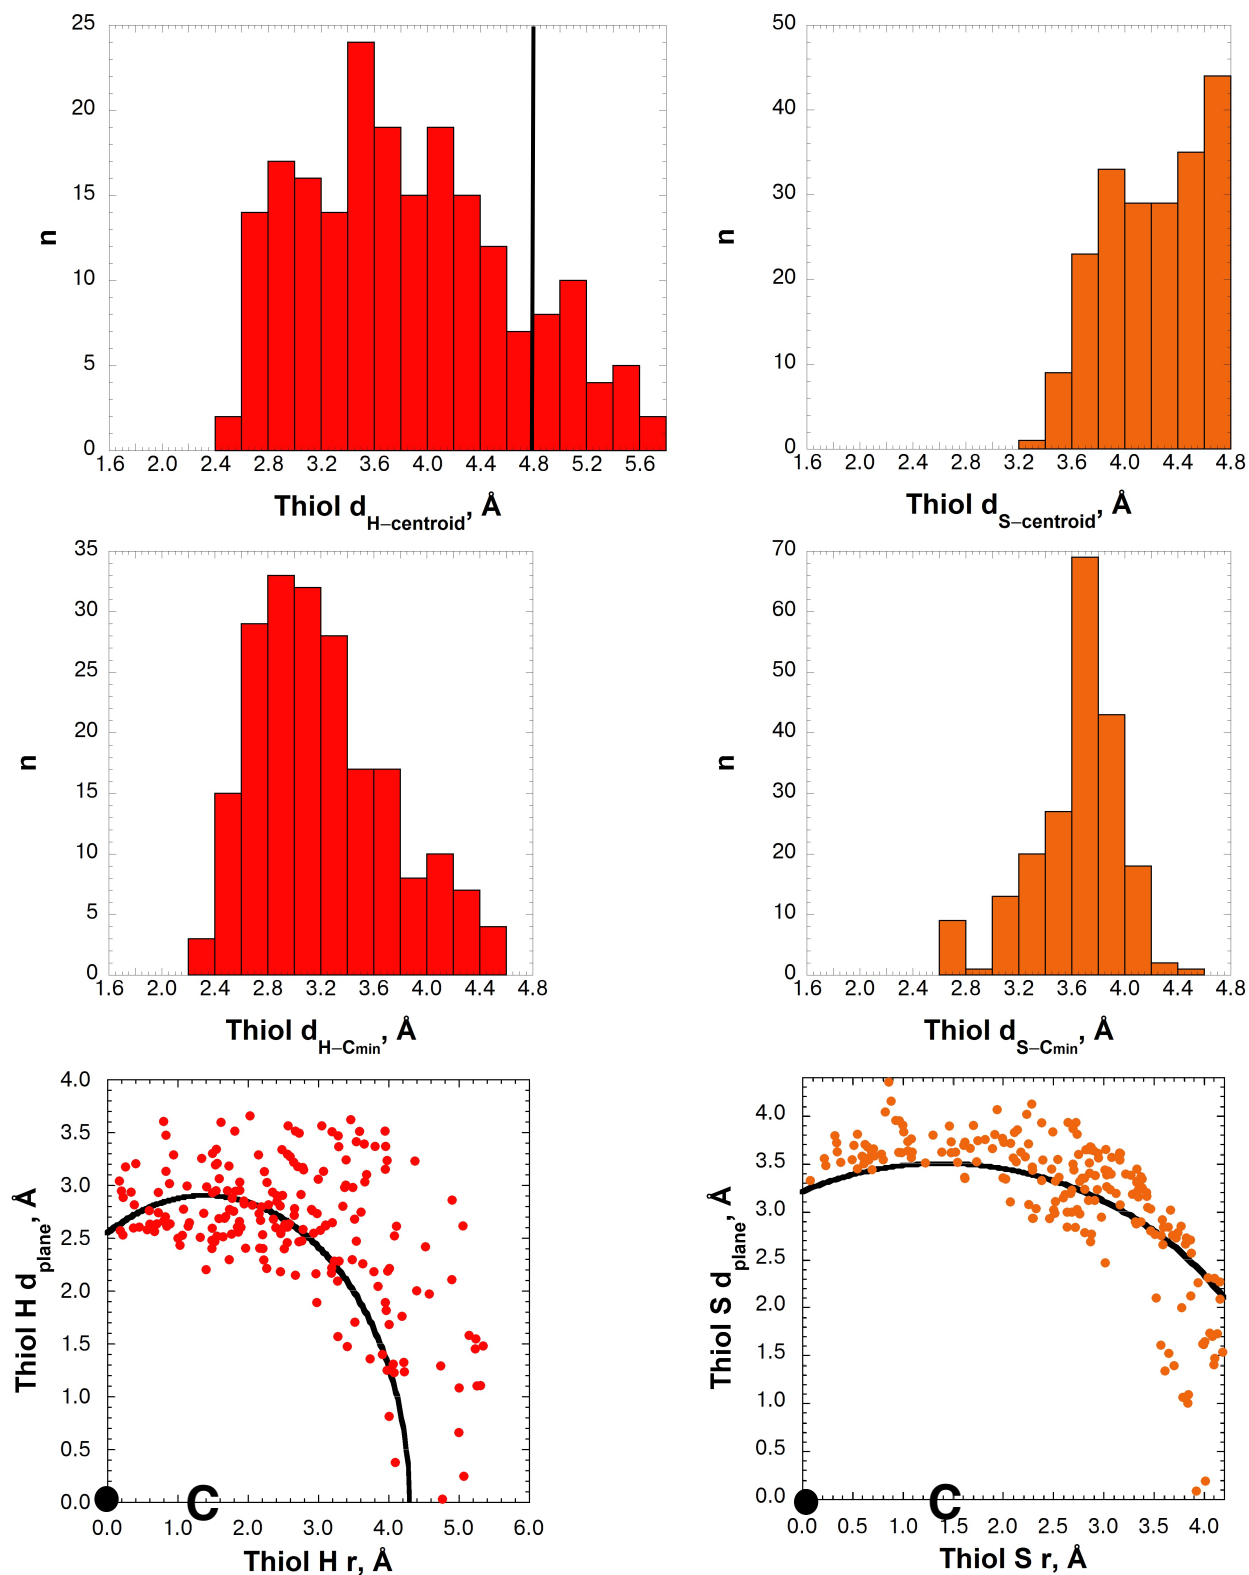

**Figure S103.** S–H/ $\pi$  interactions in the CSD using the reported S–H bond lengths and using the thiol sulfur atom as a reference for the cylinder restriction (thiol S  $d_{\text{plane}} \leq 4.38$  Å, thiol S  $r \leq 4.20$  Å). Plots of  $d_{X\text{-centroid}}$ ,  $d_{X\text{-Cmin}}$ , and atomic coordinates of X with respect to the plane of the



aromatic ring, where X = thiol H or thiol S. Thiol hydrogen atoms are as reported in the CSD and were not restricted to a defined geometric cylinder. The black line indicates the sum of the van der Waals radii for carbon and the respective atoms or ions, where entries below the line are less than the sum of the van der Waals radii ( $\Sigma$  van der Waals radii for C and: Thiol H = 2.90 Å; Thiol S = 3.50 Å).

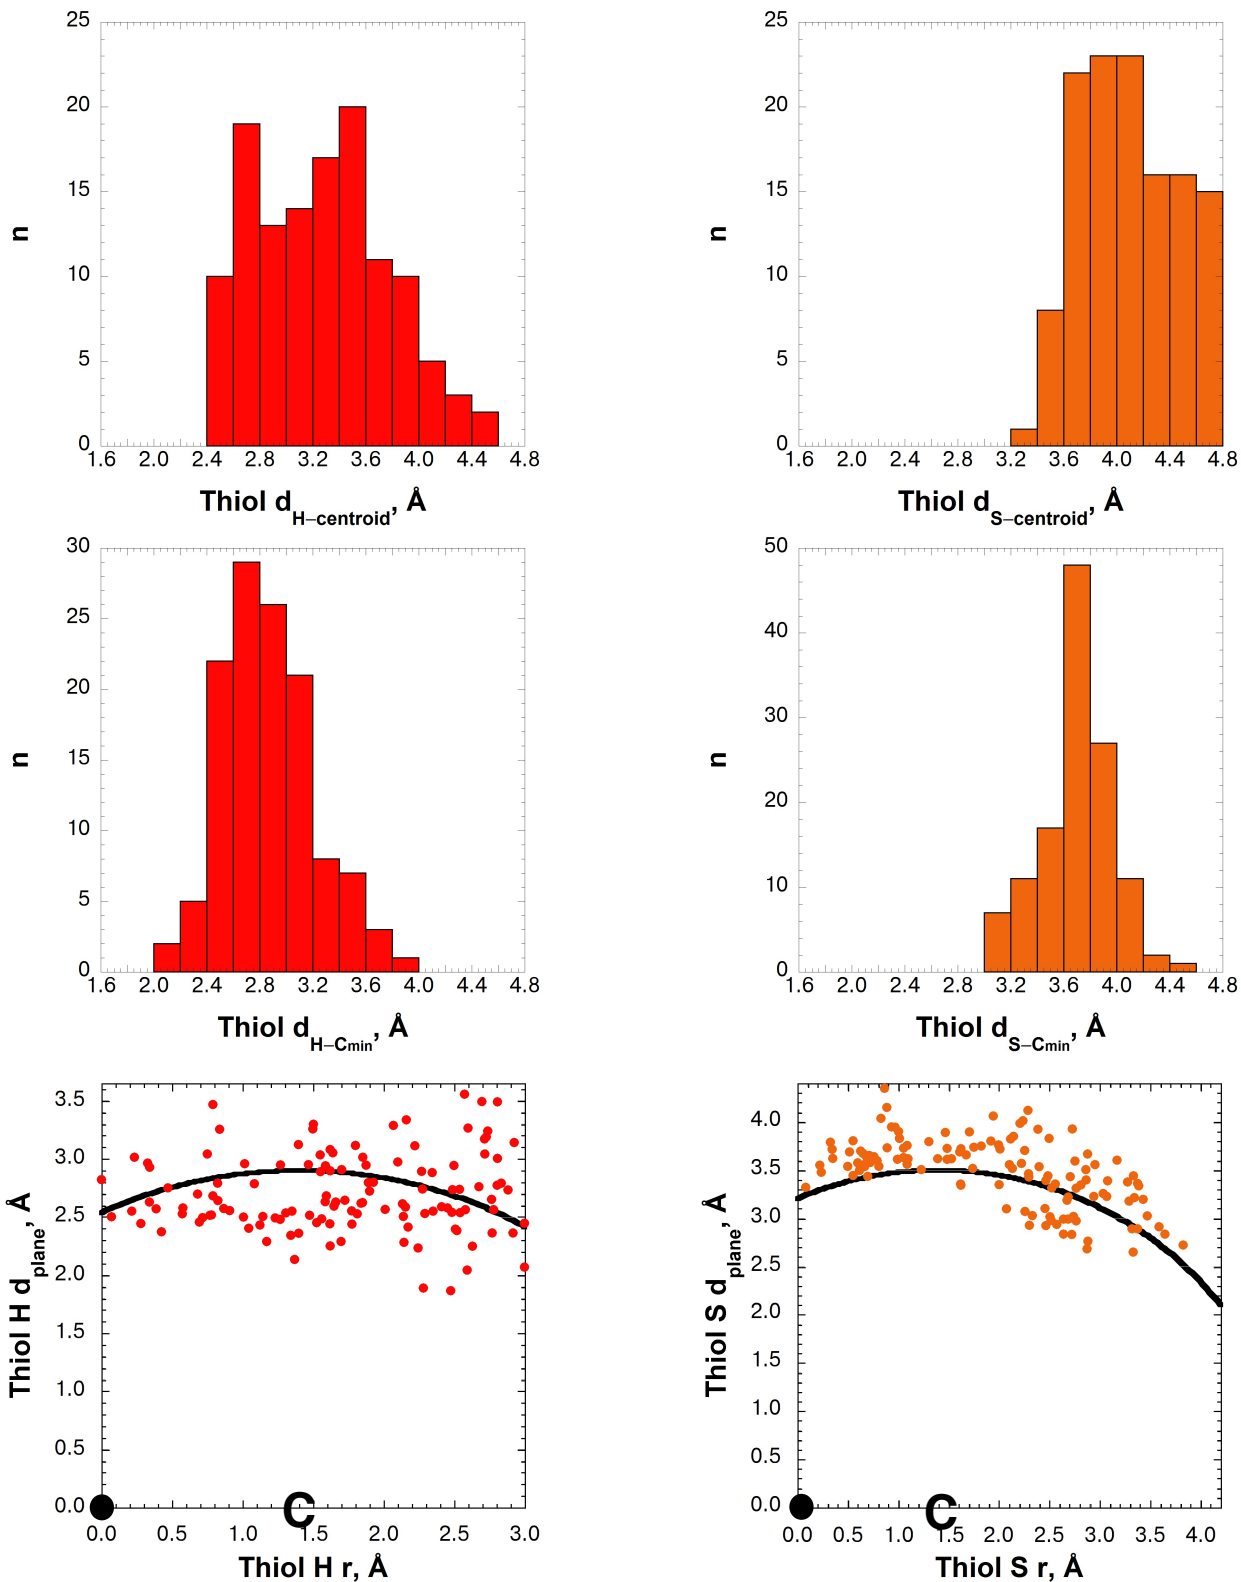

**Figure S104.** S–H/ $\pi$  interactions in the CSD using normalized S–H bond lengths and using the thiol hydrogen atom as a reference for cylinder restriction ( $d_{\text{H-plane}} \leq 3.63$  Å,  $\text{H } r \leq 3.00$  Å). Plots of  $d_{\text{X-centroid}}$ ,  $d_{\text{X-Cmin}}$ , and atomic coordinates of X with respect to the plane of the aromatic ring,

where X = thiol H or thiol S. The position of the thiol hydrogen was changed along the vector of the S–H bond to normalize the S–H bond lengths to 1.338 Å (ConQuest 1.17).<sup>7</sup> Thiol sulfur atoms were not restricted to a geometric cylinder. The black line indicates the sum of the van der Waals radii for carbon and the respective atoms or ions, where entries below the line are less than the sum of the van der Waals radii ( $\Sigma$  van der Waals radii for C and: Thiol H = 2.90 Å; Thiol S = 3.50 Å).

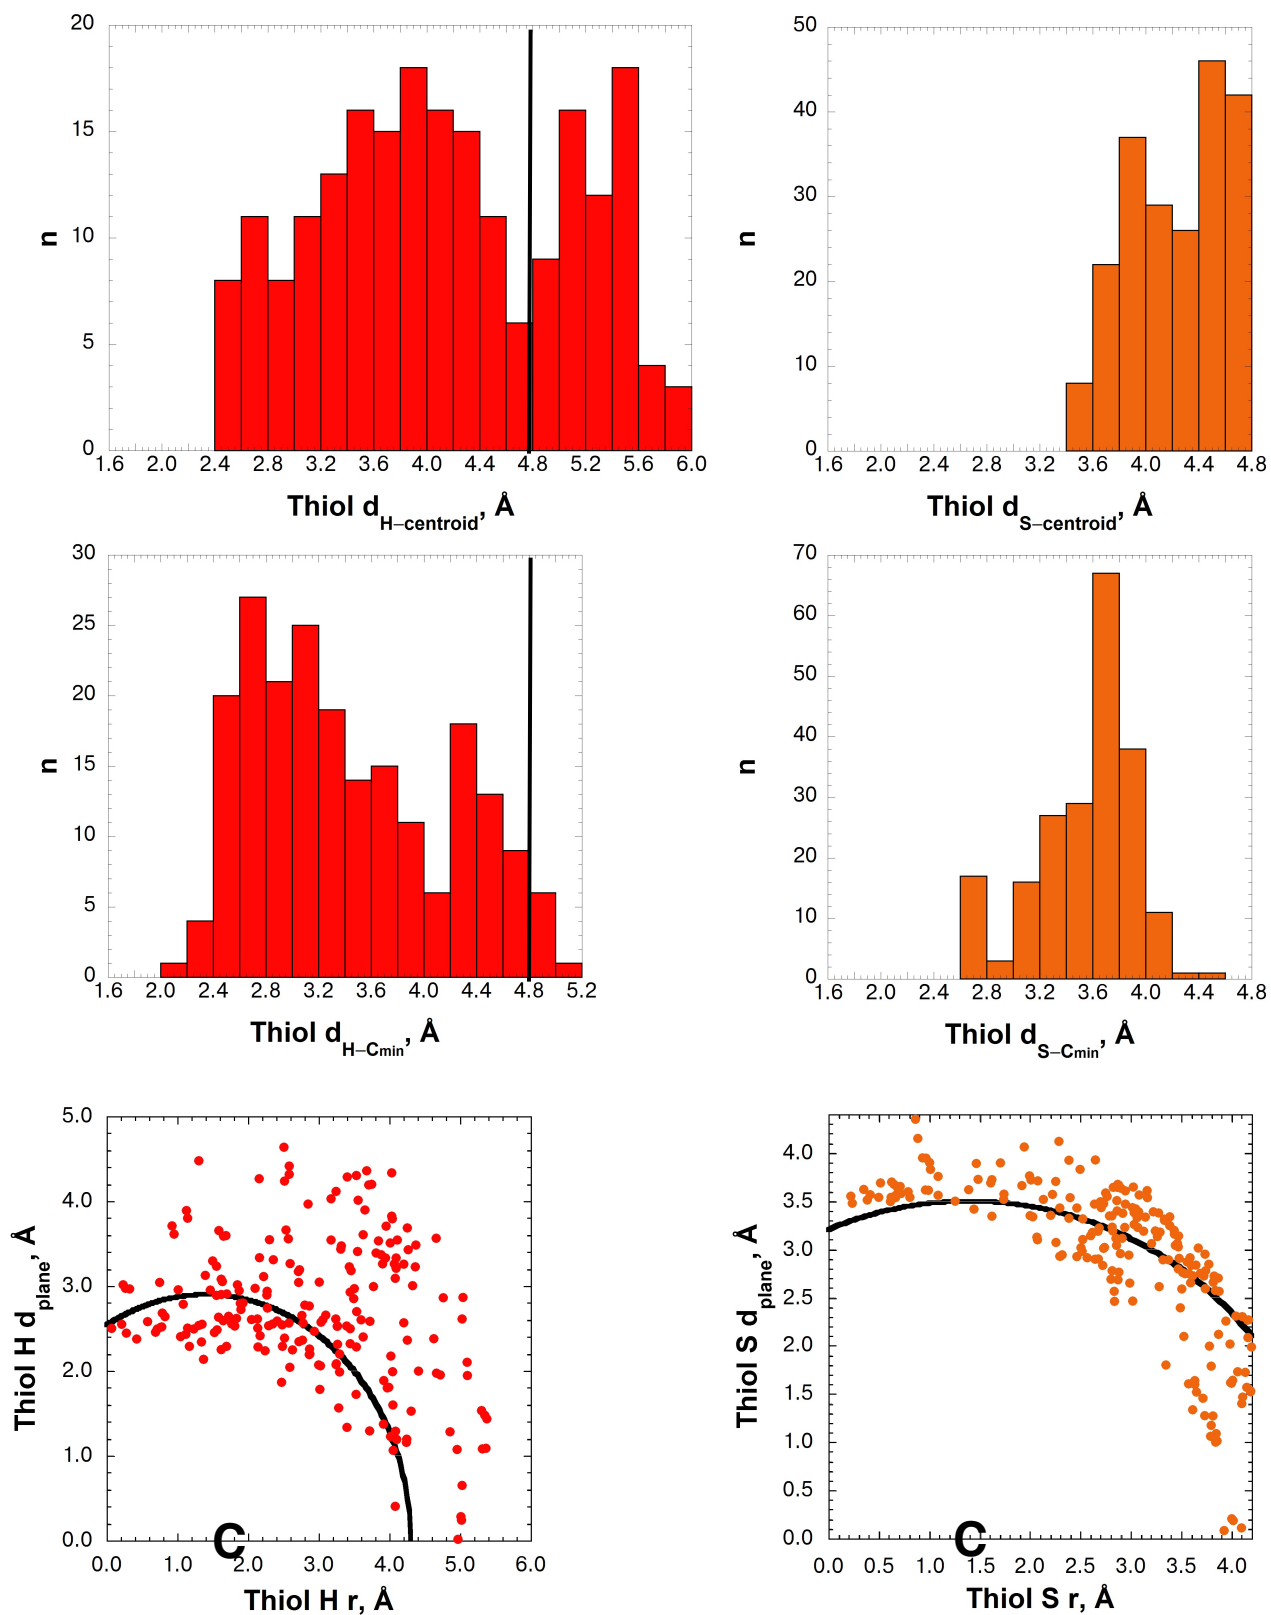

**Figure S105.** S–H/ $\pi$  interactions in the CSD using normalized S–H bond lengths and using the

thiol sulfur atom as a reference for cylinder restriction (thiol S  $d_{\text{plane}} \leq 4.38 \text{ \AA}$ , thiol S  $r \leq 4.20 \text{ \AA}$ ). Plots of  $d_{\text{X-centroid}}$ ,  $d_{\text{X-Cmin}}$ , and atomic coordinates of X with respect to the plane of the aromatic ring, where X = thiol H or thiol S. The position of the thiol hydrogen was changed along the vector of the S–H bond to normalize the S–H bond lengths to  $1.338 \text{ \AA}$  (ConQuest 1.17).<sup>7</sup> Thiol sulfur atoms were not restricted to a geometric cylinder. The black line indicates the sum of the van der Waals radii for carbon and the respective atoms or ions, where entries below the line are less than the sum of the van der Waals radii ( $\Sigma$  van der Waals radii for C and: Thiol H =  $2.90 \text{ \AA}$ ; Thiol S =  $3.50 \text{ \AA}$ ).

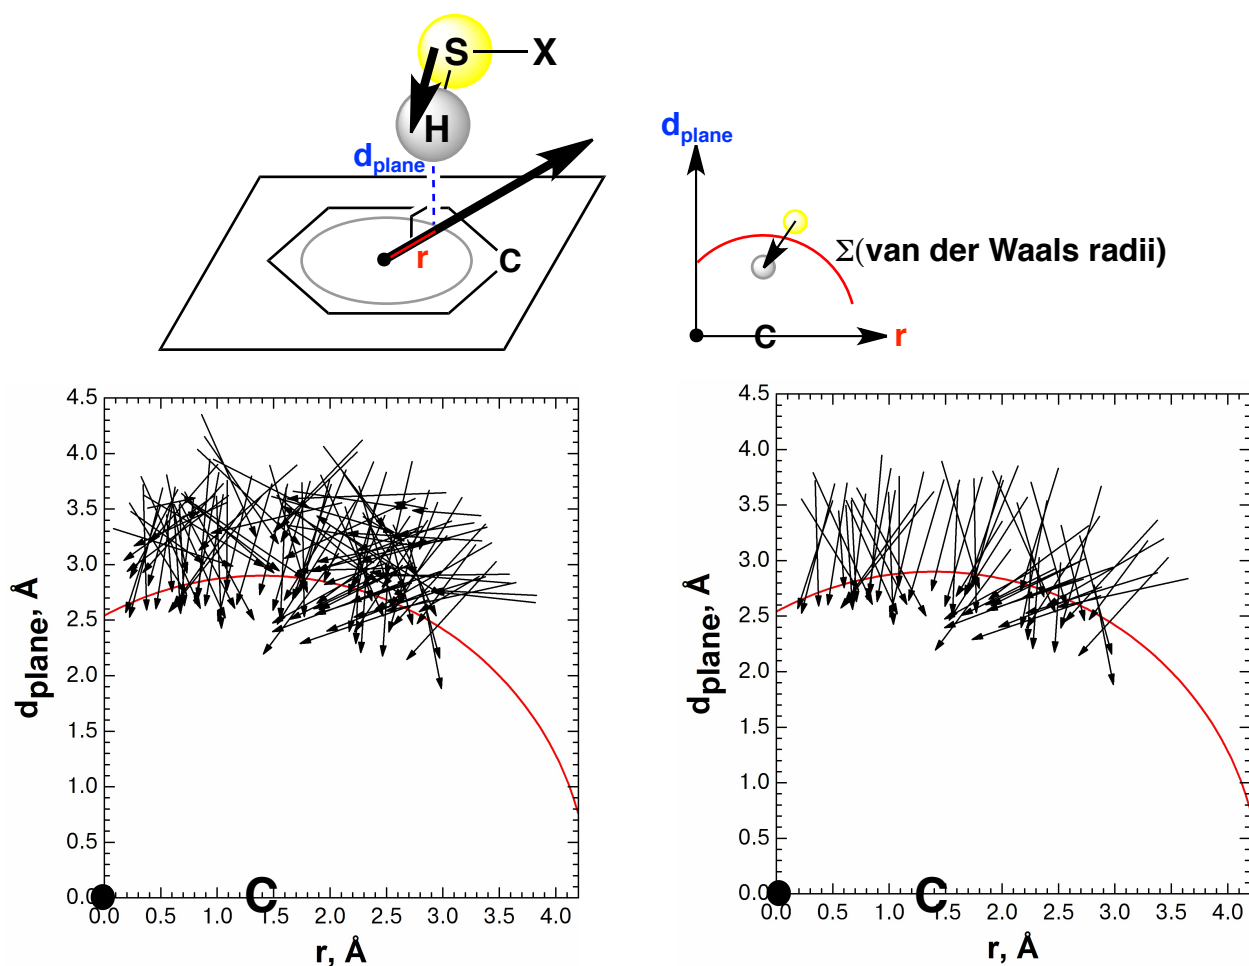

**Figure S106.** Direction of the thiol S–H bonds relative to the plane of the aromatic ring. The vector of the thiol S–H bond can approximate the location of the  $\sigma^*$  orbital in the context of the aromatic ring. The thiol S–H bond is represented as a vector, where the arrow points to the hydrogen atom location. The origin ( $\bullet$ ) and edge (**C**) of the aromatic ring are indicated within the plots, where **C** is located at 1.40 Å from the origin. The red line indicates the sum of the van der Waals radii for carbon and hydrogen (2.90 Å), where entries below the line are less than the sum of the van der Waals radii. Thiol hydrogen atoms are as reported in the CSD and the thiol hydrogen atom was used for reference in the cylinder restriction.

Left: All thiol data shown (excludes A, B, C, D, E, and F criteria)

Right: Only thiol data where  $d_{\text{H-C}_{\text{min}}}$  is less than the sum of the van der Waals radii for carbon and hydrogen atoms (excludes A, B, C, D, E, and F criteria).

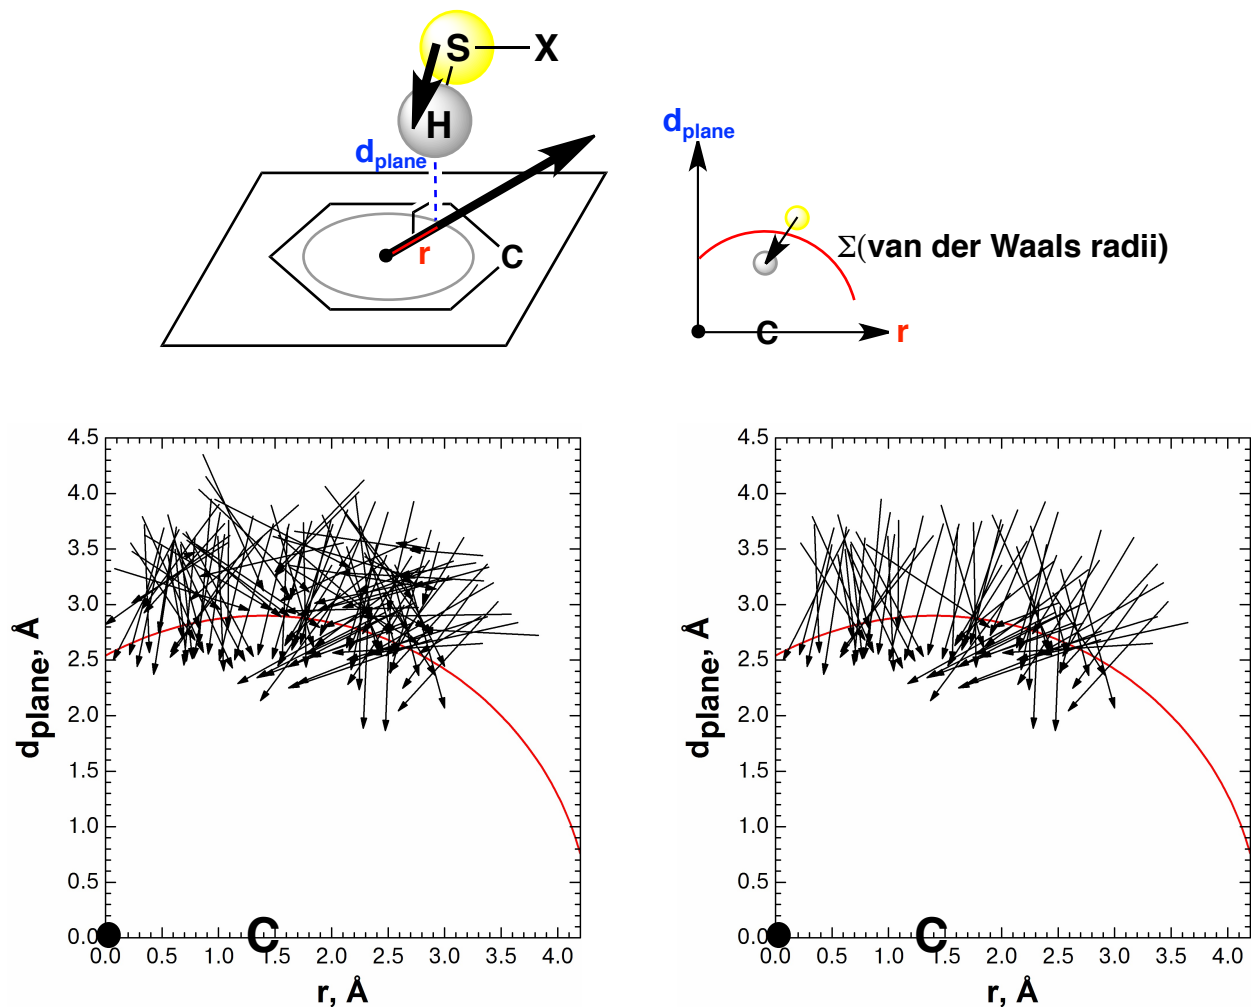

**Figure S107.** Direction of the thiol S–H bonds relative to the plane of the aromatic ring where the thiol bond length has been normalized to 1.338 Å, (ConQuest 1.17).<sup>7</sup> The vector of the thiol S–H bond can approximate the location of the  $\sigma^*$  orbital in the context of the aromatic ring. The thiol S–H bond is represented as a vector, where the arrow points to the hydrogen atom location. The origin (●) and edge (C) of the aromatic ring are indicated within the plots, where C is located at 1.40 Å from the origin. The red line indicates the sum of the van der Waals radii for carbon and hydrogen (2.90 Å), where entries below the line are less than the sum of the van der Waals radii. The cylinder restriction was applied to the thiol hydrogen atoms after the S–H bonds were normalized (thiol H  $d_{\text{plane}} \leq 3.63$  Å, thiol H  $r \leq 3.00$  Å).

Left: All thiol data shown (excludes A, B, C, D, E, and F criteria)

Right: Only thiol data where  $d_{\text{H-C}_{\text{min}}}$  is less than the sum of the van der Waals radii for carbon and hydrogen atoms (excludes A, B, C, D, E, and F criteria)

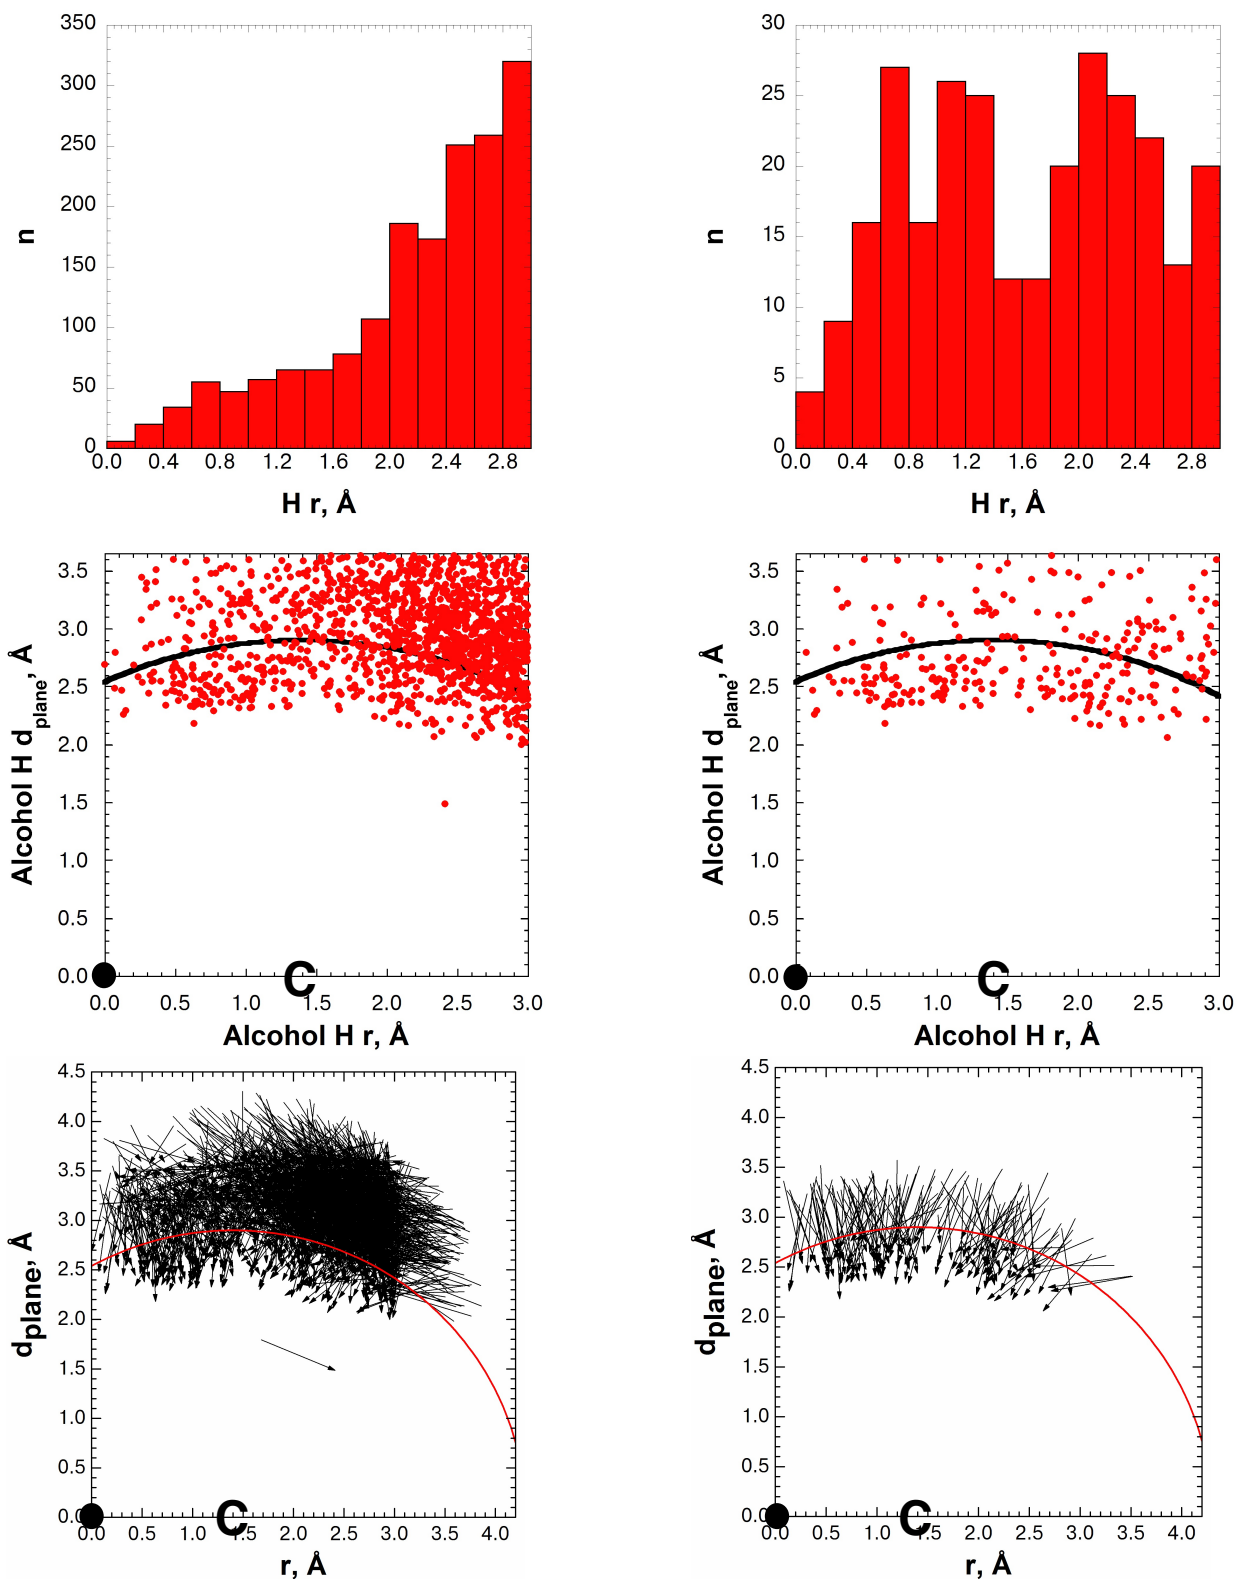

**Figure S108.** O–H/ $\pi$  interactions in the CSD using the reported O–H bond lengths and using the alcohol hydrogen atom as a reference for the cylinder restriction (alcohol H  $d_{\text{plane}} \leq 3.63$  Å, alcohol H  $r \leq 3.00$  Å). Left: all entries identified in the CSD as C–O–H groups that are close to a



6-membered aromatic ring; right: entries identified after excluding potential competing classical hydrogen bonding interactions (where entries containing an oxygen, nitrogen, or metal atom within 2.50 Å of the alcohol hydrogen were removed). Top: histogram plots of H r; middle: atomic coordinates of H with respect to the plane of the aromatic ring (alcohol hydrogen atoms are as reported in the CSD. The black line indicates the sum of the van der Waals radii for carbon and hydrogen); bottom: direction of the alcohol O–H bonds relative to the plane of the aromatic ring. The alcohol O–H bond is represented as a vector, where the arrow points to the hydrogen atom location. The origin (●) and edge (C) of the aromatic ring are indicated within the plots, where C is located at 1.40 Å from the origin. The red line indicates the sum of the van der Waals radii for carbon and hydrogen (2.90 Å), where entries below the line are less than the sum of the van der Waals radii.

## X-ray Crystallography

Orthorhombic, enantiopure crystals of **1** were obtained via slow evaporation at room temperature over one week of a solution of approximately 20 mg of **1** in 10 mL 25% ethyl acetate in hexanes.

Diffractable crystals of *p*-thiocresol were used directly from commercially available material (Sigma) without recrystallization.

The data crystals were selected and mounted on plastic mesh using oil flash-cooled to the data collection temperature. Data were collected on a Bruker-AXS APEX II Duo CCD diffractometer with graphite-monochromated Mo-K $\alpha$  radiation ( $\lambda = 0.71073 \text{ \AA}$ ) for **1** and *p*-thiocresol. Unit cell parameters were obtained from 60 data frames,  $0.3^\circ \omega$ , from three different sections of the Ewald sphere, and refined with the entire diffraction data set. The systematic absences in the data and the unit cell parameters were uniquely consistent to the reported space groups. The data sets were treated with absorption corrections based on redundant multiscan data.<sup>8</sup> The structures were solved using direct methods and refined with full-matrix, least-squares procedures on  $F^2$ .<sup>9</sup> The absolute structure parameter for **1** refined to nil indicating the true hand of the data had been determined. The compound molecule of *p*-thiocresol resides on an inversion center and the full molecule was refined at half-occupancy with symmetry related atoms treated with equal atomic displacement parameters and with a minimal DAMP value for convergence. All non-hydrogen atoms were refined with anisotropic displacement parameters. All hydrogen atoms were treated as idealized contributions. Scattering factors and anomalous dispersion coefficients are contained in the SHELXTL program library.<sup>9</sup> Molecular graphics were obtained using Mercury CSD.<sup>10</sup> The crystallographic Information files for this paper have been deposited as CCDC 1416010 to 1416011. These data can be obtained free of charge via [www.ccdc.cam.ac.uk/conts/retrieving.html](http://www.ccdc.cam.ac.uk/conts/retrieving.html) (or from the CCDC, 12 Union Road, Cambridge CB2 1EZ, UK; fax: +44 1223 336033; email: [deposit@ccdc.cam.ac.uk](mailto:deposit@ccdc.cam.ac.uk)).

## Crystal Structure of 1

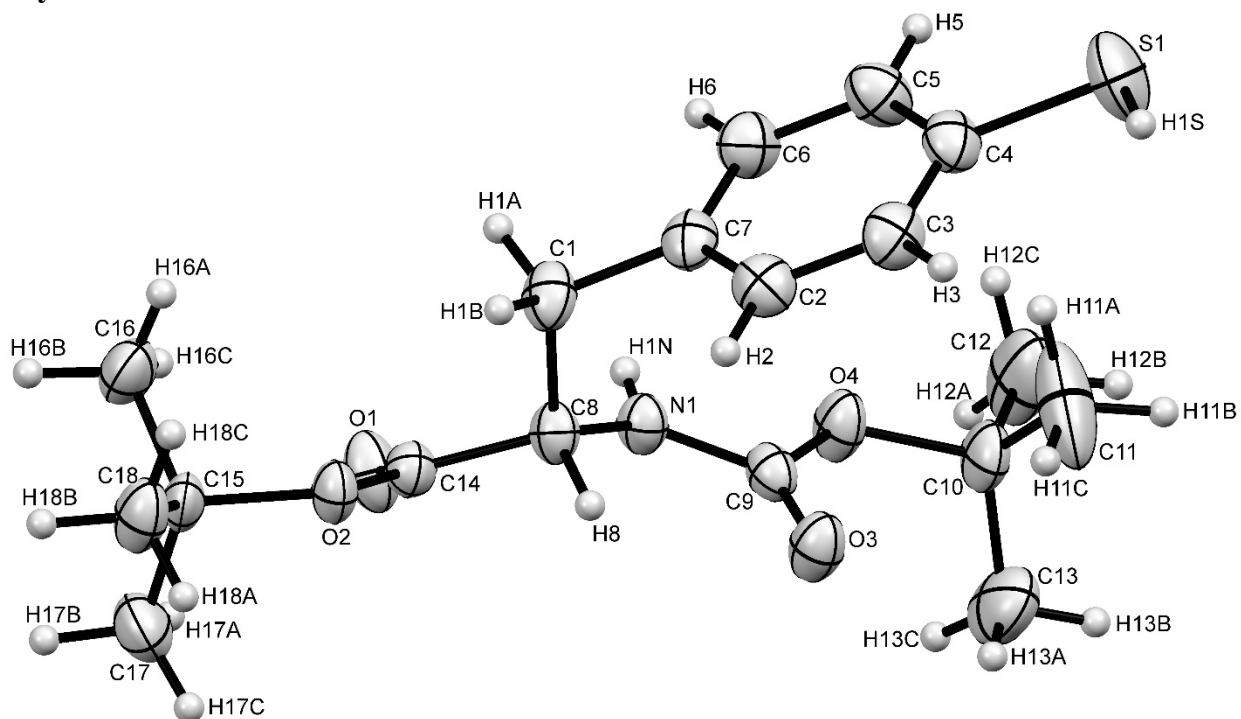

**Figure S109.** ORTEP diagram of **1**, with ellipsoids shown at 50% probability. Crystals were formed via slow evaporation from a solution of 25% ethyl acetate in hexanes (v/v) at room temperature over one week.

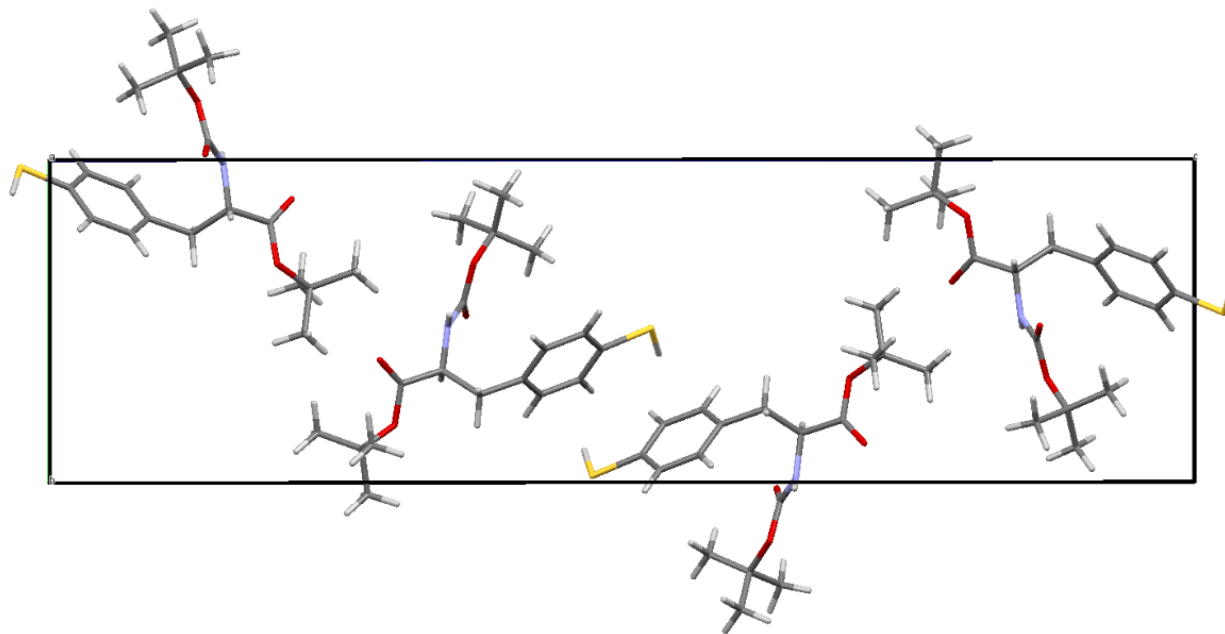

**Figure S110.** Unit cell for orthorhombic crystal structure of **1**. Crystals were formed via slow evaporation from a solution of 25% ethyl acetate in hexanes (v/v) at room temperature over one week.

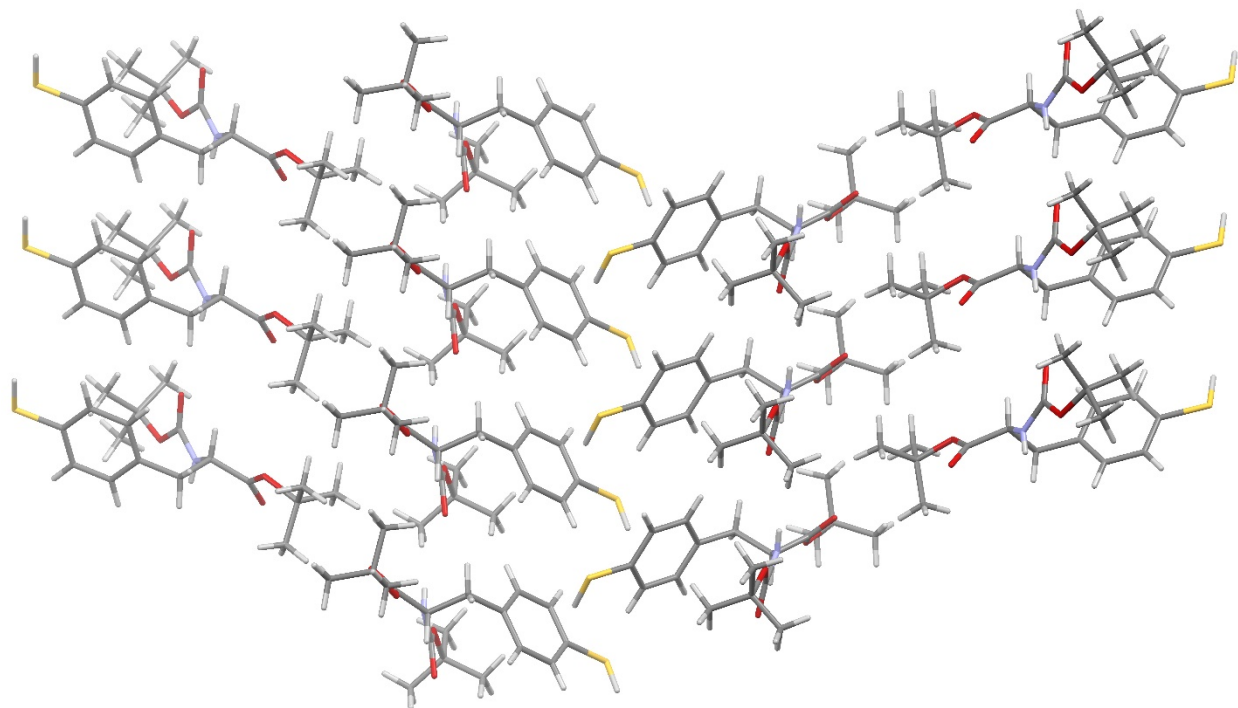

**Figure S111.** Overall crystal packing of **1**. Crystals were formed via slow evaporation from a solution of 25% ethyl acetate in hexanes (v/v) at room temperature over one week.

**Table S22.** Crystallographic data and refinement details for orthorhombic crystals of **1**.

|                                                           |                                                                                         |                                           |
|-----------------------------------------------------------|-----------------------------------------------------------------------------------------|-------------------------------------------|
| empirical formula                                         | C <sub>18</sub> H <sub>27</sub> NO <sub>4</sub> S                                       |                                           |
| formula weight                                            | 353.46                                                                                  |                                           |
| <i>T</i> (K)                                              | 200(2)                                                                                  |                                           |
| wavelength (Å)                                            | 0.71073                                                                                 |                                           |
| crystal system, space group                               | Orthorhombic, <i>P</i> 2 <sub>1</sub> 2 <sub>1</sub> 2 <sub>1</sub>                     |                                           |
| Unit cell dimensions (Å, °)                               | <i>a</i> = 5.4629(6)                                                                    | $\alpha = 90$                             |
|                                                           | <i>b</i> = 10.1217(11)                                                                  | $\beta = 90$                              |
|                                                           | <i>c</i> = 35.898(4)                                                                    | $\gamma = 90$                             |
| Volume (Å <sup>3</sup> )                                  | 1984.9(4)                                                                               |                                           |
| <i>Z</i> , <i>Z'</i> , calcd density (g/cm <sup>3</sup> ) | 4, 1, 1.183                                                                             |                                           |
| absorption coefficient (mm <sup>-1</sup> )                | 0.182                                                                                   |                                           |
| <i>F</i> (000)                                            | 760                                                                                     |                                           |
| crystal size (mm)                                         | 0.188 x 0.195 x 0.328                                                                   |                                           |
| $\theta$ range for data collection                        | 2.09 to 27.47°                                                                          |                                           |
| Index ranges                                              | -6 ≤ <i>h</i> ≤ 7, -13 ≤ <i>k</i> ≤ 13, -46 ≤ <i>l</i> ≤ 46                             |                                           |
| Reflections collected/ unique                             | 15122/4518 [R(int) = 0.0378]                                                            |                                           |
| Coverage of independent reflections                       | 100.0%                                                                                  |                                           |
| Absorption correction                                     | multi-scan                                                                              |                                           |
| Max. and min. transmission                                | 0.7456 and 0.6789                                                                       |                                           |
| Structure solution technique                              | direct methods                                                                          |                                           |
| Refinement method                                         | Full-matrix least-squares on <i>F</i> <sup>2</sup>                                      |                                           |
| Function minimized                                        | $\Sigma w(F_o^2 - F_c^2)^2$                                                             |                                           |
| Data / restraints / parameters                            | 4518 / 0 / 231                                                                          |                                           |
| Goodness-of-fit on <i>F</i> <sup>2</sup>                  | 1.015                                                                                   |                                           |
| Final <i>R</i> indices                                    | 3579 data; <i>I</i> > 2σ( <i>I</i> )                                                    | <i>R</i> 1 = 0.0403, <i>wR</i> 2 = 0.0870 |
|                                                           | all data                                                                                | <i>R</i> 1 = 0.0578, <i>wR</i> 2 = 0.0962 |
| Weighting scheme                                          | $w = 1 / [\sigma^2(F_o^2) + (0.0425P)^2 + 0.2479P]$<br>where $P = (F_o^2 + 2F_c^2) / 3$ |                                           |
| Largest diff. peak and hole                               | 0.161 and -0.232 eÅ <sup>-3</sup>                                                       |                                           |
| R.M.S. deviation from mean                                | 0.034 eÅ <sup>-3</sup>                                                                  |                                           |

**Table S23.** Atomic coordinates ( $\times 10^4$ ) and equivalent isotropic displacement parameters ( $\text{Å}^2 \times 10^3$ ) for orthorhombic crystals of **1**.  $U(\text{eq})$  is defined as one third of the trace of the orthogonalized  $U_{ij}$  tensor.

|     | <b>x/a</b>  | <b>y/b</b>  | <b>z/c</b>  | <b>U(eq)</b> |
|-----|-------------|-------------|-------------|--------------|
| S1  | 0.34521(19) | 0.52173(9)  | 0.52548(2)  | 0.0622(3)    |
| N1  | 0.5840(4)   | 0.5118(2)   | 0.34791(6)  | 0.0304(5)    |
| O1  | 0.8164(4)   | 0.62103(16) | 0.28823(5)  | 0.0436(5)    |
| O2  | 0.6554(3)   | 0.82223(15) | 0.30105(4)  | 0.0313(4)    |
| O3  | 0.1861(3)   | 0.48255(17) | 0.36414(5)  | 0.0403(4)    |
| O4  | 0.4708(3)   | 0.31949(16) | 0.37059(5)  | 0.0403(5)    |
| C1  | 0.6943(5)   | 0.7273(2)   | 0.37559(7)  | 0.0393(6)    |
| C2  | 0.3915(5)   | 0.7269(2)   | 0.42901(7)  | 0.0383(6)    |
| C3  | 0.3109(5)   | 0.6810(3)   | 0.46314(7)  | 0.0397(6)    |
| C4  | 0.4424(5)   | 0.5864(3)   | 0.48204(7)  | 0.0387(6)    |
| C5  | 0.6586(5)   | 0.5389(3)   | 0.46688(7)  | 0.0427(6)    |
| C6  | 0.7381(5)   | 0.5859(3)   | 0.43259(7)  | 0.0405(7)    |
| C7  | 0.6071(5)   | 0.6801(2)   | 0.41336(7)  | 0.0346(6)    |
| C8  | 0.5698(5)   | 0.6527(2)   | 0.34302(7)  | 0.0305(5)    |
| C9  | 0.3936(5)   | 0.4416(2)   | 0.36141(6)  | 0.0309(6)    |
| C10 | 0.3022(5)   | 0.2244(2)   | 0.38818(8)  | 0.0414(6)    |
| C11 | 0.2005(10)  | 0.2795(3)   | 0.42364(10) | 0.0920(15)   |
| C12 | 0.4681(7)   | 0.1081(3)   | 0.39590(12) | 0.0736(11)   |
| C13 | 0.1084(7)   | 0.1843(3)   | 0.36078(10) | 0.0678(10)   |
| C14 | 0.6941(5)   | 0.6938(2)   | 0.30706(6)  | 0.0301(5)    |
| C15 | 0.7963(5)   | 0.8954(2)   | 0.27215(7)  | 0.0320(5)    |
| C16 | 0.0670(5)   | 0.8846(3)   | 0.28079(8)  | 0.0436(7)    |
| C17 | 0.7318(6)   | 0.8458(3)   | 0.23376(7)  | 0.0483(8)    |
| C18 | 0.7083(5)   | 0.0368(2)   | 0.27747(8)  | 0.0437(7)    |

**Table S24.** Bond lengths [Å] and angles [°] for orthorhombic crystals of **1**.Bond lengths

|          |          |          |          |
|----------|----------|----------|----------|
| S1-C4    | 1.773(3) | S1-H1S   | 1.26(4)  |
| N1-C9    | 1.350(3) | N1-C8    | 1.439(3) |
| N1-H1N   | 0.75(3)  | O1-C14   | 1.202(3) |
| O2-C14   | 1.335(3) | O2-C15   | 1.489(3) |
| O3-C9    | 1.211(3) | O4-C9    | 1.346(3) |
| O4-C10   | 1.474(3) | C1-C7    | 1.514(3) |
| C1-C8    | 1.549(3) | C1-H1A   | 0.99     |
| C1-H1B   | 0.99     | C2-C3    | 1.383(4) |
| C2-C7    | 1.388(4) | C2-H2    | 0.95     |
| C3-C4    | 1.376(4) | C3-H3    | 0.95     |
| C4-C5    | 1.386(4) | C5-C6    | 1.389(4) |
| C5-H5    | 0.95     | C6-C7    | 1.378(4) |
| C6-H6    | 0.95     | C8-C14   | 1.517(3) |
| C8-H8    | 1.0      | C10-C11  | 1.497(4) |
| C10-C13  | 1.501(4) | C10-C12  | 1.511(4) |
| C11-H11A | 0.98     | C11-H11B | 0.98     |
| C11-H11C | 0.98     | C12-H12A | 0.98     |
| C12-H12B | 0.98     | C12-H12C | 0.98     |
| C13-H13A | 0.98     | C13-H13B | 0.98     |
| C13-H13C | 0.98     | C15-C17  | 1.509(4) |
| C15-C16  | 1.515(4) | C15-C18  | 1.522(4) |
| C16-H16A | 0.98     | C16-H16B | 0.98     |
| C16-H16C | 0.98     | C17-H17A | 0.98     |
| C17-H17B | 0.98     | C17-H17C | 0.98     |
| C18-H18A | 0.98     | C18-H18B | 0.98     |
| C18-H18C | 0.98     |          |          |

Bond angles

|            |            |            |          |
|------------|------------|------------|----------|
| C4-S1-H1S  | 99.4(15)   | C9-N1-C8   | 121.6(2) |
| C9-N1-H1N  | 118.(2)    | C8-N1-H1N  | 117.(2)  |
| C14-O2-C15 | 121.01(19) | C9-O4-C10  | 120.6(2) |
| C7-C1-C8   | 112.6(2)   | C7-C1-H1A  | 109.1    |
| C8-C1-H1A  | 109.1      | C7-C1-H1B  | 109.1    |
| C8-C1-H1B  | 109.1      | H1A-C1-H1B | 107.8    |
| C3-C2-C7   | 120.9(3)   | C3-C2-H2   | 119.5    |
| C7-C2-H2   | 119.5      | C4-C3-C2   | 120.3(3) |



|               |            |               |            |
|---------------|------------|---------------|------------|
| C4-C3-H3      | 119.8      | C2-C3-H3      | 119.8      |
| C3-C4-C5      | 119.5(2)   | C3-C4-S1      | 122.3(2)   |
| C5-C4-S1      | 118.2(2)   | C4-C5-C6      | 119.7(3)   |
| C4-C5-H5      | 120.1      | C6-C5-H5      | 120.1      |
| C7-C6-C5      | 121.2(2)   | C7-C6-H6      | 119.4      |
| C5-C6-H6      | 119.4      | C6-C7-C2      | 118.3(2)   |
| C6-C7-C1      | 120.2(2)   | C2-C7-C1      | 121.4(2)   |
| N1-C8-C14     | 110.54(19) | N1-C8-C1      | 111.6(2)   |
| C14-C8-C1     | 108.2(2)   | N1-C8-H8      | 108.8      |
| C14-C8-H8     | 108.8      | C1-C8-H8      | 108.8      |
| O3-C9-O4      | 126.0(2)   | O3-C9-N1      | 124.7(2)   |
| O4-C9-N1      | 109.3(2)   | O4-C10-C11    | 110.6(2)   |
| O4-C10-C13    | 109.7(2)   | C11-C10-C13   | 113.3(3)   |
| O4-C10-C12    | 102.3(2)   | C11-C10-C12   | 110.9(3)   |
| C13-C10-C12   | 109.4(3)   | C10-C11-H11A  | 109.5      |
| C10-C11-H11B  | 109.5      | H11A-C11-H11B | 109.5      |
| C10-C11-H11C  | 109.5      | H11A-C11-H11C | 109.5      |
| H11B-C11-H11C | 109.5      | C10-C12-H12A  | 109.5      |
| C10-C12-H12B  | 109.5      | H12A-C12-H12B | 109.5      |
| C10-C12-H12C  | 109.5      | H12A-C12-H12C | 109.5      |
| H12B-C12-H12C | 109.5      | C10-C13-H13A  | 109.5      |
| C10-C13-H13B  | 109.5      | H13A-C13-H13B | 109.5      |
| C10-C13-H13C  | 109.5      | H13A-C13-H13C | 109.5      |
| H13B-C13-H13C | 109.5      | O1-C14-O2     | 126.4(2)   |
| O1-C14-C8     | 124.0(2)   | O2-C14-C8     | 109.46(19) |
| O2-C15-C17    | 110.5(2)   | O2-C15-C16    | 109.0(2)   |
| C17-C15-C16   | 113.0(2)   | O2-C15-C18    | 102.55(19) |
| C17-C15-C18   | 110.7(2)   | C16-C15-C18   | 110.5(2)   |
| C15-C16-H16A  | 109.5      | C15-C16-H16B  | 109.5      |
| H16A-C16-H16B | 109.5      | C15-C16-H16C  | 109.5      |
| H16A-C16-H16C | 109.5      | H16B-C16-H16C | 109.5      |
| C15-C17-H17A  | 109.5      | C15-C17-H17B  | 109.5      |
| H17A-C17-H17B | 109.5      | C15-C17-H17C  | 109.5      |
| H17A-C17-H17C | 109.5      | H17B-C17-H17C | 109.5      |
| C15-C18-H18A  | 109.5      | C15-C18-H18B  | 109.5      |
| H18A-C18-H18B | 109.5      | C15-C18-H18C  | 109.5      |
| H18A-C18-H18C | 109.5      | H18B-C18-H18C | 109.5      |

**Table S25.** Anisotropic atomic displacement parameters ( $\text{\AA}^2$ ) for orthorhombic crystals of **1**. The anisotropic atomic displacement factor exponent takes the form:  $-2\pi^2 [ h^2 a^2 U_{11} + \dots + 2 h k a^* b^* U_{12} ]$

|     | $U_{11}$   | $U_{22}$   | $U_{33}$   | $U_{23}$    | $U_{13}$    | $U_{12}$    |
|-----|------------|------------|------------|-------------|-------------|-------------|
| S1  | 0.0795(6)  | 0.0668(5)  | 0.0404(4)  | 0.0099(4)   | 0.0190(4)   | 0.0032(5)   |
| N1  | 0.0320(12) | 0.0243(10) | 0.0349(11) | 0.0032(9)   | 0.0036(10)  | 0.0016(10)  |
| O1  | 0.0578(12) | 0.0335(9)  | 0.0395(10) | 0.0021(8)   | 0.0175(10)  | 0.0070(9)   |
| O2  | 0.0321(9)  | 0.0254(7)  | 0.0365(9)  | 0.0080(7)   | 0.0065(8)   | -0.0009(7)  |
| O3  | 0.0353(10) | 0.0314(9)  | 0.0542(11) | 0.0077(8)   | 0.0049(9)   | 0.0006(8)   |
| O4  | 0.0386(11) | 0.0255(8)  | 0.0568(11) | 0.0109(8)   | 0.0052(9)   | -0.0013(8)  |
| C1  | 0.0486(16) | 0.0307(12) | 0.0387(14) | -0.0031(11) | 0.0077(13)  | -0.0099(12) |
| C2  | 0.0447(16) | 0.0321(13) | 0.0380(14) | -0.0035(11) | -0.0004(12) | 0.0013(12)  |
| C3  | 0.0405(15) | 0.0406(14) | 0.0380(14) | -0.0077(12) | 0.0074(13)  | 0.0022(13)  |
| C4  | 0.0468(16) | 0.0400(14) | 0.0292(13) | -0.0035(11) | 0.0033(12)  | -0.0054(13) |
| C5  | 0.0454(16) | 0.0431(14) | 0.0398(14) | 0.0018(12)  | -0.0004(13) | 0.0087(14)  |
| C6  | 0.0378(16) | 0.0448(15) | 0.0389(14) | -0.0040(12) | 0.0058(12)  | 0.0041(12)  |
| C7  | 0.0410(15) | 0.0315(12) | 0.0314(13) | -0.0069(11) | 0.0030(11)  | -0.0088(12) |
| C8  | 0.0357(14) | 0.0216(11) | 0.0341(13) | 0.0022(10)  | 0.0047(11)  | 0.0000(10)  |
| C9  | 0.0413(16) | 0.0234(11) | 0.0280(12) | 0.0019(10)  | -0.0004(11) | -0.0026(10) |
| C10 | 0.0463(16) | 0.0280(12) | 0.0499(16) | 0.0096(12)  | 0.0049(14)  | -0.0100(12) |
| C11 | 0.166(4)   | 0.0501(19) | 0.060(2)   | 0.0021(17)  | 0.054(3)    | -0.022(3)   |
| C12 | 0.063(2)   | 0.0437(18) | 0.113(3)   | 0.038(2)    | 0.004(2)    | -0.0029(16) |
| C13 | 0.062(2)   | 0.0511(18) | 0.090(3)   | 0.0147(18)  | -0.011(2)   | -0.0226(17) |
| C14 | 0.0311(13) | 0.0282(11) | 0.0308(12) | 0.0013(10)  | 0.0014(11)  | -0.0024(11) |
| C15 | 0.0266(13) | 0.0333(12) | 0.0361(13) | 0.0107(10)  | 0.0054(11)  | -0.0057(11) |
| C16 | 0.0296(15) | 0.0446(15) | 0.0564(17) | 0.0082(14)  | 0.0025(13)  | -0.0044(13) |
| C17 | 0.059(2)   | 0.0519(17) | 0.0345(14) | 0.0085(13)  | 0.0024(13)  | -0.0062(14) |
| C18 | 0.0398(16) | 0.0316(13) | 0.0595(17) | 0.0125(13)  | 0.0065(14)  | -0.0016(12) |

**Table S26.** Hydrogen atomic coordinates and isotropic atomic displacement parameters ( $\text{\AA}^2$ ) for orthorhombic crystals of **1**.

|      | <b>x/a</b> | <b>y/b</b> | <b>z/c</b> | <b>U(eq)</b> |
|------|------------|------------|------------|--------------|
| H1S  | 0.173(7)   | 0.601(3)   | 0.5324(9)  | 0.083(11)    |
| H1N  | 0.709(5)   | 0.482(3)   | 0.3493(7)  | 0.032(8)     |
| H1A  | 0.8737     | 0.7150     | 0.3739     | 0.047        |
| H1B  | 0.6597     | 0.8230     | 0.3732     | 0.047        |
| H2   | 0.2980     | 0.7915     | 0.4161     | 0.046        |
| H3   | 0.1640     | 0.7149     | 0.4736     | 0.048        |
| H5   | 0.7519     | 0.4746     | 0.4799     | 0.051        |
| H6   | 0.8856     | 0.5524     | 0.4222     | 0.049        |
| H8   | 0.3936     | 0.6792     | 0.3419     | 0.037        |
| H11A | 0.3347     | 0.3130     | 0.4391     | 0.138        |
| H11B | 0.1129     | 0.2099     | 0.4371     | 0.138        |
| H11C | 0.0874     | 0.3518     | 0.4179     | 0.138        |
| H12A | 0.5273     | 0.0716     | 0.3723     | 0.11         |
| H12B | 0.3769     | 0.0401     | 0.4095     | 0.11         |
| H12C | 0.6078     | 0.1373     | 0.4109     | 0.11         |
| H13A | -0.0109    | 0.2559     | 0.3581     | 0.102        |
| H13B | 0.0254     | 0.1046     | 0.3698     | 0.102        |
| H13C | 0.1843     | 0.1661     | 0.3366     | 0.102        |
| H16A | 1.0969     | 0.9134     | 0.3064     | 0.065        |
| H16B | 1.1597     | 0.9408     | 0.2636     | 0.065        |
| H16C | 1.1197     | 0.7926     | 0.2779     | 0.065        |
| H17A | 0.7926     | 0.7553     | 0.2307     | 0.072        |
| H17B | 0.8072     | 0.9030     | 0.2150     | 0.072        |
| H17C | 0.5536     | 0.8467     | 0.2306     | 0.072        |
| H18A | 0.5309     | 1.0408     | 0.2736     | 0.065        |
| H18B | 0.7900     | 1.0945     | 0.2594     | 0.065        |
| H18C | 0.7474     | 1.0663     | 0.3028     | 0.065        |

**Table S27.** Torsion angles (°) for orthorhombic crystals of **1**.

|                |           |                |           |
|----------------|-----------|----------------|-----------|
| C7-C2-C3-C4    | -0.8(4)   | C2-C3-C4-C5    | 1.0(4)    |
| C2-C3-C4-S1    | -178.9(2) | C3-C4-C5-C6    | -0.9(4)   |
| S1-C4-C5-C6    | 179.0(2)  | C4-C5-C6-C7    | 0.6(4)    |
| C5-C6-C7-C2    | -0.4(4)   | C5-C6-C7-C1    | -178.5(2) |
| C3-C2-C7-C6    | 0.5(4)    | C3-C2-C7-C1    | 178.6(2)  |
| C8-C1-C7-C6    | 95.4(3)   | C8-C1-C7-C2    | -82.6(3)  |
| C9-N1-C8-C14   | -140.0(2) | C9-N1-C8-C1    | 99.6(3)   |
| C7-C1-C8-N1    | -50.5(3)  | C7-C1-C8-C14   | -172.3(2) |
| C10-O4-C9-O3   | -4.7(4)   | C10-O4-C9-N1   | 176.4(2)  |
| C8-N1-C9-O3    | 14.1(4)   | C8-N1-C9-O4    | -167.0(2) |
| C9-O4-C10-C11  | -57.8(4)  | C9-O4-C10-C13  | 68.0(3)   |
| C9-O4-C10-C12  | -176.0(3) | C15-O2-C14-O1  | -9.5(4)   |
| C15-O2-C14-C8  | 167.5(2)  | N1-C8-C14-O1   | -9.7(4)   |
| C1-C8-C14-O1   | 112.7(3)  | N1-C8-C14-O2   | 173.2(2)  |
| C1-C8-C14-O2   | -64.4(3)  | C14-O2-C15-C17 | 66.5(3)   |
| C14-O2-C15-C16 | -58.3(3)  | C14-O2-C15-C18 | -175.4(2) |

### Crystal Structure of *p*-thiocresol

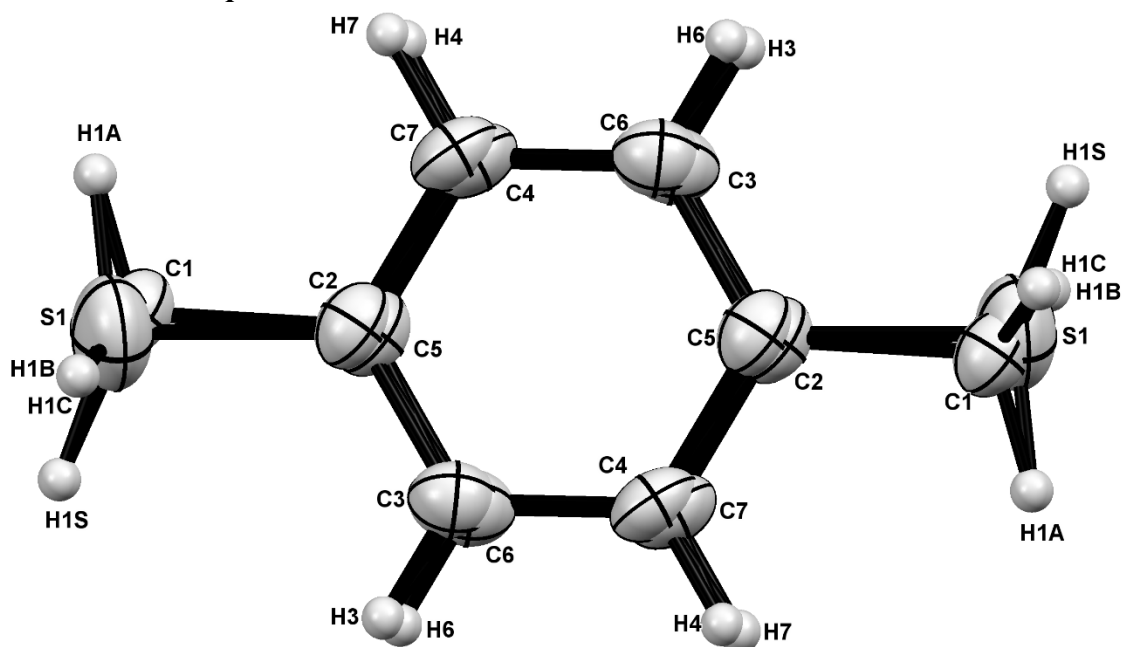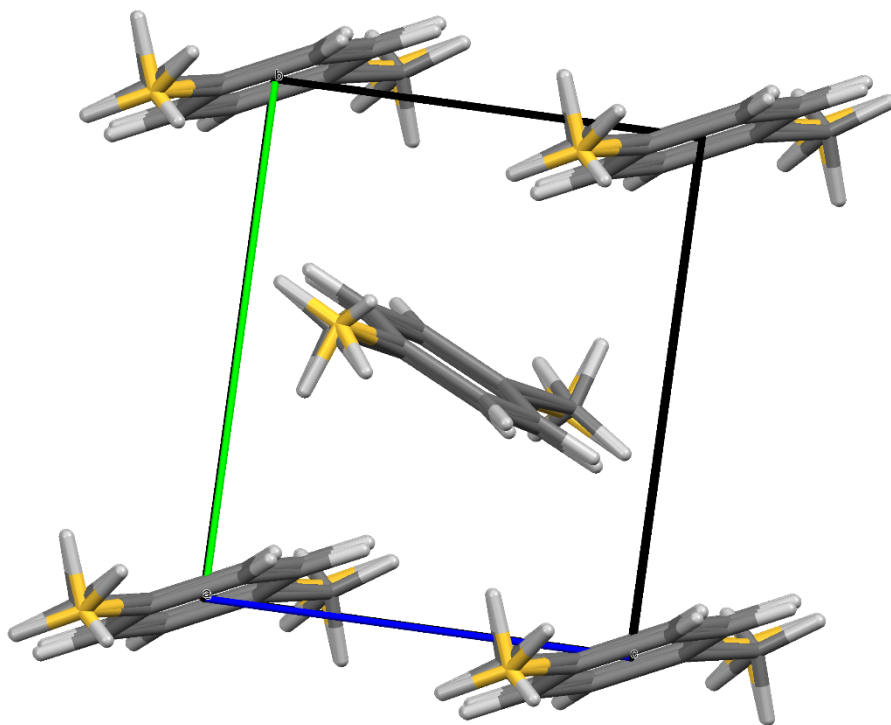

**Figure S112.** Crystal structure of *p*-thiocresol. Top: ORTEP diagram of the *p*-thiocresol monomer with ellipsoids shown at 50% probability; bottom: overall crystal packing. Diffractable crystals were used directly from commercially available material. Both disordered contributions are depicted and superimposed on one another.

**Table S28.** Crystallographic data and refinement details for *p*-thiocresol.

|                                            |                                                                                                                                                               |                           |
|--------------------------------------------|---------------------------------------------------------------------------------------------------------------------------------------------------------------|---------------------------|
| empirical formula                          | C <sub>7</sub> H <sub>8</sub> S                                                                                                                               |                           |
| formula weight                             | 124.19                                                                                                                                                        |                           |
| <i>T</i> (K)                               | 200(2)                                                                                                                                                        |                           |
| wavelength (Å)                             | 0.71073                                                                                                                                                       |                           |
| crystal system, space group                | Monoclinic, P1 2 <sub>1</sub> /c1                                                                                                                             |                           |
| Unit cell dimensions (Å, °)                | a = 7.742(3)                                                                                                                                                  | α = 90                    |
|                                            | b = 7.223(3)                                                                                                                                                  | β = 92.953(6)             |
|                                            | c = 5.956(2)                                                                                                                                                  | γ = 90                    |
| Volume (Å <sup>3</sup> )                   | 332.6(2)                                                                                                                                                      |                           |
| Z, Z', calcd density (g/cm <sup>3</sup> )  | 2, 0.5, 1.240                                                                                                                                                 |                           |
| absorption coefficient (mm <sup>-1</sup> ) | 0.371                                                                                                                                                         |                           |
| F(000)                                     | 132                                                                                                                                                           |                           |
| crystal size (mm)                          | 0.141 x 0.204 x 0.230                                                                                                                                         |                           |
| θ range for data collection                | 2.63 to 27.68°                                                                                                                                                |                           |
| Index ranges                               | -10 ≤ h ≤ 10, -9 ≤ k ≤ 9, -7 ≤ l ≤ 7                                                                                                                          |                           |
| Reflections collected/ unique              | 4782/774 [R(int) = 0.0501]                                                                                                                                    |                           |
| Coverage of independent reflections        | 99.7%                                                                                                                                                         |                           |
| Absorption correction                      | multi-scan                                                                                                                                                    |                           |
| Max. and min. transmission                 | 0.7456 and 0.6534                                                                                                                                             |                           |
| Structure solution technique               | direct methods                                                                                                                                                |                           |
| Refinement method                          | Full-matrix least-squares on F <sup>2</sup>                                                                                                                   |                           |
| Function minimized                         | Σ w(F <sub>o</sub> <sup>2</sup> - F <sub>c</sub> <sup>2</sup> ) <sup>2</sup>                                                                                  |                           |
| Data / restraints / parameters             | 774 / 1 / 41                                                                                                                                                  |                           |
| Goodness-of-fit on F <sup>2</sup>          | 1.077                                                                                                                                                         |                           |
| Final R indices                            | 560 data; I>2σ(I)                                                                                                                                             | R1 = 0.0575, wR2 = 0.1597 |
|                                            | all data                                                                                                                                                      | R1 = 0.0809, wR2 = 0.1745 |
| Weighting scheme                           | w=1/[σ <sup>2</sup> (F <sub>o</sub> <sup>2</sup> )+(0.0974P) <sup>2</sup> +0.0719P]<br>where P=(F <sub>o</sub> <sup>2</sup> +2F <sub>c</sub> <sup>2</sup> )/3 |                           |
| Largest diff. peak and hole                | 0.368 and -0.186 eÅ <sup>-3</sup>                                                                                                                             |                           |
| R.M.S. deviation from mean                 | 0.064 eÅ <sup>-3</sup>                                                                                                                                        |                           |

**Table S29.** Atomic coordinates ( $\times 10^4$ ) and equivalent isotropic displacement parameters ( $\text{Å}^2 \times 10^3$ ) for *p*-thiocresol.  $U(\text{eq})$  is defined as one third of the trace of the orthogonalized  $U_{ij}$  tensor.

|    | x/a        | y/b        | z/c        | U(eq)      |
|----|------------|------------|------------|------------|
| S1 | 0.3507(3)  | 0.4458(6)  | 0.7745(6)  | 0.0533(10) |
| C1 | 0.6804(14) | 0.5443(17) | 0.2107(19) | 0.0323(11) |
| C2 | 0.839(3)   | 0.533(4)   | 0.370(5)   | 0.0323(11) |
| C3 | 0.839(3)   | 0.450(4)   | 0.580(5)   | 0.0341(12) |
| C4 | 0.993(3)   | 0.424(4)   | 0.706(5)   | 0.0325(11) |
| C5 | 0.148(3)   | 0.482(4)   | 0.621(5)   | 0.0323(11) |
| C6 | 0.149(3)   | 0.565(4)   | 0.411(5)   | 0.0341(12) |
| C7 | 0.994(3)   | 0.591(4)   | 0.285(5)   | 0.0325(11) |

**Table S30.** Bond lengths [ $\text{Å}$ ] and angles [ $^\circ$ ] for *p*-thiocresol.

Bond lengths

|        |           |        |         |
|--------|-----------|--------|---------|
| S1-C5  | 1.793(12) | S1-H1S | 1.07(7) |
| C1-C2  | 1.514(11) | C1-H1A | 0.98    |
| C1-H1B | 0.98      | C1-H1C | 0.98    |
| C2-C3  | 1.39      | C2-C7  | 1.39    |
| C3-C4  | 1.39      | C3-H3  | 0.95    |
| C4-C5  | 1.39      | C4-H4  | 0.95    |
| C5-C6  | 1.39      | C6-C7  | 1.39    |
| C6-H6  | 0.95      | C7-H7  | 0.95    |

Bond angles

|            |           |            |           |
|------------|-----------|------------|-----------|
| C5-S1-H1S  | 109.(4)   | C2-C1-H1A  | 109.5     |
| C2-C1-H1B  | 109.5     | H1A-C1-H1B | 109.5     |
| C2-C1-H1C  | 109.5     | H1A-C1-H1C | 109.5     |
| H1B-C1-H1C | 109.5     | C3-C2-C7   | 120.0     |
| C3-C2-C1   | 123.1(17) | C7-C2-C1   | 116.4(17) |
| C4-C3-C2   | 120.0     | C4-C3-H3   | 120.0     |
| C2-C3-H3   | 120.0     | C3-C4-C5   | 120.0     |
| C3-C4-H4   | 120.0     | C5-C4-H4   | 120.0     |
| C4-C5-C6   | 120.0     | C4-C5-S1   | 121.4(12) |
| C6-C5-S1   | 118.6(13) | C5-C6-C7   | 120.0     |
| C5-C6-H6   | 120.0     | C7-C6-H6   | 120.0     |
| C6-C7-C2   | 120.0     | C6-C7-H7   | 120.0     |
| C2-C7-H7   | 120.0     |            |           |

**Table S31.** Anisotropic atomic displacement parameters ( $\text{\AA}^2$ ) for *p*-thiocresol. The anisotropic atomic displacement factor exponent takes the form:  $-2\pi^2 [ h^2 a^2 U_{11} + \dots + 2 h k a^* b^* U_{12} ]$

|    | $U_{11}$   | $U_{22}$   | $U_{33}$   | $U_{23}$    | $U_{13}$    | $U_{12}$   |
|----|------------|------------|------------|-------------|-------------|------------|
| S1 | 0.0358(12) | 0.0682(15) | 0.0550(14) | -0.0026(9)  | -0.0068(9)  | 0.0079(10) |
| C1 | 0.038(3)   | 0.029(3)   | 0.0291(19) | -0.0008(19) | -0.0022(14) | 0.0039(19) |
| C2 | 0.038(3)   | 0.029(3)   | 0.0291(19) | -0.0008(19) | -0.0022(14) | 0.0039(19) |
| C3 | 0.037(3)   | 0.033(3)   | 0.033(2)   | -0.001(2)   | 0.0075(15)  | -0.001(2)  |
| C4 | 0.045(3)   | 0.030(3)   | 0.022(2)   | 0.003(2)    | 0.0024(15)  | 0.002(2)   |
| C5 | 0.038(3)   | 0.029(3)   | 0.0291(19) | -0.0008(19) | -0.0022(14) | 0.0039(19) |
| C6 | 0.037(3)   | 0.033(3)   | 0.033(2)   | -0.001(2)   | 0.0075(15)  | -0.001(2)  |
| C7 | 0.045(3)   | 0.030(3)   | 0.022(2)   | 0.003(2)    |             |            |

**Table S32.** Hydrogen atomic coordinates and isotropic atomic displacement parameters ( $\text{\AA}^2$ ) for *p*-thiocresol.

|     | $x/a$    | $y/b$    | $z/c$     | $U(\text{eq})$ |
|-----|----------|----------|-----------|----------------|
| H1S | 1.448(9) | 0.529(8) | 0.702(11) | 0.064          |
| H1A | 0.7074   | 0.6171   | 0.0781    | 0.048          |
| H1B | 0.5862   | 0.6041   | 0.2872    | 0.048          |
| H1C | 0.6450   | 0.4193   | 0.1640    | 0.048          |
| H3  | 0.7325   | 0.4100   | 0.6378    | 0.041          |
| H4  | 0.9925   | 0.3673   | 0.8496    | 0.039          |
| H6  | 1.2547   | 0.6048   | 0.3531    | 0.041          |
| H7  | 0.9947   | 0.6476   | 0.1413    | 0.039          |

**Table S33.** Torsion angles ( $^\circ$ ) for *p*-thiocresol.

|             |            |             |            |
|-------------|------------|-------------|------------|
| C7-C2-C3-C4 | 0          | C1-C2-C3-C4 | 172.3(17)  |
| C2-C3-C4-C5 | 0          | C3-C4-C5-C6 | 0          |
| C3-C4-C5-S1 | -178.2(12) | C4-C5-C6-C7 | 0          |
| S1-C5-C6-C7 | 178.2(11)  | C5-C6-C7-C2 | 0          |
| C3-C2-C7-C6 | 0          | C1-C2-C7-C6 | -172.8(15) |



## References

1. Forbes, C. R.; Pandey, A. K.; Ganguly, H. K.; Yap, G. P. A.; Zondlo, N. J., 4*R*- and 4*S*-iodophenyl hydroxyproline, 4*R*-pentynoyl hydroxyproline, and S-propargyl-4-thiophenylalanine: conformationally biased and tunable amino acids for bioorthogonal reactions. *Org. Biomol. Chem.* **2016**, *14*, 2327-2346.
2. van Rossum, B. J.; Forster, H.; de Groot, H. J. M., High-field and high-speed CP-MAS C-13 NMR heteronuclear dipolar-correlation spectroscopy of solids with frequency-switched Lee-Goldburg homonuclear decoupling. *J. Magn. Reson.* **1997**, *124*, 516-519.
3. Frisch, M. J.; Trucks, G. W.; Schlegel, H. B.; Scuseria, G. E.; Robb, M. A.; Cheeseman, J. R.; Scalmani, G.; Barone, V.; Mennucci, B.; Petersson, G. A.; Nakatsuji, H.; Caricato, M.; Li, X.; Hratchian, H. P.; Izmaylov, A. F.; Bloino, J.; Zheng, G.; Sonnenberg, J. L.; Hada, M.; Ehara, M.; Toyota, K.; Fukuda, R.; Hasegawa, J.; Ishida, M.; Nakajima, T.; Honda, Y.; Kitao, O.; Nakai, H.; Vreven, T.; Montgomery, J. A., Jr.; Peralta, J. E.; Ogliaro, F.; Bearpark, M.; Heyd, J. J.; Brothers, E.; Kudin, K. N.; Staroverov, V. N.; Kobayashi, R.; Normand, J.; Raghavachari, K.; Rendell, A.; Burant, J. C.; Iyengar, S. S.; Tomasi, J.; Cossi, M.; Rega, N.; Millam, J. M.; Klene, M.; Knox, J. E.; Cross, J. B.; Bakken, V.; Adamo, C.; Jaramillo, J.; Gomperts, R.; Stratmann, R. E.; Yazyev, O.; Austin, A. J.; Cammi, R.; Pomelli, C.; Ochterski, J. W.; Martin, R. L.; Morokuma, K.; Zakrzewski, V. G.; Voth, G. A.; Salvador, P.; Dannenberg, J. J.; Dapprich, S.; Daniels, A. D.; Farkas, Ö.; Foresman, J. B.; Ortiz, J. V.; Cioslowski, J.; Fox, D. J. *GAUSSIAN 09*, Revision B.01; Gaussian, Inc.: Wallingford, CT, 2009.
4. Glendening, E. D.; Reed, A. E.; Carpenter, J. E.; Weinhold, F. *NBO*, Version 3.1.
5. Breneman, C. M.; Wiberg, K. B., Determining atom-centered monopoles from molecular electrostatic potentials. The need for high sampling density in formamide conformational analysis. *J. Comput. Chem.* **1990**, *11*, 361-373.
6. Gadre, S. R.; Sen, K. D., Radii of monovalent atomic ions. *J. Phys. Chem.* **1993**, *99*, 3149-3150.
7. Gilli, G.; Gilli, P., *The Nature of the Hydrogen Bond: Outline of a Comprehensive Hydrogen Bond Theory*. Oxford University Press: New York, 2009; Vol. 23.
8. Bruker *Apex2*, Bruker AXS, Inc.: Madison, WI, 2007.
9. Sheldrick, G. M., A short history of SHELX. *Acta Crystallogr., Sect. A* **2008**, *64*, 112-122.
10. Macrae, C. F.; Bruno, I. J.; Chisholm, J. A.; Edgington, P. R.; McCabe, P.; Pidcock, E.; Rodriguez-Monge, L.; Taylor, R.; van de Streek, J.; Wood, P. A., *Mercury CSD 2.0* - new features for the visualization and investigation of crystal structures. *J. Appl. Crystallogr.* **2008**, *41*, 466-470.
